# Supplementary material for: Filamentation Involves Two Overlapping, but Distinct, Programs of Filamentation in the Pathogenic Fungus Candida albicans
Source: G3 (Bethesda). 2017 Sep 25;7(11):3797–808. doi: 10.1534/g3.117.300224 (PMC5677161; doi:10.1534/g3.117.300224)
Supplement: Supplementary file 11 [file 3797TableS1.xlsx]

## Sheet: Sheet1
Table S1. Read statistics for RNAseq
		Reads			% mapped reads
State	Media	a	b	c	a	b	c
Solid	YPD	16858632	29159234	39051288	95.3755	94.7272	94.3989
	FBS	18962994	41193823	37993346	95.5744	93.9538	94.6292
	Lee's	19213243	28779000	40907612	95.6687	94.6713	95.0078
	RPMI	19856806	35733069	35769739	94.7855	94.0466	89.141
	Spider	17404569	31919831	38516332	95.4393	94.4618	94.4831
Liquid	YPD	18810139	27093532	39908678	95.929	93.5818	92.077
	FBS	19479786	24805046	38483327	95.2354	73.962	93.2594
	Lee's	19340460	28484135	36353452	94.3763	92.4467	93.5954
	RPMI	15828113	46372180	37181367	94.1383	92.8085	93.7429
	Spider	19730828	37129546	30372431	95.9196	93.2748	93.1386
a, b, and c refer to independent experiments. Experiment a was run on a single lane while experiments b and c were run on two lanes.
Experiments b and c were collected simultaneously and sequenced at a later date than experiment a.
