# Supplementary material for: Filamentation Involves Two Overlapping, but Distinct, Programs of Filamentation in the Pathogenic Fungus Candida albicans
Source: G3 (Bethesda). 2017 Sep 25;7(11):3797–808. doi: 10.1534/g3.117.300224 (PMC5677161; doi:10.1534/g3.117.300224)
Supplement: Supplementary file 12 [file 3797TableS2.xlsx]

## Sheet: Sheet1
			Liquid					Solid
ORF	ORF19	Gene	F	L	R	S	Y	F	L	R	S*	Y
C6_01070C	ORF19.113	CIP1	4	0.5	4	3.83	3.5	3.17	1.17	4	4	4		Scores are averages of the blinded filamentation scores from 3 scorers.
C6_01110W	ORF19.118	FAD2	4	0.5	3.5	3.5	3.83	3	2.83	4	3.83	4		Scores range from 0 (defective phenotype) to 4 (wild type phenotype)
C4_00080C	ORF19.376		4	1	3.33	4	4	3.17	4	3.83	3	4		The heat map represents low scores (blue) to high scores (yellow).
C1_04800C	ORF19.762		3.5	1	2	2	3.33	2.83	1.83	4	0.67	4
C5_00580W	ORF19.931		4	1.5	4	4	3.67	3.33	3.67	4	4	4
C2_01450C	ORF19.1449		4	1.83	4	4	4	3	2.33	4	3.33	4
C3_01410C	ORF19.1710		3.33	3.67	0.83	0.33	3.33	4	0	3.67	0.33	4
C3_00960W	ORF19.2500		3.83	4	2.67	3.83	3.5	3.67	0	3.67	0.33	3.67
CR_01740W	ORF19.2570	MCI4	3	4	3.17	0	3.33	3.83	0	2.83	0.33	4
CR_02620C	ORF19.2821		3	3.33	2.83	0	3.33	1.83	0	3.67	0.33	1.33
C4_03510C	ORF19.3380	HWP2	3.67	3.67	3.83	2.33	3.5	0.67	0	0	1.83	3.67
C1_09020W	ORF19.4758		3.5	3.67	4	0.83	3.5	3.5	0	3.67	0.33	4
C1_13070C	ORF19.4933	FAD3	4	3	3.83	2.33	3.83	2.33	0.67	0	1.5	3.67
C1_12290C	ORF19.5234	RBD1	4	3.83	3.5	4	3.67	2.83	1.67	3.33	2.83	1.5
C6_02740W	ORF19.5547		3.17	3.33	1.33	0	3.5	0	0	1.33	0.33	4
C1_00700W	ORF19.6035		3.17	3.83	3.83	1.83	3.17	3.83	2.83	3.67	4	4
C3_06470W	ORF19.7436	AAF1	4	2.67	4	3.67	3.17	4	2.5	3.67	0.5	2.83
C2_06540C	ORF19.30		2	2.5	2.67	3	3.17	2.67	0	0	1.33	4
C3_02960C	ORF19.290	KRE5	0	0.33	0	0	3.67	1.83	0	0	1.33	4
C3_03030C	ORF19.299	ECM14	4	2	4	3	4	2.83	3.5	3.83	4	3.83
C3_03290C	ORF19.328	NPR2	3.67	3.83	3.67	3.17	3.83	3.67	0.67	2.83	3	3.67
CR_03900W	ORF19.469	HST7	3.83	2.17	4	4	2.83	3.83	3.67	4	3.83	4
C2_09370C	ORF19.564	KAR3	1.83	0.33	1.67	2.33	3.33	3.33	2.17	4	3.33	3.67
CR_05030W	ORF19.649		2.67	3.17	2.33	3	4	3.33	2	0	3.67	4
C1_11400C	ORF19.663	GIN4	1.83	1.83	1.67	1.67	1.67	3	3	2.5	3	2.83
CR_06590C	ORF19.695	RGS2	3.5	0.83	4	4	3.67	4	4	3.67	4	4
CR_06670W	ORF19.701	CFL11	3.83	1.17	4	4	4	3.83	2.33	4	4	3.33
CR_06440C	ORF19.723	BCR1	2.83	0.83	2.33	2.83	3.33	3.33	4	1.83	2.17	1.83
CR_06420W	ORF19.726	PPZ1	3	3.17	2.17	2.83	3.83	3.67	0.5	3.67	3.83	4
CR_07580C	ORF19.728	TSC11	3	1.5	2.17	2.67	3.33	2	0.33	0	1	4
C1_04630C	ORF19.783		1.67	0.17	1.17	1.33	3.17	2.17	0	0.5	3.5	4
C2_04260W	ORF19.794		4	1.17	3	3.17	3.83	3.5	3.67	3	4	4
C2_04140W	ORF19.807	CHS5	4	3.17	3.33	4	3.5	2.83	2	3.17	3.5	1.33
C2_04050C	ORF19.815	DCK1	3.83	2.5	3.67	4	3.67	3.67	4	4	0.83	4
C2_03770C	ORF19.844	STE11	3.67	1.33	3.5	4	3.33	3.67	1	4	1.67	4
C2_03330C	ORF19.895	HOG1	1.67	2.67	1.83	1.5	3	3.67	2.67	0	3	3.67
C6_04340W	ORF19.1092		4	3.83	3.33	3.17	3.83	3.67	3.5	1.5	3.83	4
C6_00280W	ORF19.1187	CPH2	4	0.67	3.5	4	3.67	3.67	4	4	3	4
C2_09770C	ORF19.1373	INP51	1.83	3	3.67	3.33	3	2	1.5	0.33	3.83	4
C2_01620W	ORF19.1471	COX4	3.17	3.33	1.5	0.33	3.5	0.67	0	2.5	0.33	0
C2_01780W	ORF19.1490	MSB2	3.5	4	3.33	3.17	4	3.33	1.17	3.33	2.67	3.83
C2_02440W	ORF19.1567		3	4	3.83	4	3.33	0	1.5	2	3.67	4
C3_02240C	ORF19.1621	GPA2	1.83	2.83	2.33	2.17	3.67	1.83	0	0	0	4
C3_01810C	ORF19.1665	MNT1	4	1.17	3.83	3.83	4	3.5	3.67	4	2.83	4
C3_01730C	ORF19.1671	UTR2	3.67	3.67	3.17	3.67	3.83	3.67	0.83	3.33	3.83	4
C3_01470W	ORF19.1702	ARF3	3.83	1.17	2.83	4	3.67	2.83	3.83	4	0.83	4
C2_10310C	ORF19.1747	KIP2	3.83	1.83	3.83	3.83	4	3.67	2.83	4	2.5	4
CR_07090W	ORF19.1814	STT4	2.33	1.83	2.5	3.67	3.83	2.17	0.67	3	0.83	4
C2_06910W	ORF19.2245	YPT72	3.33	1.83	3.67	3.67	3.33	2	0.83	2.33	3.17	4
CR_03430W	ORF19.2378		0.83	0.17	0	0.17	3.83	0.17	1.33	2.17	3.67	3.67
C1_05670W	ORF19.2484		2	3	4	3	3.5	2.83	0	3.67	3.83	4
CR_01520W	ORF19.2538	PTC2	4	0.83	3.5	2.67	4	1.67	0.83	4	3.67	4
C4_02970C	ORF19.2695	UBR1	4	2.67	3.83	3.83	3.33	3.5	4	4	3.67	1.5
C4_02960W	ORF19.2697		4	0.83	3.83	1.67	4	3	1	4	0	3.83
C4_02500C	ORF19.2752	ADR1	4	0.83	3.33	3	3.67	3.33	2.33	4	1.17	4
CR_02850C	ORF19.2842	GZF3	3	4	2.67	4	4	3.83	3.5	3.5	4	3.67
C4_06480C	ORF19.2886	CEK1	4	2	3.83	4	4	3.33	3.17	2.83	3.67	4
C1_01270W	ORF19.3315	CTA9	3.5	1.5	3.67	4	3.83	3.33	3.17	3.33	1.33	3.83
CR_07810W	ORF19.3710	YHB5	3.5	1.33	3.67	4	3.5	3.33	4	4	3.17	3.67
C4_04850C	ORF19.3794	CSR1	3	4	3	3.83	3.83	3.5	2.83	4	1.67	4
C4_04710W	ORF19.3811	GYP1	2.5	2.33	1.83	4	3.33	2.67	2.33	0.33	3.67	4
C4_04530C	ORF19.3829	PHR1	2.5	1.83	2.17	2.5	4	0	0.83	0	3.17	4
C4_04420W	ORF19.3845	FGR3	3.67	0.67	4	4	3.5	3.17	4	4	0	4
CR_06040W	ORF19.3854		4	1.83	3.33	4	3.33	3.17	4	4	3	4
C5_04600C	ORF19.3944	GRR1	3	1.33	2.67	2.33	1	0.33	0	2.67	0.83	3.17
C5_05030C	ORF19.3995	RIM13	3.67	2	3.17	2.83	3.33	1.83	3.17	2.17	3.5	4
C5_05210W	ORF19.4014		3.33	1.33	3.5	3.83	4	3.17	4	4	0.83	4
C5_05400W	ORF19.4036	APM1	3.67	1.83	3.5	3.83	3.83	3.17	3.67	4	3.33	4
C1_05140W	ORF19.4056	GAT2	1.83	0.67	2.67	2.83	4	2	0	4	2.67	4
C2_09230C	ORF19.4084	KIS1	4	0.5	4	2.33	3.33	3.5	3.33	3.83	3.67	3.67
C4_00610W	ORF19.4182		1.67	0.33	1	0.17	3.33	1.33	1	0	2.17	3.67
C5_02670W	ORF19.4284	BUR2	4	0.67	3.83	4	3.67	3.17	4	4	3.33	4
C5_02840C	ORF19.4308	HSL1	3.83	3.17	4	3.83	2	3.33	3.67	3.33	4	1
CR_03800C	ORF19.4378	PPH3 (partial?)	3.33	2.83	2.17	4	2.83	2.67	0	3.17	2.33	3.83
C1_07230W	ORF19.4444	PHO15	2	2	2.67	3.83	3.67	3.33	1.17	4	3.17	4
C1_03870C	ORF19.4459		3.33	1	3.67	4	3.67	2.83	2.17	4	3.33	4
C1_03960C	ORF19.4471		4	2.33	3.67	3.67	3.67	2.5	0	0	3.67	4
C4_01890C	ORF19.4603	ARL1	3.67	3.17	3.5	3.33	3.33	3	0.33	0.67	3.67	4
C4_01380W	ORF19.4649		3.67	2.17	3.67	4	3.83	2.5	2	4	2.17	4
C1_08700W	ORF19.4729		1.67	3.83	4	4	3.33	3.67	0	3.83	2.67	0.83
C1_08990C	ORF19.4755	KEX2	0	0.5	0.33	0.67	2.67	0	0	0	1	2.67
C1_09140C	ORF19.4772	SSU81	4	2.5	3.83	4	4	3.17	2	4	3.17	3.67
C1_09260C	ORF19.4785	PTC1	2.33	2	3.17	3.67	3.5	2.67	0	0.67	3.33	4
C1_09790C	ORF19.4844		2	4	3.67	3.17	3.17	2.83	0	3.33	2.83	4
C1_09920W	ORF19.4859		3	0.5	0.17	3.17	3.17	1.33	0.33	3.33	3.33	4
C1_10000C	ORF19.4866	CPP1	4	3	4	3	1.5	2.5	3.17	3.33	3.67	3.17
C1_10210C	ORF19.4890	CLA4	4	3	4	4	3.5	3.33	0.33	1.33	2.83	4
C1_13440C	ORF19.4972	OFI1	4	1.67	3.67	4	3.33	3.67	4	4	2.83	4
C1_07970C	ORF19.5068	IRE1	0.83	1.67	1.33	2	3.83	2.33	1.17	2.83	3.83	3.67
C1_04380W	ORF19.5200	SIT4	3.5	2.17	3.83	4	3.33	3.67	4	4	3	4
C1_12230W	ORF19.5241	SNT1	3	3.17	4	3.67	3.17	3.33	3.5	3.67	3.5	0
C4_04090C	ORF19.5300		0.17	3.5	2.5	0.5	3.5	1.67	1.33	0	3.5	4
C3_00570C	ORF19.5406		4	2	4	2.5	2.33	3.5	4	4	4	1
C3_00240C	ORF19.5445	GLO3	3.5	2.83	3.83	3.5	3.17	3.67	1.17	3	3.67	4
C2_06170C	ORF19.5477		3.67	2	2	4	3.33	2.83	0	2.5	1	4
C4_00340W	ORF19.5661	PTC7	3.83	0.33	3.83	4	3.67	3.17	4	4	3.67	4
C2_03180C	ORF19.5776	TOM1	3.67	4	4	3.67	3.5	2.17	0.33	3.67	3.67	4
C3_05170W	ORF19.5992	WOR2	4	2.33	4	3.83	4	3.5	4	3.83	3.67	0
C1_00930C	ORF19.6011	SIN3	3.83	2	3.33	3.17	2.83	3.33	1	0	0.17	4
C3_07860C	ORF19.6182	MRR2	3.67	1.33	3.83	4	3.67	3.33	3.83	4	3.17	4
CR_07590W	ORF19.6293		4	3.67	4	3.33	2.83	2.67	1	0	2.67	4
C6_00130C	ORF19.6324	VID27	3	2	1.5	4	3.33	2.33	1.33	3.33	3.33	4
C1_12650C	ORF19.6358		4	1.5	3.83	4	4	2.5	3.67	4	2.5	4
C7_01950W	ORF19.6526		4	1.5	3.67	4	4	2.83	3.83	4	2.5	4
CR_05620C	ORF19.6653		4	3.17	2.5	4	3.33	2.33	0	3.33	0.83	4
C3_07550C	ORF19.6736		2.33	4	3.33	3.5	3.33	3	0	3.17	1	4
C1_04480C	ORF19.6842		3.67	3.33	3.17	3.67	3.5	3	2.67	3.5	4	4
C2_05640W	ORF19.6874		2.67	0.17	2.5	2.33	3.67	3.83	2.83	4	3.5	0
C3_03880C	ORF19.6927	PEP8	2	0	1.17	1.83	3.83	1.33	1	3.83	3.5	4
C3_05420W	ORF19.6980		3.83	1.67	3.17	3.33	4	2.67	1.67	4	3.5	4
C7_00340C	ORF19.7086		4	0.33	3.17	2.83	3.83	2.67	3.17	4	1.83	4
C1_14140C	ORF19.7221	SET3	3.83	1.67	3.67	3.67	3.67	3.17	4	4	3.67	0
C1_14170W	ORF19.7224		4	1.5	3.5	4	3.83	3	3.67	4	3.67	4
C1_14340C	ORF19.7247	RIM101	1.5	0.83	1.5	0.83	3.67	0	0	3.33	3.33	4
CR_08870W	ORF19.7282	PEX13	3.83	0.83	2.33	2.33	4	2.83	0	4	3.33	4
C3_06000W	ORF19.7381	AHR1	2.83	1	1.83	1.17	3.67	2.33	1.33	4	3.83	1
C3_06070C	ORF19.7388	PBS2	4	2.67	2.83	3.17	2.17	3.33	0.17	0	0	2.5
CR_00590W	ORF19.7475	PHO81	2.5	1.17	2.33	1.33	3.5	3	3.33	4	3.67	4
CR_10340W	ORF19.7610	PTP3	4	2.83	2.67	3.67	3.83	1	2.33	0	3.67	4
C2_02200W	ORF19.9111		3.67	3.33	2.67	4	3.5	3	0	2.67	1.5	3.17
CR_02640W	ORF19.10341	RFG1	1.5	2.5	3.33	3.17	3.17	2.5	0	2.5	0.17	4
C4_05030C	ORF19.11257	SSK2	3.83	2.83	2.5	2.17	2.33	3.17	0	3	0	4
C1_07870C	ORF19.12525	SMI1	3	3.17	3	1.33	3.5	2.83	0	1.33	0	3.67
C6_03920W	ORF19.13191	SNF4	3.17	2	3.5	0	3.33	2.5	0.17	1.17	0.33	3.5
