# Supplementary material for: Filamentation Involves Two Overlapping, but Distinct, Programs of Filamentation in the Pathogenic Fungus Candida albicans
Source: G3 (Bethesda). 2017 Sep 25;7(11):3797–808. doi: 10.1534/g3.117.300224 (PMC5677161; doi:10.1534/g3.117.300224)
Supplement: Supplementary file 13 [file 3797TableS3.xlsx]

## Sheet: Sheet1
			Liquid					Solid
ORF	ORF19	Gene	F	L	R	S	Y	F	L	R	S*	Y	Competitive	Virulence		Scores are averages of the blinded filamentation scores from 3 scorers.
C4_04530C	ORF19.3829	PHR1	2.5	1.83	2.17	2.5	4	0	0.83	0	3.17	4	defect	avirulent		Scores range from 0 (defective phenotype) to 4 (wild type phenotype)
C1_10210C	ORF19.4890	CLA4	4	3	4	4	3.5	3.33	0.33	1.33	2.83	4	defect	avirulent		The heat map represents low scores (blue) to high scores (yellow).
C3_06470W	ORF19.30		2	2.5	2.67	3	3.17	2.67	0	0	1.33	4	defect	decreased		"Competive" refers to strain phenotypes in a competitive survival assay in a murine tail vein injection model of infection published in Noble et al (17)
C2_06540C	ORF19.4755	KEX2	0	0.5	0.33	0.67	2.67	0	0	0	1	2.67	defect	decreased			Defect-the mutant strain was less abundant in kidneys after infection than before infection in a pooled infectivity murine tail vein injection assay.
CR_06420W	ORF19.895	HOG1	1.67	2.67	1.83	1.5	3	3.67	2.67	0	3	3.67	defect	decreased			normal-the mutant strain was equally abundant in kidneys after infection as before infection in a pooled infectivity murine tail vein injection assay.
C2_03330C	ORF19.1373	INP51	1.83	3	3.67	3.33	3	2	1.5	0.33	3.83	4	defect	decreased		"Virulence" refers to the virulence phenotype of strains bearing deletions in the same gene in a murine tail vein injection model of infection as listed in the Candida Genome Database (20).
C2_09770C	ORF19.1671	UTR2	3.67	3.67	3.17	3.67	3.83	3.67	0.83	3.33	3.83	4	defect	decreased			Avirulent-the mutation is unable to cause disease.
C3_01730C	ORF19.4866	CPP1	4	3	4	3	1.5	2.5	3.17	3.33	3.67	3.17	defect	decreased			Decreased-the mutant strain is less pathogenic than a control strain.
C5_02840C	ORF19.4308	HSL1	3.83	3.17	4	3.83	2	3.33	3.67	3.33	4	1	defect	decreased			N/T-not tested.
C1_08990C	ORF19.726	PPZ1	3	3.17	2.17	2.83	3.83	3.67	0.5	3.67	3.83	4	defect	decreased			normal-equal virulence to a control strain.
C1_10000C	ORF19.7436	AAF1	4	2.67	4	3.67	3.17	4	2.5	3.67	0.5	2.83	defect	decreased
C3_02240C	ORF19.7388	PBS2	4	2.67	2.83	3.17	2.17	3.33	0.17	0	0	2.5	defect	N/T
C3_00960W	ORF19.4933	FAD3	4	3	3.83	2.33	3.83	2.33	0.67	0	1.5	3.67	defect	N/T
CR_01740W	ORF19.4182		1.67	0.33	1	0.17	3.33	1.33	1	0	2.17	3.67	defect	N/T
CR_02620C	ORF19.6011	SIN3	3.83	2	3.33	3.17	2.83	3.33	1	0	0.17	4	defect	N/T
C1_09020W	ORF19.6293		4	3.67	4	3.33	2.83	2.67	1	0	2.67	4	defect	N/T
C1_13070C	ORF19.649		2.67	3.17	2.33	3	4	3.33	2	0	3.67	4	defect	N/T
C1_12290C	ORF19.4603	ARL1	3.67	3.17	3.5	3.33	3.33	3	0.33	0.67	3.67	4	defect	N/T
C1_00700W	ORF19.1092		4	3.83	3.33	3.17	3.83	3.67	3.5	1.5	3.83	4	defect	N/T
C3_03290C	ORF19.723	BCR1	2.83	0.83	2.33	2.83	3.33	3.33	4	1.83	2.17	1.83	defect	N/T
CR_05030W	ORF19.1567		3	4	3.83	4	3.33	0	1.5	2	3.67	4	defect	N/T
CR_06440C	ORF19.3995	RIM13	3.67	2	3.17	2.83	3.33	1.83	3.17	2.17	3.5	4	defect	N/T
C2_04140W	ORF19.2570	MCI4	3	4	3.17	0	3.33	3.83	0	2.83	0.33	4	defect	N/T
C6_04340W	ORF19.328	NPR2	3.67	3.83	3.67	3.17	3.83	3.67	0.67	2.83	3	3.67	defect	N/T
C2_01780W	ORF19.5445	GLO3	3.5	2.83	3.83	3.5	3.17	3.67	1.17	3	3.67	4	defect	N/T
C2_02440W	ORF19.6736		2.33	4	3.33	3.5	3.33	3	0	3.17	1	4	defect	N/T
C1_05670W	ORF19.807	CHS5	4	3.17	3.33	4	3.5	2.83	2	3.17	3.5	1.33	defect	N/T
CR_02850C	ORF19.4844		2	4	3.67	3.17	3.17	2.83	0	3.33	2.83	4	defect	N/T
C4_04850C	ORF19.1490	MSB2	3.5	4	3.33	3.17	4	3.33	1.17	3.33	2.67	3.83	defect	N/T
C5_05030C	ORF19.5234	RBD1	4	3.83	3.5	4	3.67	2.83	1.67	3.33	2.83	1.5	defect	N/T
C2_09230C	ORF19.6842		3.67	3.33	3.17	3.67	3.5	3	2.67	3.5	4	4	defect	N/T
C4_00610W	ORF19.2842	GZF3	3	4	2.67	4	4	3.83	3.5	3.5	4	3.67	defect	N/T
C4_01890C	ORF19.2500		3.83	4	2.67	3.83	3.5	3.67	0	3.67	0.33	3.67	defect	N/T
C1_09790C	ORF19.2821		3	3.33	2.83	0	3.33	1.83	0	3.67	0.33	1.33	defect	N/T
C1_12230W	ORF19.4758		3.5	3.67	4	0.83	3.5	3.5	0	3.67	0.33	4	defect	N/T
C3_00240C	ORF19.2484		2	3	4	3	3.5	2.83	0	3.67	3.83	4	defect	N/T
C2_03180C	ORF19.5776	TOM1	3.67	4	4	3.67	3.5	2.17	0.33	3.67	3.67	4	defect	N/T
C1_00930C	ORF19.6035		3.17	3.83	3.83	1.83	3.17	3.83	2.83	3.67	4	4	defect	N/T
CR_07590W	ORF19.5241	SNT1	3	3.17	4	3.67	3.17	3.33	3.5	3.67	3.5	0	defect	N/T
C3_07550C	ORF19.4084	KIS1	4	0.5	4	2.33	3.33	3.5	3.33	3.83	3.67	3.67	defect	N/T
C1_04480C	ORF19.3794	CSR1	3	4	3	3.83	3.83	3.5	2.83	4	1.67	4	defect	N/T
C3_06070C	ORF19.1621	GPA2	1.83	2.83	2.33	2.17	3.67	1.83	0	0	0	4	defect	normal
C3_02960C	ORF19.290	KRE5	0	0.33	0	0	3.67	1.83	0	0	1.33	4	normal	avirulent
C4_03510C	ORF19.3380	HWP2	3.67	3.67	3.83	2.33	3.5	0.67	0	0	1.83	3.67	normal	decreased
C3_01810C	ORF19.3811	GYP1	2.5	2.33	1.83	4	3.33	2.67	2.33	0.33	3.67	4	normal	decreased
C2_06910W	ORF19.4785	PTC1	2.33	2	3.17	3.67	3.5	2.67	0	0.67	3.33	4	normal	decreased
C4_06480C	ORF19.2245	YPT72	3.33	1.83	3.67	3.67	3.33	2	0.83	2.33	3.17	4	normal	decreased
CR_07810W	ORF19.2886	CEK1	4	2	3.83	4	4	3.33	3.17	2.83	3.67	4	normal	decreased
C4_04710W	ORF19.7247	RIM101	1.5	0.83	1.5	0.83	3.67	0	0	3.33	3.33	4	normal	decreased
C4_04420W	ORF19.4056	GAT2	1.83	0.67	2.67	2.83	4	2	0	4	2.67	4	normal	decreased
C1_05140W	ORF19.7381	AHR1	2.83	1	1.83	1.17	3.67	2.33	1.33	4	3.83	1	normal	decreased
C1_09260C	ORF19.1665	MNT1	4	1.17	3.83	3.83	4	3.5	3.67	4	2.83	4	normal	decreased
C1_04380W	ORF19.3710	YHB5	3.5	1.33	3.67	4	3.5	3.33	4	4	3.17	3.67	normal	decreased
C1_14340C	ORF19.3845	FGR3	3.67	0.67	4	4	3.5	3.17	4	4	0	4	normal	decreased
C3_06000W	ORF19.5200	SIT4	3.5	2.17	3.83	4	3.33	3.67	4	4	3	4	normal	decreased
CR_03900W	ORF19.469	HST7	3.83	2.17	4	4	2.83	3.83	3.67	4	3.83	4	normal	normal
C5_02670W	ORF19.4284	BUR2	4	0.67	3.83	4	3.67	3.17	4	4	3.33	4	normal	normal
