# Supplementary material for: Filamentation Involves Two Overlapping, but Distinct, Programs of Filamentation in the Pathogenic Fungus Candida albicans
Source: G3 (Bethesda). 2017 Sep 25;7(11):3797–808. doi: 10.1534/g3.117.300224 (PMC5677161; doi:10.1534/g3.117.300224)
Supplement: Supplementary file 14 [file 3797TableS4.xlsx]

## Sheet: Legend
FPKM values from each experiment were tested in triplicate.
Average FPKM values for each sample were compared to average FPKM values of cells grown in liquid YPD at 30˚C.
All data is log2 transformed
FL-FBS liquid
FS-FBS solid
LL-Lee's liquid
LS-Lee's solid
RL-RPMI liquid
RS-RPMI solid
SL-Spider solid
SS-Spider liquid
YS-YPD solid
Data in pink represents statistically significant data upregulated 2-fold or more.
Data in green represents statistically significant data downregulated 2-fold or more.

## Sheet: Comparitive data
ORF	gene	FL-log2(fold_change)	FS-log2(fold_change)	LL-log2(fold_change)	LS-log2(fold_change)	RL-log2(fold_change)	RS-log2(fold_change)	SL-log2(fold_change)	SS-log2(fold_change)	YS-log2(fold_change)
C1_00020C	CAALFM_C100020CA	0.530259	-0.147809	1.15177	-0.0655881	0.818559	-0.183915	0.841269	-0.187295	-0.326369
C1_00030C	CAALFM_C100030CA	1.16609	0.587258	1.84031	0.243131	0.535172	0.320837	1.59334	0.475204	-0.0171324
C1_00040W	CTA2	1.42523	1.22981	2.45494	1.09076	2.22964	1.09706	1.47951	0.0418537	-0.503515
C1_00060W	TUP1	-0.269492	-0.642684	-0.429141	-1.00005	-0.0263317	-0.652184	-0.264786	-0.881162	-0.749297
C1_00070W	MVD	-0.548795	-0.791293	-0.602653	-0.718116	-0.105807	-0.557091	-0.637731	-0.983428	-0.571428
C1_00080C	RCA1	-0.00897088	-0.444441	-0.216191	-0.414882	-0.193747	-0.511356	-0.0753819	-0.286251	-0.228878
C1_00090W	CAALFM_C100090WA	-0.123679	-0.0714341	-0.816523	-0.0813648	-0.378151	-0.202064	-0.312132	-0.590646	-0.141969
C1_00100C	CAALFM_C100100CA	-0.642398	-0.680716	-0.818842	-0.611408	-0.430229	-0.709546	-0.47957	-0.717538	-0.329593
C1_00110W	CCT8	-0.618087	-0.873327	-1.00799	-0.838508	-0.389634	-0.687684	-0.608049	-0.886039	-0.463275
C1_00120C	TRP1,VPS53	-0.00132926	-0.143766	-0.0367171	0.0722638	0.128973	-0.0378833	-0.00668138	-0.136982	0.0689424
C1_00140W	KEL1	0.155804	0.00913355	0.822366	0.101173	0.132779	0.0197173	0.208246	-0.0353112	-0.187169
C1_00150C	RIM8	-0.303451	-0.819261	-0.0356772	-0.937092	-0.561378	-1.25621	-0.455753	-0.973604	-0.500946
C1_00160C	CAALFM_C100160CA	-1.49577	-0.431486	-2.51792	-0.532793	-1.56913	-0.424035	-1.41501	-0.654763	0.0786528
C1_00170W	LEU4	-0.549263	1.51195	-1.31596	-0.454674	-0.893701	-0.813333	-0.389909	-0.798431	-0.516315
C1_00180W	RPL16A	-0.932047	-0.645132	-1.2781	-0.256711	-0.69049	-0.244671	-0.718327	-0.392818	0.157389
C1_00190C	CAALFM_C100190CA	2.45989	1.40798	2.79725	-0.95942	-0.453059	-0.692466	2.8686	2.00332	-1.1864
C1_00200C	CAALFM_C100200CA	0.650162	0.91489	0.237307	0.404796	0.0595684	-0.094142	0.974151	1.0249	-0.194102
C1_00210C	CAALFM_C100210CA	-0.00123609	0.148501	-0.209789	0.203967	0.123363	0.0931035	0.132275	0.0541131	0.0619632
C1_00220W	PHR2	-2.2555	-1.99721	-3.51151	-2.05433	-3.70457	-3.04499	-2.7247	-4.31424	-0.445592
C1_00230C	BFA1	0.14648	-0.0720045	0.241658	-0.071987	0.171355	-0.105452	0.160768	0.174764	-0.174582
C1_00270W	CAALFM_C100270WA	5.78461	6.4152	2.31861	2.33603	3.66003	2.57305	4.74152	3.38494	1.34306
C1_00290W	POL93	4.70815	4.4182	1.89715	1.2831	2.69076	1.05765	4.10565	1.95231	-0.217495
C1_00310W	CAALFM_C100310WA	1.48869	0.88337	1.76582	0.448981	1.21676	0.437115	1.45963	0.99873	-0.185841
C1_00320W	CAALFM_C100320WA	0.128453	-0.282895	0.451044	-0.151701	0.330669	-0.0173735	0.229459	-0.0830253	-0.0691456
C1_00330C	CAALFM_C100330CA	-0.185418	-0.490639	-0.250362	-0.18301	-0.0798299	-0.376741	-0.0293357	-0.245972	-0.0478245
C1_00340W	HBR1	-0.644045	-0.515619	-1.04965	-0.232735	-0.575531	-0.212504	-0.502304	-0.308049	-0.0364579
C1_00350C	HMX1	0.740699	2.31733	1.80007	0.474592	0.89559	-0.111805	0.86618	0.463466	-0.117118
C1_00360W	CDC13	0.321984	-0.282917	0.538273	-0.418559	0.425016	-0.539458	0.102571	-0.576975	-0.666855
C1_00370W	CAALFM_C100370WA	-0.348093	-0.197684	-0.432287	-0.00883959	-0.466834	-0.0610897	-0.275012	-0.218844	0.186703
C1_00380C	CAALFM_C100380CA	-0.37065	-0.103341	-0.238155	-0.134372	-0.208179	0.00548227	-0.31273	-0.208365	0.0385381
C1_00390W	ENA2	1.9218	3.20245	1.75191	1.22532	2.34053	2.93542	2.19857	2.73364	0.965888
C1_00400W	SVF1	-0.208004	0.199082	-0.359434	0.112044	-0.48183	-0.0156679	-0.319775	-0.290367	0.0103372
C1_00410C	CAALFM_C100410CA	-0.09288	-0.640702	0.679125	-0.519411	-0.186868	-0.40804	0.239241	0.298268	-0.176261
C1_00420W	CAALFM_C100420WA	0.246162	-0.151181	0.284636	0.0701462	-0.188223	-0.240684	0.288796	0.0739422	-0.110996
C1_00430W	CAALFM_C100430WA	0.24611	0.181888	0.738393	0.1079	-0.0137542	-0.1626	0.150899	0.147476	-0.0616059
C1_00440W	UBP6	-0.254045	-0.14749	-0.199745	0.0810022	-0.0485151	0.0369812	-0.0746909	-0.0622302	0.0623391
C1_00450C	CAALFM_C100450CA	-0.711629	-0.591101	-0.693004	-0.331378	-0.491702	-0.322824	-0.52996	-0.286579	-0.100911
C1_00460W	CAALFM_C100460WA	-0.455829	-0.88749	-0.457971	-0.386109	-0.322668	-0.432748	-0.328224	-0.295677	-0.128822
C1_00470C	CAALFM_C100470CA	-0.127017	0.378669	-0.238602	0.219559	-0.0131952	0.16763	-0.187475	0.207004	0.0903852
C1_00480C	GCN20	-0.373189	-0.0554612	-0.679755	0.122398	-0.21983	0.18176	-0.280297	0.0100529	0.256712
C1_00490C	TTR1	0.0773809	-0.614058	0.279422	-0.394423	0.231506	-0.42771	-0.15458	-0.956161	-0.564865
C1_00500C	GLO1	-0.2455	-0.434389	-0.114035	0.0397869	-0.31825	-0.387169	-0.27135	-0.319892	0.0676212
C1_00510W	CAALFM_C100510WA	-0.814673	-0.832325	-1.06548	-0.378515	-0.594466	-0.388522	-0.808009	-0.464048	-0.0249315
C1_00520W	CAALFM_C100520WA	-0.238276	-0.0554632	-0.13681	-0.184864	0.0299828	-0.0759575	-0.298041	-0.388876	-0.159797
C1_00530C	CAALFM_C100530CA	0.266759	0.105501	0.105426	-0.285722	0.286651	-0.243594	0.243806	-0.0881853	-0.430967
C1_00540C	CAALFM_C100540CA	-0.140594	0.00567509	-0.49185	-0.0197143	-0.458882	-0.218176	-0.0308345	0.00426625	0.0515256
C1_00550W	CIS2	0.513786	0.305773	1.03044	-0.00867347	-0.219512	-0.562774	0.440295	-0.0189417	-0.388131
C1_00560W	CNS1	-0.591503	0.206773	-0.773462	0.26667	-0.575573	0.126127	-0.437841	0.125039	0.168449
C1_00570C	CAALFM_C100570CA	0.241289	0.253625	0.365555	-0.00348384	0.0468305	0.164256	0.22578	0.476707	0.288196
C1_00580W	CAALFM_C100580WA	0.559462	-0.0977406	1.35348	-0.548662	0.410331	-0.773815	0.532118	-0.00216589	-0.621439
C1_00590W	TUF1	-1.27263	-1.74051	-1.93099	-1.26669	-1.0668	-1.24319	-0.995506	-1.16768	-0.691234
C1_00600W	APC1	0.37793	0.0316234	0.311185	0.0248021	0.354322	0.140035	0.457212	0.172764	-0.0372966
C1_00610W	PSD1	0.159631	0.179406	0.0731318	-0.0279956	-0.0538901	-0.243039	0.218468	-0.0857533	-0.0335535
C1_00620W	MOB2	0.262404	0.326484	0.363051	-0.0765243	0.430165	-0.217664	0.275404	0.010909	-0.240731
C1_00630W	CAALFM_C100630WA	0.73835	0.923832	0.878864	0.911283	0.585219	0.614151	0.822614	0.909707	0.209976
C1_00640C	RPO41	-0.67978	-0.218926	-1.38618	-0.170168	-0.636582	-0.184036	-0.51824	-0.115837	0.0227634
C1_00650C	SNF7	-0.0535891	0.0181947	0.0728217	-0.194707	-0.00917116	-0.270954	0.0224848	-0.191197	-0.102263
C1_00660C	CAALFM_C100660CA	0.0202099	-0.349625	0.297311	-0.28451	0.124138	-0.401782	0.0623618	-0.193831	-0.160952
C1_00670C	UGA32	0.704179	0.230677	0.839088	-0.308852	0.614184	0.158148	0.999031	0.99515	-0.0904283
C1_00680W	ASM3	1.26677	1.3675	0.428741	0.557735	0.689513	1.2178	1.29723	1.4925	0.474626
C1_00690W	RIC1	0.0155413	-0.356507	-0.103921	-0.103013	0.0609833	-0.047614	0.171762	0.150365	0.0311159
C1_00700W	CAALFM_C100700WA	-0.580175	-1.47581	-1.34092	-0.930586	-0.726435	-0.681595	-0.514211	-0.646791	-0.393566
C1_00710C	TUB2	0.436985	0.329555	0.434195	0.28945	0.417776	0.151777	0.398817	-0.0996599	-0.0105959
C1_00730C	CMP1	-0.0737111	-0.250535	-0.200969	-0.243277	-6.6e-05	-0.227433	-0.0224643	-0.293191	-0.204337
C1_00740C	SPE1	-0.436132	-0.546484	-0.927559	-0.365076	-0.141332	-0.133032	-0.37005	-0.262733	-0.191405
C1_00750C	VPS27	0.29118	0.358214	0.488365	0.0427283	0.311399	0.119096	0.358907	-0.044456	0.065999
C1_00760W	CAALFM_C100760WA	0.0632159	0.209455	0.428502	-0.0171881	0.299924	0.0608904	0.222005	0.0013405	-0.00554284
C1_00770C	ROT1	-0.534594	0.013511	-0.998592	0.209815	-0.492871	0.132832	-0.457472	-0.187439	0.384437
C1_00780C	HGC1	4.66432	4.45012	4.74147	3.44464	4.26987	3.18926	4.09725	1.21621	0.0016748
C1_00790W	CAALFM_C100790WA	0.316151	-0.327507	0.500328	0.0451122	0.196055	-0.270791	0.272659	0.466843	0.235629
C1_00800C	ERG2	-0.471635	-1.13045	-0.99474	-0.856987	-0.22461	-0.75072	-0.643622	-0.980657	-0.611078
C1_00810W	CAALFM_C100810WA	-0.504351	-1.26297	-0.428981	-0.457709	-0.0145345	-0.432388	-0.467049	-0.929149	-0.216911
C1_00820W	CAALFM_C100820WA	0.391154	0.0881598	0.304527	-0.155995	0.557938	0.221397	0.475855	0.230201	-0.0296157
C1_00830W	CAALFM_C100830WA	0.859978	1.30558	1.01071	0.624986	0.608383	0.605198	0.819588	0.827746	0.0389497
C1_00840C	NRM1	0.117413	-0.470628	-0.00720857	-0.296177	0.314338	-0.219925	0.107236	0.0332754	-0.100633
C1_00850W	IHD2	3.32345	2.9128	3.30624	2.08967	3.4989	1.99411	3.00623	1.72033	0.0535193
C1_00860W	CAALFM_C100860WA	0.433708	0.379863	0.862151	-0.219397	0.435354	-0.282267	0.488625	0.273862	-0.291978
C1_00870W	LRO1	0.561079	0.539944	0.579384	0.493667	0.52377	0.350782	0.596608	0.563317	-0.113027
C1_00880W	CAALFM_C100880WA	0.532138	0.281814	1.72515	0.558768	1.1372	1.86763	0.593386	1.03075	0.512552
C1_00890W	CAALFM_C100890WA	-0.0323122	-0.0571779	-0.0249139	0.126571	-0.0318657	0.164438	0.282771	0.395744	0.272124
C1_00900W	RRS1	-0.520813	0.440494	-1.1499	0.148373	-0.575309	0.220655	-0.499344	0.0453409	-0.00532394
C1_00910W	CAALFM_C100910WA	-0.26641	-0.606705	0.220381	-0.809612	0.0533382	-0.787067	-0.128561	-0.431899	-0.508496
C1_00920W	CAALFM_C100920WA	0.347376	0.156164	0.496828	0.0193523	0.549118	0.105289	0.308639	-0.0456716	-0.0486023
C1_00930C	SIN3	-0.226167	-0.124578	-0.284922	-0.018658	-0.242933	-0.0741287	-0.031983	0.14701	0.0117863
C1_00940W	RPB11	-0.658487	-0.651222	-0.682346	-0.458452	-0.33474	-0.559105	-0.561263	-0.506092	-0.285377
C1_00950C	CDC5	0.0241351	-0.326168	0.0405314	-0.727014	-0.0167793	-0.380418	0.0870036	-0.316117	-0.380315
C1_00960C	SET1	0.00485208	-0.0630446	0.237918	0.01197	0.0703717	0.0485027	0.111049	-0.0452225	0.09618
C1_00970W	CAALFM_C100970WA	-0.216636	-0.139995	-0.257841	0.00498201	-0.220573	-0.0875138	-0.0787482	0.0427172	0.119594
C1_00980W	CAALFM_C100980WA	-0.759664	-1.10522	-1.16951	-0.76102	-0.58041	-0.832857	-0.690375	-0.69655	-0.366829
C1_00990C	NMA111	-0.440159	0.297503	-0.943698	0.218927	-0.407095	0.178061	-0.405014	-0.0253909	0.0637396
C1_01000C	CAALFM_C101000CA	-0.240269	-0.44544	-0.223717	-0.516433	-0.207755	-0.461408	-0.250434	-0.088657	-0.215488
C1_01010W	CAALFM_C101010WA	-0.447548	-0.834546	-0.778612	-0.321017	-0.712363	-0.479911	-0.217158	-0.027861	-0.0427562
C1_01030W	HMT1	-0.85509	0.00694471	-1.76234	-0.0515695	-1.01759	-0.199505	-0.838191	-0.183122	-0.0610811
C1_01040W	CAALFM_C101040WA	0.497521	0.643821	0.890883	0.284107	0.60525	0.210717	0.680831	-0.0180178	-0.490158
C1_01050C	CAALFM_C101050CA	-0.472308	-0.592866	-0.577108	-0.358987	-0.200231	-0.392755	-0.429693	-0.45327	-0.274186
C1_01060W	MBF1	-0.581123	-0.673516	-0.537237	-0.381122	-0.23997	-0.287492	-0.401003	-0.427681	0.0127457
C1_01070C	CAALFM_C101070CA	-0.165656	-0.0902239	-0.0373853	-0.172814	-0.326845	-0.0898537	0.0468059	0.132983	0.0178799
C1_01080W	CAALFM_C101080WA	0.179984	0.057128	0.355501	0.169952	0.0338616	0.00677062	0.349688	0.399428	0.179822
C1_01090C	CAALFM_C101090CA	-0.7782	-1.01287	-1.08455	-0.540043	-0.618549	-0.530531	-0.664093	-0.687073	-0.0855677
C1_01100W	CCH1	0.386713	0.728322	0.281672	0.465807	0.405956	0.31296	0.485439	0.220126	0.540608
C1_01110C	ZPR1	-0.769402	0.123821	-1.7129	-0.00744445	-0.957794	0.100176	-0.75853	-0.105698	0.0999613
C1_01130W	CAALFM_C101130WA	0.340373	1.54111	-0.133071	0.215029	-0.539101	-0.0315786	0.611094	0.533935	0.401212
C1_01140C	CAALFM_C101140CA	0.574722	0.765853	0.910055	0.782793	0.299307	0.0736735	0.551136	0.176898	0.0314705
C1_01150C	CAALFM_C101150CA	-0.726431	-0.0259901	-1.32208	0.151228	-0.69525	0.11592	-0.645282	0.00776411	0.194172
C1_01160C	CAALFM_C101160CA	-0.423323	0.306426	-0.930793	0.326952	-0.717097	0.153713	-0.421552	0.156858	0.146295
C1_01170C	ZCF17	-0.505028	-0.0402649	-0.663513	-0.00727165	-0.416115	-0.0367934	-0.459398	-0.236781	-0.0111355
C1_01180C	CAALFM_C101180CA	0.201559	-0.452102	0.606852	-0.173024	0.269533	-0.575065	0.257961	-1.35514	-0.897925
C1_01190C	CAALFM_C101190CA	-0.0487561	-0.371281	0.0537856	-0.137153	0.129089	-0.203638	0.0769488	-0.150168	-0.102417
C1_01200W	STB5	-0.143733	-0.763957	0.268596	-0.578873	-0.023139	-0.5717	0.0439369	-0.404374	-0.134735
C1_01210W	CAALFM_C101210WA	-0.287359	0.890018	-0.173885	0.30549	0.111285	0.361741	-0.512377	-0.621397	-0.00183275
C1_01220C	CAALFM_C101220CA	3.01904	2.80339	3.90554	1.99087	1.82583	1.33939	2.70243	2.58566	0.021168
C1_01240W	IFD3	0.937743	0.653049	0.589492	0.707742	0.137931	0.416424	1.3129	1.77193	0.0337471
C1_01250W	CAALFM_C101250WA	-0.988653	-1.16091	-1.24247	-0.861357	-0.659971	-0.611379	-0.666851	-0.641051	-0.241523
C1_01260C	TRS20	0.229664	-0.401808	0.423652	-0.331425	0.266904	-0.221616	0.0570639	-0.2781	-0.231687
C1_01270W	CTA9	0.088791	-0.736069	0.565663	-0.63627	0.086359	-0.574494	0.0993661	-0.305867	-0.189064
C1_01280C	MED22	-0.0703585	-0.290041	-0.0474846	-0.132397	0.0001463	-0.0673046	-0.100088	-0.176521	-0.218
C1_01290C	CAALFM_C101290CA	0.900883	0.634079	1.078	0.021606	0.668218	0.0890263	0.658722	0.226093	0.154965
C1_01300W	CAALFM_C101300WA	-0.253395	-0.501611	-0.301826	-0.491762	-0.249517	-0.410228	-0.249337	-0.42571	-0.07561
C1_01320W	MRS7	-0.596437	-0.62677	-0.788284	-0.31546	-0.656865	-0.249704	-0.362858	-0.162623	0.0184943
C1_01330C	DUT1	-0.17107	-0.991387	-0.563848	-0.942372	-0.0475283	-0.790382	-0.346855	-0.674256	-0.757053
C1_01340C	CAALFM_C101340CA	0.905791	0.222959	1.43785	0.119652	0.982045	0.0719392	1.06125	0.643035	-0.0472571
C1_01350C	TIF	-0.744371	-0.482353	-1.0586	-0.281245	-0.5501	-0.221836	-0.692282	-0.447698	-0.0659601
C1_01360C	CAALFM_C101360CA	1.09121	2.05832	1.25453	0.773594	0.685812	0.195676	0.869909	0.865029	0.122673
C1_01370C	RPS21B	-0.620073	-0.737006	-1.04222	-0.335611	-0.420128	-0.230964	-0.678055	-0.538076	0.188236
C1_01380C	TRM2	-0.513112	0.621422	-1.08711	0.234935	-0.646182	0.24902	-0.460013	0.313185	0.202733
C1_01390C	CAALFM_C101390CA	0.209455	0.305038	0.294434	-0.115846	-0.00265081	-0.207766	0.250782	-0.252876	-0.219197
C1_01400C	CAALFM_C101400CA	0.183114	0.451802	0.294027	-0.111496	0.251989	-0.207293	0.179227	-0.103485	-0.189867
C1_01420C	CRL1	-0.218234	0.414129	-0.0922729	0.412373	0.0061036	0.498266	-0.289372	-0.326414	0.422831
C1_01440C	POX18	0.15384	0.324895	0.562513	-0.3172	-0.334115	-0.862637	0.524315	0.0711285	-0.294097
C1_01450W	ABC1	-0.180267	0.799719	-0.756602	0.577463	-0.619717	0.42324	0.139858	0.763348	0.547038
C1_01460W	CAALFM_C101460WA	0.208888	0.509564	0.781007	0.220324	0.455128	0.218442	0.201375	0.104155	-0.0348146
C1_01470W	CAALFM_C101470WA	-0.586551	-0.0367941	-0.866704	-0.242038	-0.603495	-0.125385	-0.438114	-0.127473	0.122462
C1_01480C	RPS21	-0.991662	-0.895605	-1.42047	-0.473795	-0.641998	-0.481137	-0.793738	-0.56329	-0.0047093
C1_01490W	CAALFM_C101490WA	0.0801968	0.289151	0.42946	0.473588	0.0453562	0.401457	0.5448	0.859958	0.0409197
C1_01510W	CAALFM_C101510WA	0.789736	1.60168	-2.99279	3.1805	-2.32965	2.41104	1.60967	-1.3164	1.73065
C1_01520C	SOD2	-0.813947	-1.12735	-0.510122	-0.575692	-0.654689	-0.521624	-0.536651	-0.482926	-0.227164
C1_01530C	CAALFM_C101530CA	-0.765214	-0.160965	-1.23041	-0.0030285	-0.750036	0.0186772	-0.611451	-0.136977	0.185495
C1_01540W	CAALFM_C101540WA	0.1375	0.0944766	0.220633	0.27112	0.0392814	0.122362	0.219079	0.211713	0.124133
C1_01550W	VPS17	0.194767	0.230127	0.340028	0.283419	0.223955	0.209836	0.298187	0.278498	0.169786
C1_01560W	SIZ1	0.219112	0.210714	0.254434	0.00855688	0.173324	0.0602826	0.167919	-0.0450695	-0.0428816
C1_01570C	RPB7	-0.592707	-0.818747	-0.583456	-0.639464	-0.380425	-0.799737	-0.447626	-0.600079	-0.314878
C1_01580W	CAALFM_C101580WA	-0.861581	-1.00512	-1.30821	-0.513728	-0.630865	-0.452173	-0.716755	-0.584154	-0.063487
C1_01590C	CAALFM_C101590CA	-0.499916	-0.460043	-0.637795	-0.241236	-0.39315	-0.240817	-0.303366	-0.226684	-0.0510506
C1_01600W	MRP20	-1.18372	-1.13623	-1.91899	-0.673138	-1.14045	-0.63411	-1.00851	-0.651032	-0.171826
C1_01610C	CAALFM_C101610CA	0.745642	0.521008	2.15239	-0.203811	0.867296	-0.182695	0.684603	-0.0332553	-0.630047
C1_01620C	CAALFM_C101620CA	-0.603608	-0.259116	0.329395	-0.606067	-0.239181	-0.613957	-0.538518	-0.663495	-0.731348
C1_01630W	CAALFM_C101630WA	-0.301612	-0.575863	0.144538	-0.690893	-0.153577	-0.885769	-0.411209	-0.345703	-0.71174
C1_01640W	RPS42	-0.837836	-1.15512	-1.80123	-0.950574	-0.632372	-0.283197	-0.667945	-0.367151	0.0172738
C1_01650W	ISN1	0.435032	0.309329	0.526815	0.205216	0.63396	0.0275418	0.497671	-0.0821703	-0.0207659
C1_01670C	ESP1	0.124087	-0.411229	0.173297	-0.143208	0.0859225	-0.0893118	0.111993	-0.164528	-0.160136
C1_01680C	CAALFM_C101680CA	-0.971614	-1.45274	-1.36448	-1.03232	-0.796649	-1.0218	-0.890673	-0.982927	-0.481163
C1_01690C	LSC1	-0.706211	0.0212349	-0.695008	-0.1813	0.0475762	0.0288388	-0.495332	-0.387445	-0.291313
C1_01700W	ARP8	-0.24699	0.117335	-0.503658	-0.0077502	-0.299062	0.18258	-0.12076	0.201888	0.205085
C1_01710W	CAALFM_C101710WA	1.10651	2.03169	0.908269	1.92589	0.216049	1.38517	1.11703	1.13881	0.752435
C1_01740W	CTN1	3.43439	2.53796	6.90602	2.56773	1.82833	1.45052	4.38999	2.4559	1.24622
C1_01750W	CAALFM_C101750WA	-0.906646	0.120914	-0.274415	0.164231	-0.511136	-0.0500957	-1.14047	-0.485921	0.249096
C1_01760W	FGR38	0.811058	0.270075	1.18463	0.499124	0.818623	0.290612	0.87928	0.336397	0.0222921
C1_01770W	MAK32	0.02333	0.0818307	0.211916	0.0178308	0.0103854	0.0578143	0.182382	0.282678	0.066189
C1_01780C	HOL4	1.24241	1.07623	1.72157	0.391414	1.02842	1.3504	0.934288	0.690661	0.167472
C1_01790W	SWI4	-0.149189	0.060731	-0.324158	-0.161443	-0.3359	-0.0763088	-0.0877778	0.104177	0.0708727
C1_01800W	CAALFM_C101800WA	0.0255904	-0.332797	-0.0372419	-0.0966234	0.156236	-0.0998578	-0.164775	-0.214513	-0.220239
C1_01810C	UGA2	1.41952	1.43585	1.93664	1.37513	1.41869	1.42679	1.5723	1.46934	0.0377463
C1_01820C	CAALFM_C101820CA	-0.386696	-0.0429396	-0.323619	0.0983852	-0.169569	0.161887	-0.24464	0.315268	0.158695
C1_01830C	UBC8	0.414365	0.50395	1.1246	0.159671	0.404905	-0.0647818	0.325888	-0.157893	-0.0927807
C1_01840C	CAALFM_C101840CA	1.94741	1.01493	2.61573	1.03718	1.70939	0.752606	2.35555	2.20032	-0.241243
C1_01850C	CAALFM_C101850CA	-0.34504	0.296541	-0.458851	0.0421186	-0.302981	0.0232928	-0.170405	0.0521246	0.139681
C1_01860W	CAALFM_C101860WA	-0.479898	-0.686932	-0.480377	-0.394213	-0.184549	-0.227898	-0.414163	-0.44903	-0.210742
C1_01870C	CYS4	-0.506428	0.126187	-0.890478	-0.0681574	-0.710851	-0.174866	-0.17874	0.305187	0.0560347
C1_01880C	PTR3	0.568308	0.989512	0.59926	0.445402	0.525352	0.644035	0.568525	1.017	0.52421
C1_01890C	CAALFM_C101890CA	0.589981	0.437109	0.757914	-0.129184	0.483919	-0.190422	0.450478	0.171839	-0.159279
C1_01900C	CAALFM_C101900CA	-0.222336	-0.0122178	-0.367777	0.0626739	-0.197974	0.134915	-0.0781418	0.00425317	0.0841894
C1_01910W	CAALFM_C101910WA	-0.70914	-0.356428	-1.50001	-0.270955	-0.981095	-0.232211	-0.569396	-0.119289	0.0252125
C1_01920W	ROA1	0.47469	0.158014	-1.85957	-1.5388	-1.66153	-1.36561	0.782338	0.981314	-0.217319
C1_01930W	CAALFM_C101930WA	3.00317	4.13267	3.67469	2.26925	2.00167	1.1338	2.30778	1.10153	0.301257
C1_01940C	CAALFM_C101940CA	-0.279209	-0.552215	-0.268186	-0.227751	-0.189358	-0.42887	-0.297567	-0.360724	-0.166137
C1_01950C	CAALFM_C101950CA	-0.38673	-0.105318	-0.200194	-0.136222	-0.234164	-0.167862	-0.24901	-0.272871	-0.12411
C1_01970W	CAALFM_C101970WA	-1.14553	-2.41088	-1.00513	NAME?	NAME?	NAME?	-2.39417	-0.884819	-1.62916
C1_01980W	HGT1	4.99941	4.28395	4.68709	2.99554	3.53157	3.3788	4.85619	4.22297	2.11673
C1_01990W	HSP30	3.62968	0.117842	1.66446	1.0462	-0.365471	-0.68548	1.85037	0.689608	-0.40326
C1_02000W	CAALFM_C102000WA	0.0557753	-0.240285	0.301134	-0.431247	0.35684	-0.617848	0.0446906	-0.286114	-0.548999
C1_02010C	ZCF24	0.447863	-0.384093	0.952827	-0.0302904	0.584796	-0.290879	0.384605	0.0581551	-0.38453
C1_02020W	CAALFM_C102020WA	0.159067	-0.0180845	0.298089	0.448627	0.314183	0.363203	0.288957	0.323271	0.184017
C1_02030C	CAALFM_C102030CA	-0.0643859	-0.268991	-0.0291534	-0.0895793	0.0291227	-0.267376	-0.0861381	-0.0606509	0.173131
C1_02040C	CAALFM_C102040CA	-0.0657034	-1.449	-0.0888127	-1.16119	-0.0278638	0.0016124	0.0550102	-1.01675	-0.437307
C1_02050C	PHO91	0.559677	1.20533	0.411318	0.924519	0.452396	1.00159	0.686729	0.94225	0.223329
C1_02060W	CAALFM_C102060WA	0.462243	-0.401297	0.741842	-0.498031	0.627794	-0.216141	0.620334	-0.0601904	-0.352379
C1_02070W	HSP31	1.02365	-0.717718	-0.944987	-0.387207	-1.1714	-0.967534	0.807704	0.661061	-0.446064
C1_02080W	SET6	-0.710313	0.697834	-1.24792	0.381398	-0.673819	0.468984	-0.459596	0.267782	0.325737
C1_02090C	CAALFM_C102090CA	-0.476817	0.415059	-0.740192	0.322237	-0.404049	0.361664	-0.333393	0.383596	0.385596
C1_02100W	CAALFM_C102100WA	0.919497	0.307458	1.10082	0.322321	0.773398	0.0950628	0.824971	0.270621	-0.0853502
C1_02110C	HGT2	2.36949	0.672381	3.06841	-0.42975	0.15354	-0.849426	2.49467	1.44052	-1.17322
C1_02120C	SHA3	2.06602	3.41173	0.474952	2.01448	0.975591	2.60354	2.30864	3.14666	2.8702
C1_02130C	GAL1	2.31711	0.49292	1.95135	0.324943	0.581133	0.127882	2.18664	1.97328	0.689959
C1_02150W	GAL10	3.39569	1.67496	2.88071	0.793681	1.16706	0.093243	3.366	3.01269	0.816311
C1_02160W	CAALFM_C102160WA	0.183368	-0.140885	0.418197	0.156656	0.426602	0.150798	0.292074	0.264223	0.150137
C1_02170C	GAL102	0.840601	0.303657	0.956745	0.0269451	0.475947	-0.318132	1.0114	0.957092	-0.127759
C1_02180W	GAL7	0.640719	-0.153887	0.330469	-0.388832	-0.251366	-0.435546	0.859228	0.960662	0.628756
C1_02190W	ABP140	-0.431992	0.312927	-1.04759	0.281783	-0.51732	0.213522	-0.439555	-0.110681	0.0620657
C1_02200C	CAALFM_C102200CA	0.693143	0.690691	1.04805	0.518484	0.449159	0.319463	0.804749	0.729194	0.544543
C1_02210W	CAALFM_C102210WA	0.569322	0.647871	0.870233	0.375345	0.290485	0.576238	0.814243	0.919636	0.288649
C1_02220C	CAALFM_C102220CA	0.90874	0.991865	0.768641	-0.0441468	0.604387	0.0958108	0.786408	0.263469	0.0492829
C1_02240W	CAALFM_C102240WA	-0.0567073	0.126915	-0.351856	0.0986497	-0.166484	0.040716	-0.0990813	0.00550771	0.131838
C1_02250W	CWH8	1.34142	0.989828	0.99905	1.76068	0.496871	0.587567	1.43314	1.11287	-0.473112
C1_02260C	AGE3	-0.322153	-0.789326	-0.530131	-0.70057	-0.249522	-0.636093	-0.283034	-0.533583	-0.559877
C1_02270C	CAALFM_C102270CA	4.31176	-0.537935	3.41805	-0.0289703	0.472758	-0.055623	4.63484	5.30084	-0.11879
C1_02280C	PSY2	0.0328872	-0.10291	0.230468	0.00417551	0.120373	0.106892	0.133787	0.19731	0.0984932
C1_02290C	CAALFM_C102290CA	-0.670647	-0.794308	-1.12142	-0.500337	-0.596716	-0.42512	-0.499691	-0.456586	-0.170286
C1_02300W	CAALFM_C102300WA	-0.2626	-0.823352	-0.403801	-0.521492	-0.0989572	-0.333527	-0.195052	-0.504625	-0.360965
C1_02310C	CAALFM_C102310CA	-0.15115	-0.168258	-0.20693	-0.160573	-0.151677	-0.0320652	-0.19281	-0.163882	-0.12208
C1_02320C	CAALFM_C102320CA	0.0488405	-0.364101	0.527103	-0.257754	-0.106319	-0.244924	0.350731	0.131863	-0.0354851
C1_02330C	CAALFM_C102330CA	-1.25951	-1.17427	-1.9776	-0.858656	-0.973058	-0.738175	-1.12298	-1.0517	-0.212682
C1_02350W	TIM21	-1.14294	-1.22205	-1.67018	-0.717787	-0.992625	-0.681109	-0.989194	-0.682608	-0.335652
C1_02360C	PGA5	-0.746869	-1.39726	-1.3411	-0.805309	-1.10378	-0.977488	-0.90159	-0.874835	-0.429292
C1_02370C	CAALFM_C102370CA	0.266793	-0.119746	0.608986	-0.0557411	0.381599	-0.0438762	0.376639	0.326488	-0.0325459
C1_02380C	CAALFM_C102380CA	-0.0266277	0.00655435	0.315698	-0.310167	0.0155769	-0.241354	0.0505517	-0.0597884	-0.225918
C1_02390W	CAALFM_C102390WA	0.175675	0.259859	0.264088	0.000335833	0.158284	0.370722	0.379521	0.406121	0.0156106
C1_02400C	MNN11	-0.227235	-0.724821	-0.603115	-0.795683	-0.139805	-0.864603	-0.38785	-0.987197	-0.725829
C1_02410C	CAALFM_C102410CA	-0.357074	-0.684221	-0.379421	-0.670442	-0.328363	-0.732349	-0.268948	-0.522287	-0.44732
C1_02420C	GSC1	-0.0354509	0.430057	-0.439192	0.387038	-0.215874	0.0423997	0.0341775	0.111733	0.100201
C1_02430C	CAALFM_C102430CA	-0.867485	-0.564341	-1.23939	-0.492824	-0.756784	-0.361056	-0.713556	-0.457478	0.00282236
C1_02440C	CAALFM_C102440CA	-0.557028	-0.664072	-0.446026	-0.443163	-0.493103	-0.448746	-0.355988	-0.664067	-0.379474
C1_02450C	CAALFM_C102450CA	-0.959926	-0.0395116	-2.07668	-0.379314	-1.21751	-0.413169	-0.979175	-0.713879	-0.553762
C1_02460W	RPL10	-0.915426	-0.825167	-1.34663	-0.426394	-0.760669	-0.374003	-0.820222	-0.599508	-0.00934276
C1_02470W	CAALFM_C102470WA	0.408835	0.169454	1.13875	-0.123318	0.484674	-0.231739	0.461698	0.463105	-0.524042
C1_02480W	PMM1	-0.450955	-0.690921	-0.514387	-0.427375	0.0466542	-0.262728	-0.417312	-0.800967	-0.485404
C1_02490C	CAALFM_C102490CA	-0.740119	-1.31278	-1.44771	-0.651075	-0.924927	-0.473606	-0.496423	-0.386416	-0.090651
C1_02500W	CAALFM_C102500WA	0.240778	-0.96261	0.471011	-0.488868	0.225438	-0.680808	0.114891	-0.221514	-0.389486
C1_02510W	CAALFM_C102510WA	0.138993	-0.420925	0.374415	-0.222407	0.294288	-0.218553	0.23458	-0.0108431	-0.163844
C1_02520W	SCW4	2.71919	1.97995	8.34429	1.44661	-0.128549	0.876143	2.87109	3.53708	1.11276
C1_02530C	DIP5	0.380543	0.599142	1.03895	-0.437234	-0.764885	-0.576845	0.578468	1.01128	0.356744
C1_02570C	PUT4	0.686212	2.20652	0.304045	0.5706	0.064706	0.269053	0.68172	1.03012	0.373066
C1_02580W	HNM4	1.28631	3.30082	1.99831	1.5448	0.758869	1.09247	1.35053	1.29317	0.0291738
C1_02590C	SNZ1	0.1284	0.497697	1.1913	2.05802	1.17316	1.31132	0.448115	0.767596	0.235826
C1_02600W	SNO1	-0.18669	0.0121583	0.941036	1.1658	0.728085	0.812761	-0.101208	0.299293	0.148929
C1_02610W	IML1	0.125326	0.252985	0.35014	0.272731	0.0267089	0.216616	0.207493	0.220562	0.176578
C1_02620C	HOM6	-0.825227	-0.0374415	-0.54453	-0.297085	-0.399436	-0.323627	-0.601222	-0.587225	-0.154359
C1_02630C	EXG2	1.59562	0.78884	1.59126	0.375796	2.06203	1.559	1.27423	-0.894738	-0.0288193
C1_02640C	TOM20	-0.914318	-0.889317	-1.15767	-0.590153	-0.750581	-0.447978	-0.768361	-0.585988	-0.0690315
C1_02650W	CAALFM_C102650WA	-0.829415	-1.40825	-1.24997	-0.684563	-0.977844	-0.732262	-0.599651	-0.424121	-0.332091
C1_02660C	MGM101	-0.768581	-0.592376	-0.998222	-0.407193	-0.691611	-0.449715	-0.526563	-0.335857	-0.107362
C1_02670C	CAALFM_C102670CA	1.20125	1.50282	0.458501	1.45204	0.303305	1.27866	1.42901	1.68117	0.974307
C1_02680C	CAALFM_C102680CA	1.17526	0.728459	1.25736	0.597519	1.07461	0.840114	1.30695	0.995371	0.311799
C1_02690C	CAALFM_C102690CA	1.87466	1.18449	1.64775	1.63801	-0.229332	0.618316	0.441684	-1.16842	-0.00829109
C1_02700C	CAALFM_C102700CA	1.7359	1.19237	2.03112	1.13427	1.68582	2.13118	1.58263	-0.0740774	1.42451
C1_02710W	FRS2	-0.555776	-0.210089	-0.656843	0.0377009	-0.335427	0.0802014	-0.375943	-0.261661	0.0805271
C1_02720W	CAALFM_C102720WA	-0.244225	-0.16075	-0.402072	-0.23226	-0.229593	-0.0134465	-0.117619	0.0994782	0.0729862
C1_02730W	CAALFM_C102730WA	1.0801	0.405931	1.04043	0.292645	0.520443	0.838161	0.749815	0.525578	0.697766
C1_02740C	CAALFM_C102740CA	0.330174	0.0787267	0.553927	-0.193836	0.395737	-0.164563	0.243506	0.373416	0.120407
C1_02750C	CAALFM_C102750CA	-0.439432	-0.369748	-0.599087	-0.324158	-0.292036	-0.289306	-0.245185	-0.355501	-0.115229
C1_02760W	CAALFM_C102760WA	-0.235739	-0.424313	-0.40805	-0.175135	-0.0813836	-0.142428	-0.0736782	-0.155628	-0.078813
C1_02770W	CAALFM_C102770WA	0.368308	0.335493	0.530791	0.438582	0.700207	0.533066	0.416821	0.0890559	-0.102813
C1_02780W	CAALFM_C102780WA	-0.0166251	0.74544	0.413865	0.455438	0.473709	0.417168	0.00668014	-0.10558	-0.149171
C1_02790W	TIF34	-0.806891	-0.306588	-1.27744	-0.225805	-0.569632	-0.10717	-0.687054	-0.270853	-0.000843041
C1_02800W	CAALFM_C102800WA	1.56458	0.837042	1.34556	0.961981	0.166239	0.884483	1.35198	1.36304	-0.267641
C1_02810W	RAD16	0.359714	0.699251	0.265055	0.413075	0.111951	0.604397	0.288586	0.679926	0.632754
C1_02820W	LYS2	-1.13815	0.400094	-0.733314	-0.0287205	-0.771418	0.00975598	-0.827298	-0.352482	0.261591
C1_02830W	CAALFM_C102830WA	-0.128184	-0.49923	-0.0694573	-0.254789	0.0515587	0.0289456	0.0137088	-0.0230166	0.00290163
C1_02840W	PDE2	0.111479	1.20521	-0.560302	1.05678	-0.398251	0.670454	0.475444	0.630991	0.430647
C1_02850W	CAALFM_C102850WA	-0.495273	0.359038	-0.843805	0.106489	-0.394401	-0.00314351	-0.320696	0.323709	-0.124478
C1_02860C	YKT6	0.0453245	-0.127388	0.0207561	-0.0995954	0.114096	-0.120399	0.0507573	-0.22695	-0.295644
C1_02870W	YPT7	0.171171	0.217251	0.257745	0.045985	0.27323	0.146611	0.148484	-0.107558	-0.115076
C1_02880C	MIA40	-1.33683	-1.49048	-1.92777	-0.997412	-1.35219	-0.934147	-0.959279	-0.654383	-0.167126
C1_02890C	CAALFM_C102890CA	-0.0833798	-0.196053	-0.478203	-0.493387	-0.589693	-0.561943	0.173336	0.58374	-0.134542
C1_02900C	CAALFM_C102900CA	-0.102504	0.434785	-0.270188	0.419009	-0.182498	0.462755	-0.0225484	0.494647	0.385686
C1_02910C	CAALFM_C102910CA	0.231189	0.46828	0.836991	0.217136	0.686481	0.353172	0.190874	0.299179	0.135626
C1_02920W	CDC73	-0.73999	-0.662235	-0.787021	-0.585721	-0.434728	-0.530017	-0.502664	-0.47602	-0.165676
C1_02930C	MST1	-0.908388	-1.04126	-1.39825	-0.499058	-0.775424	-0.491431	-0.67295	-0.455326	-0.130904
C1_02940C	CAALFM_C102940CA	0.0971557	-0.117485	0.463773	-0.114154	0.20981	-0.195789	0.282897	0.102109	-0.0390835
C1_02950W	CAALFM_C102950WA	0.677568	0.20947	1.26336	0.408379	0.589174	0.302448	0.866365	0.416621	-0.018182
C1_02960C	CAALFM_C102960CA	-0.19176	0.0753685	-0.214149	-0.252885	-0.0481064	-0.241442	-0.114869	-0.246113	-0.324922
C1_02970W	CAALFM_C102970WA	-0.928565	-0.065365	-0.288732	0.0161057	-0.517841	-0.294755	-0.795712	-0.866142	-0.0806559
C1_02980W	GOR1	-0.205419	1.12882	0.525621	0.00090778	-1.07511	-0.844674	0.23804	0.0266153	-0.0979865
C1_02990C	XOG1	2.20986	3.03345	3.04645	2.11548	2.28929	2.44763	2.17979	2.76225	0.322443
C1_03000W	HOL1	0.486895	0.726075	1.04358	0.700956	0.734214	0.549549	0.58381	0.614923	-0.00745934
C1_03010W	RPP1A	-1.05439	-1.01666	-1.60299	-0.646761	-0.917998	-0.59977	-0.955869	-0.750291	0.0872847
C1_03020C	RPL13	-1.04646	-0.868697	-1.44956	-0.612185	-0.694083	-0.548738	-0.84903	-0.736761	-0.0877149
C1_03030W	RPS16A	-0.799396	-0.777664	-1.23833	-0.296754	-0.541126	-0.263565	-0.682912	-0.465063	0.0399355
C1_03040W	CAALFM_C103040WA	0.0499216	0.151329	0.119904	0.518524	0.218833	0.248203	0.189223	0.263379	0.041626
C1_03050W	CAALFM_C103050WA	-0.098563	0.168984	0.106245	0.139876	-0.0860317	0.0541702	-0.124874	-0.00254533	0.0079528
C1_03060C	TSR2	-0.683294	0.125951	-1.26924	0.270707	-0.604455	0.196652	-0.553264	0.118865	0.103114
C1_03070C	ORC1	-0.264876	-0.406601	-0.327068	-0.329426	0.0104964	-0.230611	-0.210381	-0.372443	-0.240217
C1_03080C	TEM1	0.00568015	-0.351609	0.449241	-0.206727	0.162742	-0.417835	0.0388811	-0.244026	-0.483226
C1_03090W	RPS1	-0.892634	-0.747448	-1.28778	-0.314501	-0.534578	-0.215809	-0.734594	-0.506419	0.120491
C1_03100W	CAALFM_C103100WA	0.516936	0.665205	0.898096	0.501509	0.614665	0.55125	0.436712	-0.104723	0.120142
C1_03110W	RPL6	-0.895725	-0.688535	-1.39444	-0.277462	-0.630825	-0.251092	-0.760998	-0.340719	0.153309
C1_03120W	CAALFM_C103120WA	1.02104	0.790095	1.51648	0.490475	0.388546	0.120991	1.00312	0.87675	0.138461
C1_03130C	GGA2	-0.0365522	0.0612309	-0.134009	0.0534046	-0.132634	0.102982	0.111649	0.235347	0.263646
C1_03140W	CAALFM_C103140WA	0.36153	0.275578	0.766559	0.475897	0.636346	0.321891	0.503662	0.43158	0.08518
C1_03150C	CAALFM_C103150CA	0.485183	0.213293	0.899209	0.0977331	0.468671	0.230423	0.73148	0.462185	-0.182465
C1_03160C	COQ4	-0.335815	-1.36041	-0.596579	-0.927114	-0.313736	-0.655975	-0.283293	-0.535369	-0.331996
C1_03170C	CAALFM_C103170CA	0.760542	0.499128	1.14855	0.199601	0.833571	0.0775147	0.679916	0.508098	-0.133226
C1_03180W	CAALFM_C103180WA	-0.279456	-0.293102	-0.338218	-0.109893	0.0388501	-0.00259806	-0.199585	-0.0303133	-0.0162998
C1_03190C	ECM33	0.31808	0.231623	0.113906	-0.248032	0.213538	-0.0917308	0.212879	-0.25735	-0.192024
C1_03200C	ARO80	-0.200052	-0.419044	0.0729263	-0.29246	0.178929	-0.051311	-0.010234	-0.0117973	-0.0480455
C1_03210C	CDC12	0.620912	0.181833	0.607095	0.0929591	0.535326	-0.00709055	0.591519	-0.15732	-0.0940654
C1_03220C	BMH1	-0.252388	-0.304543	-0.347534	-0.242915	-0.256871	-0.257957	-0.170636	-0.321684	-0.0104472
C1_03230C	ARX1	-0.800475	0.421713	-1.68652	0.248273	-0.880685	0.412452	-0.606203	0.30321	0.395572
C1_03240W	CAALFM_C103240WA	-0.449333	-0.0252212	-0.371636	-0.141932	-0.147614	-0.0577167	-0.447762	-0.237048	-0.071112
C1_03250C	SPP1	0.207492	0.44939	0.279334	0.329047	0.339041	0.278434	0.235968	0.268081	0.0687201
C1_03260W	CAALFM_C103260WA	0.362603	0.660056	0.57403	0.337081	0.309706	0.424517	0.358862	0.378944	0.227843
C1_03270W	CAALFM_C103270WA	1.85799	0.811893	1.59069	0.56773	0.785007	0.328124	1.66489	0.771205	0.168457
C1_03280W	CAALFM_C103280WA	-0.89597	-1.06366	-1.27331	-0.660673	-0.62414	-0.625659	-0.702447	-0.607258	-0.233552
C1_03290W	NGG1	0.0818758	0.0947835	0.0853906	-0.0470614	0.00545363	-0.0148434	0.213694	0.293259	0.144911
C1_03300C	MAS1	-0.865831	-0.962898	-1.23959	-0.640087	-0.729918	-0.581857	-0.723515	-0.491369	-0.292331
C1_03310W	CAALFM_C103310WA	-0.395045	-0.71896	-0.218247	-0.508227	-0.0928805	-0.630824	-0.29066	-0.528141	-0.449854
C1_03320C	EHD3	1.95775	-0.104219	2.91339	-0.0524796	0.968549	-0.212826	2.18973	2.03199	-0.458441
C1_03330C	CAALFM_C103330CA	0.789116	0.841881	1.26699	0.468487	0.747825	0.463649	0.773969	0.427662	0.0572836
C1_03340C	SEC62	0.252145	-0.352784	0.282463	-0.254492	0.509292	-0.410361	0.244776	-0.376802	-0.575782
C1_03350C	RLI1	-0.65577	-0.350585	-1.29529	0.0921774	-0.625947	0.166135	-0.50346	0.0045517	0.353291
C1_03360W	CAALFM_C103360WA	-0.53058	-0.345946	-0.762262	-0.24247	-0.395871	-0.2332	-0.391746	-0.311804	-0.0982981
C1_03370W	CAALFM_C103370WA	-1.27949	-0.458615	-2.09403	-0.431254	-1.3092	-0.393594	-1.15685	-0.593981	0.0462758
C1_03380W	TPS2	0.947921	0.978586	0.810296	0.729173	0.516444	0.367117	0.634053	0.123633	0.0528187
C1_03390W	EHT1	-0.858782	0.0129374	-0.65578	0.228636	-1.01724	-0.490884	-1.25611	-1.31733	-0.00302357
C1_03400W	CAALFM_C103400WA	0.0457639	0.729473	-0.164857	0.438434	-0.181208	0.279474	0.177514	0.38132	0.150917
C1_03410W	CAALFM_C103410WA	0.0234706	-0.460664	-0.076028	-0.35239	0.155599	-0.27635	-0.177581	-0.318215	-0.112932
C1_03430W	CAALFM_C103430WA	-0.00220835	-0.322518	0.475824	-0.200944	0.272564	-0.106355	0.0988022	-0.0765249	-0.128432
C1_03440C	CAALFM_C103440CA	-0.284842	-0.114493	-0.428853	-0.0376014	-0.272875	-0.0228706	-0.101578	0.119234	0.152137
C1_03450C	CAALFM_C103450CA	0.660396	0.322927	1.05329	0.281576	0.508332	0.239829	0.733078	0.402178	0.0554373
C1_03460C	CAALFM_C103460CA	-1.11301	-1.38042	-1.86374	-1.20499	-1.74949	-1.30687	-0.805616	-0.117848	-0.524295
C1_03470C	CAALFM_C103470CA	1.12896	0.802536	1.34941	0.506803	0.744521	0.440803	1.39701	0.731259	-0.674236
C1_03480C	AGE1	0.427315	0.196179	0.518495	0.344487	0.00692345	0.241835	0.386147	0.380686	0.24831
C1_03490W	CAALFM_C103490WA	0.350391	-0.47794	0.356604	0.0550117	-0.0997938	-0.458177	-0.141126	-0.348463	-0.582846
C1_03500W	YPT1	0.0481683	0.0235407	0.376558	0.0386147	0.255624	0.078394	0.127382	0.00846004	-0.0111952
C1_03510C	CAALFM_C103510CA	0.660543	-0.227826	0.95239	0.0034738	0.174515	-0.38973	0.319733	-0.442021	-0.37535
C1_03520W	RPN3	-0.382534	-0.325812	-0.288021	-0.152961	-0.253807	-0.146593	-0.191499	-0.238876	-0.0528009
C1_03530W	MED17	-0.286722	-0.451073	-0.208914	-0.176552	0.00113804	-0.156644	-0.215824	-0.28904	-0.118399
C1_03540C	CAALFM_C103540CA	-0.118844	-0.407441	-0.133211	-0.298655	0.0258234	-0.349361	0.0143284	-0.0650298	-0.251852
C1_03550C	COQ6	-0.381654	-0.69083	-0.719627	-0.675196	-0.529913	-0.572402	-0.508922	-0.891605	-0.424084
C1_03560C	SUA71	-0.270499	0.11252	-0.615626	0.0137802	-0.474228	-0.0315904	-0.205553	-0.176821	0.11601
C1_03600W	CAALFM_C103600WA	0.130546	-0.190082	0.0376925	-0.0207072	0.23678	-0.154663	0.149191	-0.0973151	-0.11131
C1_03610C	IMP1	-0.0817035	-0.20151	-0.0923306	0.0746473	0.114962	0.0540996	-0.0822861	0.119317	0.0582814
C1_03620C	CAALFM_C103620CA	-1.31256	-2.13699	-2.46152	-1.19123	-0.98673	-1.06719	-1.27564	-1.10807	-0.508206
C1_03630W	CAALFM_C103630WA	-0.18268	0.244014	-0.167936	0.390057	-0.0893627	0.310994	-0.175112	0.417114	0.345965
C1_03640C	HFL1	-0.217891	-0.720992	-0.124182	-0.477833	-0.0303867	-0.137648	-0.0357648	-0.0605814	-0.120184
C1_03650C	MRPL27	-0.834296	-0.990587	-0.984557	-0.552914	-0.508997	-0.524007	-0.643114	-0.545568	-0.109188
C1_03660W	CAALFM_C103660WA	0.78561	0.553653	1.49149	0.339463	0.954035	0.572475	0.869674	0.531268	-0.408847
C1_03670C	DAO1	0.0524376	0.0091265	0.62809	-0.0286096	-0.162425	-0.198101	0.280079	0.373695	0.00983241
C1_03680W	ENG1	-0.479168	-0.117284	-0.911629	-0.555501	-0.713525	0.0133627	-0.128448	0.498721	-0.426001
C1_03690W	CAALFM_C103690WA	-0.288246	-0.567811	-0.384035	-0.433799	-0.12191	-0.294942	-0.276023	-0.365764	-0.131957
C1_03710C	MSB1	0.409862	0.31621	0.217255	-0.154742	-0.00175742	-0.0818443	0.30811	-0.184312	-0.098027
C1_03720C	CAALFM_C103720CA	0.914677	0.464631	1.31671	0.349352	0.099059	-0.16254	0.954193	0.33302	-0.0745014
C1_03730C	MNS1	0.130581	-0.139297	0.315265	0.257058	0.410744	0.210525	0.260701	0.104404	-0.150907
C1_03740W	WAR1	-0.251372	0.123081	-0.0879968	-0.0774008	-0.243204	0.125459	-0.0605708	0.200201	0.0992523
C1_03750W	CAALFM_C103750WA	0.390838	-0.482123	0.413256	-0.150022	0.252468	-0.104979	-0.0263048	-0.614219	-0.145734
C1_03760C	STR2	-0.595195	-0.0192389	-0.595842	-0.194859	-0.248632	0.365122	-0.582051	-0.195751	0.0107228
C1_03770W	SKO1	-0.501588	-0.615421	-0.271826	-0.757138	-0.110203	-0.0684293	-0.513798	-0.627372	-0.403629
C1_03780C	HMG1	-0.321536	-0.47125	-0.714544	-0.463747	-0.0546018	-0.241755	-0.325431	-0.500032	-0.248908
C1_03790C	CAALFM_C103790CA	-0.75031	0.0673129	-1.57321	0.0268093	-0.899783	0.244138	-0.705388	0.0135752	0.202676
C1_03800W	RPP1	-0.221912	0.538287	-0.957854	0.472472	-0.651433	0.361925	-0.189696	0.19599	0.0373481
C1_03810C	ELA1	-0.35389	-0.205116	-0.207357	-0.219281	-0.247877	-0.18325	-0.110196	-0.0923384	-0.376066
C1_03820W	PDR16	0.66335	-1.60893	0.0842385	-1.54795	-0.577078	-1.7464	-0.0513189	-1.14977	-1.37631
C1_03830C	CAALFM_C103830CA	-0.436132	0.332443	-1.054	0.126188	-0.584683	0.20112	-0.469503	0.0485532	0.0542161
C1_03840W	CAALFM_C103840WA	-0.895641	-0.278513	-1.04579	-0.470313	-0.639652	-0.450033	-0.736882	-0.738548	-0.284624
C1_03860C	BNI4	0.418527	0.45638	0.319866	0.113498	0.222241	0.21571	0.314855	0.136143	0.166619
C1_03870C	CAALFM_C103870CA	0.871379	-1.11121	-1.30572	0.385231	-2.14455	-1.10262	-0.249344	-0.911249	0.830954
C1_03890W	CAALFM_C103890WA	0.44981	0.361195	-2.73902	0.0267693	-1.22182	-0.502996	-0.458767	-0.934799	-0.535439
C1_03900W	SEN15	-0.608871	-0.19427	-1.13805	-0.0605361	-0.695877	-0.0413548	-0.526012	-0.132253	-0.02176
C1_03910C	CAALFM_C103910CA	0.219538	0.526228	0.00608818	0.191725	0.147355	0.267356	0.157737	0.253237	0.18293
C1_03920C	CAALFM_C103920CA	0.319537	0.226582	0.497908	0.236355	0.403916	0.354714	0.313762	0.417472	0.221015
C1_03930W	CAALFM_C103930WA	-0.363292	-0.568531	-1.02699	-0.376727	-0.471435	-0.183183	-0.255894	-0.0628779	-0.0312635
C1_03940W	CAALFM_C103940WA	-0.791189	-1.75066	-1.66164	-0.898422	-1.12768	-0.895742	-0.697275	-0.871636	-0.533094
C1_03950C	CAALFM_C103950CA	-0.179626	-0.548885	-0.315726	-0.636886	-0.141864	-0.573979	-0.0543227	-0.265353	-0.412823
C1_03960C	CAALFM_C103960CA	0.238365	-0.108031	0.264659	-0.522594	0.115012	-0.262219	-0.0899574	0.0419257	-0.233432
C1_03980W	SPC19	0.0719234	0.0568374	0.108852	-0.112703	0.0135534	0.0789081	0.13999	0.158998	0.022498
C1_03990W	CAALFM_C103990WA	-0.162884	-0.447722	-0.805686	-0.825097	-0.64302	-0.676582	-0.403391	-0.667027	-0.467945
C1_04000C	KTR4	-0.412303	0.0305551	-0.617528	0.00523202	-0.428392	0.0316062	-0.343019	-0.271717	0.156534
C1_04010C	CAALFM_C104010CA	0.743573	-1.1689	0.865719	-1.28031	-0.0284924	-1.10281	0.282078	-1.62802	-2.53037
C1_04020C	CSH1	2.81429	2.28342	3.60207	2.00521	2.65211	1.67216	2.85606	2.64979	-0.897892
C1_04030W	CAALFM_C104030WA	-0.5968	-0.617208	-0.913217	-0.228943	-0.473848	-0.252819	-0.345346	-0.14234	-0.0854711
C1_04040C	CAALFM_C104040CA	-0.69547	0.315635	-1.39511	0.279178	-0.870948	0.291052	-0.546676	0.247748	0.204221
C1_04060W	IFI3	1.14644	0.598812	1.72344	0.636672	0.54539	0.473256	1.26101	0.838981	-0.00977038
C1_04070C	BET4	-0.000694188	-0.63408	-0.00848081	-0.565807	0.159332	-0.490333	-0.112937	-0.559684	-0.377965
C1_04080W	MAD2	-0.0544574	-0.374348	0.0593503	-0.671762	0.115727	-0.577882	-0.0834913	-0.509392	-0.616704
C1_04090C	CAALFM_C104090CA	-0.415786	-0.0933084	-0.534878	-0.113843	-0.377277	-0.148221	-0.288967	-0.0185141	-0.0352697
C1_04100C	POR1	-0.280599	-0.186701	-0.116668	0.391114	-0.311388	0.0842736	-0.0270747	0.160772	0.153666
C1_04110W	CAALFM_C104110WA	-0.499566	-0.814034	-0.874228	-0.96986	-0.476923	-0.808077	-0.522926	-0.942507	-0.848736
C1_04120C	CAALFM_C104120CA	-0.0131281	-0.130755	-0.58162	-0.223918	-0.394587	-0.297496	-0.0327792	-0.148503	-0.539458
C1_04130W	ERB1	-0.470132	0.293974	-1.40105	0.267935	-0.743861	0.393662	-0.364801	0.248284	0.30449
C1_04140W	IFD6	0.989265	-2.78344	-1.99173	-2.10756	-1.43398	-2.10524	0.786016	-2.48813	-2.33535
C1_04150C	CAALFM_C104150CA	0.31326	-0.0111084	0.438081	-0.404209	0.706007	-0.321009	0.154372	-0.727308	-1.11716
C1_04160C	CAALFM_C104160CA	0.379211	-0.092402	0.409142	0.337176	0.503342	0.223551	0.403978	0.396208	-0.268701
C1_04170C	HTA2	-0.317349	-0.26031	-0.127803	-0.143851	-0.193395	-0.352539	-0.0585332	0.0511662	0.0909763
C1_04180W	CAALFM_C104180WA	-0.260206	-0.586076	-0.171948	-0.240852	-0.100337	-0.348344	-0.0363309	-0.0913819	-0.134809
C1_04190C	CAALFM_C104190CA	0.0411211	-0.221554	0.212657	-0.0500969	-0.00169022	-0.287359	0.0558585	-0.17846	-0.358569
C1_04200C	CAALFM_C104200CA	0.00352356	-0.320633	-0.102695	-0.091989	0.123667	-0.0730331	0.0875695	-0.128828	-0.33442
C1_04210C	CDC3	0.752397	0.173736	0.960376	0.362616	0.770165	0.148063	0.734623	0.00179535	-0.200545
C1_04220C	CAALFM_C104220CA	0.0665427	-0.271909	-0.0926761	-0.680491	0.0211117	-0.623488	-0.0303067	-0.706046	-0.587
C1_04230W	CAALFM_C104230WA	-0.0784807	-0.113148	-0.0131826	-0.0937698	-0.123423	-0.153484	0.0811392	-0.0513956	-0.132069
C1_04240C	HHF1	-0.16332	-0.346021	0.0471077	-0.274062	-0.0687367	-0.484504	0.0314981	-0.0102379	-0.099985
C1_04260W	HHT21	-0.290408	-0.401703	-0.286057	-0.264184	-0.196861	-0.410325	-0.098246	-0.00553225	0.106725
C1_04270C	CAALFM_C104270CA	0.881689	0.781883	1.18025	-0.910594	0.381012	-0.492953	1.07734	-0.339877	-1.18634
C1_04280C	CAALFM_C104280CA	0.283028	0.0685622	-0.102788	-0.0241107	0.166236	0.172919	0.305776	-0.0272898	-0.142492
C1_04290C	ACS2	-0.728546	-0.0957134	-0.502329	0.56339	-0.418852	0.348182	-0.598913	-0.309205	0.0869829
C1_04300C	SSA2	-1.10167	-1.97374	-1.1315	-1.13155	-0.709347	-1.01041	-0.746952	-1.54228	-0.240503
C1_04310C	GIG1	0.535281	-0.888369	0.796819	-0.886993	0.590729	-0.495633	0.423786	-1.37265	-0.824947
C1_04320W	GPM2	0.36842	-0.178106	-0.0516778	-0.341728	0.00115766	-0.138386	0.311908	-0.165285	-0.182261
C1_04330W	RPN4	0.896966	0.609359	0.452308	0.258168	-0.117338	0.197761	0.965737	0.517751	0.185137
C1_04340C	CAALFM_C104340CA	-0.461607	-0.618741	-0.697682	-0.560562	-0.165886	-0.427282	-0.330455	-0.39648	-0.282112
C1_04350C	CAALFM_C104350CA	0.319357	1.36671	1.19626	0.958841	0.288605	0.838092	0.51739	1.13262	0.205965
C1_04360C	CAALFM_C104360CA	-0.478003	-0.964778	-0.643357	-0.846558	-0.633736	-0.786141	-0.468529	-0.345036	-0.431779
C1_04370C	CAALFM_C104370CA	-0.816576	-0.792254	-1.22209	-0.439809	-0.762164	-0.481145	-0.647831	-0.326334	-0.0923515
C1_04380W	SIT4	-0.620917	-0.180565	-0.795028	-0.215509	-0.707685	-0.302721	-0.455093	0.0529192	0.276732
C1_04390C	NOP4	-0.492031	0.724881	-1.51447	0.577869	-0.925139	0.550209	-0.283629	0.556006	0.531444
C1_04400C	APE2	-1.07559	-1.4222	-1.54534	-0.990024	-1.4143	-0.846685	-0.826141	-0.606395	0.114029
C1_04410C	ESS1	-0.428936	0.00789777	-0.285032	-0.250434	-0.406515	-0.288469	-0.341233	-0.18192	-0.102847
C1_04420C	URA6	-0.495954	-0.969324	-0.674301	-0.870503	-0.366049	-0.817345	-0.558696	-0.956337	-0.689273
C1_04430C	CAALFM_C104430CA	0.769239	0.569673	0.916186	0.59445	0.724881	0.479006	0.87213	0.574663	-0.0637131
C1_04440W	CAALFM_C104440WA	0.691744	0.410634	0.62144	0.560532	0.593395	0.313586	0.634561	0.502515	0.111244
C1_04450C	FMA1	-1.15387	-3.50235	-3.33926	-2.56243	-4.23738	-4.29155	-1.16792	-1.17767	-0.0299565
C1_04460C	CAALFM_C104460CA	1.75291	-0.174887	1.5386	-0.52049	-0.439677	-0.944083	2.26088	2.3579	-0.58423
C1_04470C	CAALFM_C104470CA	0.58116	1.30185	1.29483	1.48656	0.445253	1.3958	0.565249	-0.383399	1.486
C1_04480C	TUS1	1.18393	0.562247	1.43909	0.366612	0.973017	0.385097	1.0637	0.252433	-0.0142287
C1_04490W	CAALFM_C104490WA	-0.163986	-0.145076	-0.147952	0.00712538	-0.165017	-0.0120994	-0.125592	-0.125516	0.0742501
C1_04500W	ICL1	1.981	-0.850429	5.5285	-0.207229	-0.948546	-1.38972	1.87803	0.333058	-0.510473
C1_04510W	CAALFM_C104510WA	-0.299885	0.394793	-0.9033	0.299434	-0.479794	0.338675	-0.238066	0.137051	0.192223
C1_04520C	PHO85	0.0134172	0.021734	0.113733	0.19966	0.203385	0.0975693	0.124473	0.0751828	-0.0484813
C1_04530C	CAALFM_C104530CA	-0.0550265	0.285671	-0.129729	0.327305	0.114405	0.268629	0.0310553	0.183785	0.118861
C1_04540C	VPS16	0.165421	0.101696	0.283975	0.0212824	0.138378	0.220662	0.267963	0.257677	0.202869
C1_04550W	ELC1	-0.413734	-0.715393	-0.303144	-0.57259	-0.224942	-0.375703	-0.297184	-0.762571	-0.404968
C1_04560W	CAALFM_C104560WA	0.329813	0.182884	0.972512	0.0314804	0.600286	0.252222	0.471735	0.441494	0.0902203
C1_04570C	CHL4	0.208341	-0.118588	0.537117	-0.105443	0.397627	-0.0490173	0.342412	0.390724	0.148813
C1_04580C	CAALFM_C104580CA	0.190472	0.232027	0.696688	0.35694	0.249662	0.11034	0.119632	-0.205108	-0.0230101
C1_04590W	CAALFM_C104590WA	1.97902	0.276305	2.0238	-0.0605069	0.567689	-0.356306	0.978731	0.642291	-0.597258
C1_04600C	CAALFM_C104600CA	-1.10225	-1.11353	-1.64225	-0.973087	-0.877696	-0.80953	-0.932767	-0.890028	-0.377368
C1_04610W	ATP1	-0.866723	-0.771333	-1.10293	-0.781384	-0.688857	-0.708422	-0.619929	-0.543602	-0.230651
C1_04620W	CAALFM_C104620WA	0.632064	0.657079	0.814341	0.183553	0.744328	0.535783	0.449465	0.0190003	-0.00770372
C1_04630C	CAALFM_C104630CA	0.341192	0.433089	0.296088	0.239268	0.345737	0.343224	0.404197	0.247619	0.169005
C1_04640W	CAALFM_C104640WA	-0.0838154	0.524881	0.0744248	-0.0083361	0.0214178	0.236054	0.166342	0.0593472	0.306604
C1_04650W	DUR3	-0.193068	7.87193	0.382018	0.184709	-0.142135	0.0777924	-0.166543	0.276315	-0.325851
C1_04660W	DUR1%2C2	-0.125941	5.90019	0.36568	0.135354	-0.133153	0.150471	0.0709588	0.180141	0.0457485
C1_04670W	HAT1	-0.241939	-0.625931	-0.159211	-0.33482	-0.0935411	-0.106002	-0.00989272	-0.0929561	-0.16099
C1_04680W	PIL1	0.483616	0.76421	0.969392	0.274597	0.246397	0.640609	0.757307	0.69178	0.0218367
C1_04690C	CAALFM_C104690CA	2.72678	2.18632	1.79661	0.589637	0.285061	-1.08667	2.01168	0.504174	0.413017
C1_04700C	CAALFM_C104700CA	1.78998	1.56046	2.00697	0.899166	0.996953	0.9124	1.81647	1.45474	0.354268
C1_04710C	CAALFM_C104710CA	-0.664225	0.408189	-1.29819	0.323167	-0.693267	0.424671	-0.430223	0.146271	0.177702
C1_04720W	CAALFM_C104720WA	-0.0677595	-0.119315	0.38869	0.112581	0.109388	-0.332778	0.112921	-0.491429	-0.743413
C1_04730C	LYS21	-0.459838	-0.256468	-0.4309	0.252716	-0.521116	0.0320397	-0.330264	-0.0536947	-0.0215774
C1_04740W	LPG20	0.649821	0.496031	1.25439	0.808965	0.152922	0.198916	0.919261	0.883574	-0.0126373
C1_04750W	IFE1	-0.157166	0.394219	0.181196	0.724374	-1.12574	-0.815387	0.808307	1.61443	0.959529
C1_04760C	SYG1	0.224869	0.763113	0.708531	0.473077	0.690286	0.234142	0.157494	0.0309942	-0.108131
C1_04770C	ERG3	0.301107	-0.153019	-0.402587	-0.275704	0.00387654	-0.619042	-0.13931	-0.481186	-0.413173
C1_04780C	CAALFM_C104780CA	0.103288	0.00373082	0.0684486	0.202535	0.174449	0.164168	0.116348	0.126388	0.114714
C1_04790W	CAALFM_C104790WA	-0.238595	-0.0533499	-0.51934	-0.119645	-0.36403	-0.267207	-0.249255	-0.18164	-0.084138
C1_04800C	CAALFM_C104800CA	2.24807	1.43624	1.8496	2.00314	1.32869	1.71457	2.28059	2.59531	0.442479
C1_04810W	TCO89	0.0569327	-0.174201	0.171597	-0.237056	0.117087	-0.117882	0.0262034	-0.174009	-0.0410808
C1_04820C	CAALFM_C104820CA	-0.964344	-0.846084	-0.902919	-0.555862	-0.591942	-0.685749	-0.730729	-0.814997	-0.274188
C1_04830W	SEC21	-0.187806	-0.323641	-0.257118	-0.0450535	0.0306217	-0.0414383	-0.0537271	-0.152543	-0.158081
C1_04840C	CAALFM_C104840CA	-0.0501754	-0.00231	0.141265	-0.293345	0.0634979	-0.234148	-0.132047	-0.563989	-0.248079
C1_04850C	CAALFM_C104850CA	0.0957105	0.612856	0.0663588	0.33495	-0.0403644	0.508482	0.171727	0.156051	0.178736
C1_04860W	CAALFM_C104860WA	0.107118	-0.300602	0.299718	-0.233316	0.252576	-0.0577252	0.221507	0.00271375	-0.142868
C1_04870W	SAP7	-1.64435	-1.14254	-0.963509	0.334343	-1.42731	0.357949	-1.49713	-0.927358	-0.377572
C1_04880C	MRPL37	-0.889272	-0.849363	-1.33715	-0.410564	-0.742739	-0.480449	-0.724117	-0.590015	-0.0236071
C1_04890W	YBN5	-0.909674	-0.869007	-1.05852	-0.536568	-0.405105	-0.407394	-0.85415	-0.948607	-0.224191
C1_04900W	MNN15	0.582773	1.4226	0.727562	0.85626	0.384453	0.490321	0.419341	-0.247761	0.307876
C1_04910C	CAALFM_C104910CA	-0.327472	-0.0210786	-0.694146	0.267683	-0.468054	0.257764	-0.314793	0.00444228	0.174248
C1_04930C	CAALFM_C104930CA	1.42191	1.5772	2.19323	2.15737	1.71423	1.4286	1.86273	1.48127	0.408265
C1_04940C	CAALFM_C104940CA	2.68429	3.05273	3.26093	2.23187	1.55452	1.59701	2.88539	2.56219	0.572618
C1_04950C	RPM2	-0.269603	0.139641	-0.566964	0.143924	-0.380679	0.183176	0.00189547	0.412038	0.672051
C1_04960C	CAALFM_C104960CA	-0.0622317	-0.0899875	-0.152503	-0.0836291	-0.115491	0.0391223	-0.0764915	-0.119314	-0.16085
C1_04970W	CAALFM_C104970WA	-0.966647	-0.927684	-1.70991	-0.387555	-0.936675	-0.176907	-0.669693	-0.270961	0.190697
C1_04980C	CAALFM_C104980CA	-0.282723	-0.0350448	-0.466615	-0.211383	0.167284	0.0320265	-0.115572	-0.0334771	-0.0733537
C1_04990C	CAALFM_C104990CA	-0.0976508	0.05124	-0.203528	0.0400647	0.0905799	0.252849	-0.0325515	-0.127837	0.170503
C1_05000W	RHD1	-3.66643	-1.37223	-5.40905	-0.657589	-2.22675	-0.694816	-3.5272	-3.01339	0.750899
C1_05010C	CAALFM_C105010CA	-0.125404	0.362834	-0.470785	0.0377497	-0.35699	-0.412337	-0.360765	-0.259283	-0.867603
C1_05020C	ARG2	-0.490292	0.000573984	-0.242134	-0.0178971	-0.361655	-0.147406	-0.341116	-0.272878	0.0274445
C1_05030C	PSF2	0.175148	-0.219288	0.225421	-0.0589438	0.446225	-0.0311726	0.118038	0.10635	-0.216045
C1_05050C	RRP6	-0.47814	0.537148	-1.26177	0.481901	-0.718019	0.513273	-0.271264	0.450595	0.426626
C1_05060W	REI1	-0.676874	0.377273	-1.58144	0.254592	-1.0801	0.235907	-0.517831	0.164093	0.277126
C1_05070C	GPI7	0.158382	-0.00155743	0.122363	-0.116744	0.179361	0.0432509	0.259706	-0.0312156	-0.0128292
C1_05080W	GPT1	0.55232	2.46928	0.688677	0.67797	0.10687	0.80134	0.672099	1.03656	0.228275
C1_05090W	TRY2	-0.253264	0.437952	-0.436353	0.17223	-0.291022	0.148854	-0.223214	0.30588	0.0820205
C1_05100W	CAALFM_C105100WA	0.198824	-0.0625655	0.27914	-0.417266	0.356515	-0.333023	0.21095	-0.259309	-0.300595
C1_05110C	ARO4	-1.1309	-0.322831	-1.0692	-0.162188	-0.768976	-0.0885585	-0.964285	-0.501757	0.241397
C1_05120W	CAALFM_C105120WA	0.602061	0.888393	0.976378	0.357491	0.462743	0.107394	0.466964	0.32084	-0.172287
C1_05140W	BRG1	3.85167	4.93758	3.94523	4.35957	2.73628	3.14025	3.54623	2.743	1.72653
C1_05150C	CAALFM_C105150CA	2.14087	1.97237	0.991464	0.820361	-1.38779	0.0340612	2.03749	0.811689	-0.362528
C1_05160C	CAALFM_C105160CA	3.12505	1.24707	3.06271	1.25754	1.09694	0.55332	2.76853	1.38833	0.110725
C1_05170C	CUE5	0.240526	-0.0131569	0.393749	-0.188796	0.0691725	-0.234706	0.263805	-0.169662	-0.185764
C1_05180C	CAALFM_C105180CA	-0.691704	-1.18181	-0.973551	-0.448502	-0.790618	-0.447492	-0.501731	-0.301117	-0.0389703
C1_05190C	CAALFM_C105190CA	-0.88902	-1.41173	-1.25398	-0.910354	-0.906321	-0.788666	-0.775317	-0.777389	-0.463804
C1_05200C	CAALFM_C105200CA	0.423755	0.157273	0.403918	-0.40161	0.324363	-0.54731	0.378727	0.145709	-0.415973
C1_05210C	CAALFM_C105210CA	-1.00844	-1.06693	-1.50511	-0.523712	-0.882812	-0.607051	-0.755766	-0.520946	-0.306475
C1_05220C	CAALFM_C105220CA	-0.0549652	0.605781	-0.767383	0.507038	-0.261459	0.656576	-0.117427	0.474296	0.34801
C1_05230W	CAALFM_C105230WA	-0.880798	-1.03709	-1.70708	-1.07311	-0.847481	-0.932602	-1.17567	-1.04968	-0.745708
C1_05240C	RPT1	-0.250189	-0.122633	-0.259429	-0.203869	-0.131377	-0.118415	-0.182067	-0.250842	-0.0987276
C1_05250W	CAALFM_C105250WA	-0.293975	-0.423148	-0.261378	-0.373144	-0.0439459	-0.292627	-0.141782	-0.391441	-0.25492
C1_05260C	SDH1	-0.341066	-0.235212	-0.577601	-0.125387	-0.170015	-0.22233	-0.228846	-0.258664	-0.183095
C1_05270C	CAALFM_C105270CA	-0.827059	-0.759728	-0.946817	-0.360065	-0.507357	-0.559405	-0.516491	-0.33828	-0.0901367
C1_05280W	CAALFM_C105280WA	0.106149	0.106448	0.191363	0.104912	0.236968	-0.0176191	0.0947535	0.155394	-0.0036695
C1_05290W	GRS1	-0.762461	-0.382335	-0.682999	0.0543897	-0.685968	-0.23904	-0.662483	-0.574128	-0.046929
C1_05300C	PRD1	1.421	1.18457	1.61477	1.11982	1.38712	1.22014	1.41826	1.19157	0.214251
C1_05320C	CAALFM_C105320CA	0.470175	-0.119753	0.85559	0.0799644	0.551432	0.148421	0.457337	0.0565565	-0.00705802
C1_05330C	CAALFM_C105330CA	-0.367263	-0.560283	-0.283772	-0.491406	0.0424988	-0.242188	-0.259919	-0.516664	-0.437914
C1_05340C	ZCF2	0.0391886	0.70421	-0.349515	0.0525571	-0.2074	0.127757	0.185019	0.292398	0.401231
C1_05350W	YPT53	0.328867	0.20081	0.524379	-0.118586	0.166674	-0.0652044	0.36046	0.279778	0.0118145
C1_05360C	CAALFM_C105360CA	-0.400174	0.314298	-0.657877	0.344402	-0.264648	0.422769	-0.259652	0.371358	0.300404
C1_05370C	CAALFM_C105370CA	1.08024	0.391395	1.30774	0.174749	0.920063	0.24842	1.13739	0.235253	-0.096176
C1_05380C	CAALFM_C105380CA	-0.0401346	0.0564362	0.0450969	0.167202	-0.0337644	0.147903	0.0241155	0.235662	0.183959
C1_05390C	CAALFM_C105390CA	-0.329028	-0.294121	-0.258371	-0.196451	-0.153262	-0.253053	-0.238817	-0.058986	-0.110635
C1_05400C	CAALFM_C105400CA	0.0793231	-0.697768	-0.0236074	-0.224195	-0.0116356	-0.308838	0.169405	-0.145816	-0.286879
C1_05410C	TRP99	-0.0750554	-0.376209	-0.442812	-0.440051	-0.316353	-0.24517	0.224973	0.160435	-0.0355412
C1_05420W	CAALFM_C105420WA	-0.533682	-0.585413	-0.609258	-0.611138	-0.377293	-0.665245	-0.408434	-0.482224	-0.341483
C1_05430W	SPT20	-0.0456301	-0.277937	-0.235545	-0.45727	-0.155538	-0.25715	-0.174449	-0.27054	-0.197919
C1_05440C	CAALFM_C105440CA	2.23793	2.25664	3.3096	0.897185	1.60606	0.765646	1.41415	0.23516	-0.0236028
C1_05450W	CAALFM_C105450WA	2.17737	2.25873	3.24552	1.17133	1.61967	1.09628	1.53753	0.181744	-0.234824
C1_05460W	KOG1	0.1565	-0.105913	0.377564	-0.104749	0.176832	-0.175088	0.236993	0.0528304	-0.169805
C1_05470W	MTM1	-0.384949	-0.415094	-0.613459	-0.439832	-0.237532	-0.388233	-0.395299	-0.180574	-0.0813481
C1_05480C	CAALFM_C105480CA	-0.650884	-0.187603	-0.6078	-0.314872	-0.480603	0.111933	-0.213237	0.137693	-0.0313813
C1_05490C	CAALFM_C105490CA	-0.433411	-0.719203	-0.354765	-0.465598	-0.237021	-0.533119	-0.239113	-0.201642	-0.0383869
C1_05500W	RSM22	-0.729116	0.0596849	-1.57278	0.145901	-1.04729	0.127202	-0.517911	0.127251	0.210364
C1_05510C	RPS27A	0.11058	-0.0471768	0.37335	-0.178752	0.0760868	-0.242697	0.34284	-0.406037	-0.360471
C1_05520W	CAALFM_C105520WA	1.63838	1.93484	0.87751	1.15747	0.972735	0.903268	1.22554	1.24096	0.31065
C1_05530C	SSH1	-0.512916	-0.678195	-0.890636	-0.415744	-0.29775	-0.259109	-0.50707	-0.533798	-0.11644
C1_05540C	CAALFM_C105540CA	0.560643	0.821582	0.823189	-0.0297666	1.01134	0.207074	0.456609	0.219336	-0.16809
C1_05560W	RIB4	-0.0862425	-0.0194384	0.0623711	0.0120172	0.535145	0.00750118	0.053656	-0.0814125	-0.24041
C1_05600W	GSL1	0.23294	0.345032	0.489978	0.0797827	0.435261	0.370285	0.298783	-0.00301389	0.0960634
C1_05610W	CAALFM_C105610WA	-0.166021	0.155282	-0.211844	0.340337	-0.0680664	0.238444	-0.0407842	0.226822	0.228718
C1_05620C	STE3	-0.592301	-0.118747	-0.126517	-0.576599	-0.334775	-0.581405	-0.371671	-0.750921	-0.483664
C1_05630C	CAALFM_C105630CA	-0.560407	0.0044204	-1.15562	-0.0717258	-0.569765	0.0587926	-0.524047	-0.282554	0.148491
C1_05640C	FAL1	-0.52382	0.346834	-1.10309	0.31898	-0.653932	0.329299	-0.393214	0.355747	0.269874
C1_05650W	CAALFM_C105650WA	-0.219697	0.334021	-0.564438	0.406943	-0.179378	0.49387	-0.124143	0.353474	0.233398
C1_05660C	CAALFM_C105660CA	-0.520394	-0.378637	-0.703375	-0.0687688	-0.343172	-0.0124515	-0.324653	0.0172265	0.0365035
C1_05670W	CAALFM_C105670WA	-0.118059	0.0206878	0.0215918	-0.441672	-0.0213585	-0.275474	-0.0647395	-0.255292	-0.307565
C1_05680C	RIM1	-0.2747	-0.635777	-0.562249	-0.673877	-0.277924	-0.554695	-0.298838	-0.532771	-0.344302
C1_05690C	CAALFM_C105690CA	1.3874	1.40275	2.30062	1.68729	0.260005	0.528816	-0.419688	0.452879	0.286031
C1_05700W	AUT7	0.929429	1.15959	2.23664	0.324243	1.17481	0.62058	0.733523	0.36255	-0.172263
C1_05710C	UGA4	-0.798222	1.2069	-0.665872	0.811879	-0.146049	0.735438	-0.679484	-0.181849	0.100705
C1_05720W	CAALFM_C105720WA	-0.901773	-0.626184	-1.20967	-0.291176	-0.601558	-0.258949	-0.745131	-0.42512	0.125647
C1_05740C	CAALFM_C105740CA	0.779769	-0.253442	0.968989	-0.262312	0.351678	-0.346832	0.786448	0.283208	-0.0839757
C1_05750C	CAALFM_C105750CA	0.118963	0.157992	0.237307	0.304246	0.224124	0.299835	0.193991	0.325022	0.182511
C1_05760C	PGA26	-2.04621	-2.26705	-3.2976	-2.24112	-0.281203	-0.101974	-2.27762	-1.69413	-0.279268
C1_05770C	PRC3	0.487341	0.837224	0.68726	0.329617	0.445119	0.378587	0.675352	0.739683	0.0201426
C1_05780W	CAALFM_C105780WA	-0.0926528	0.0249797	-0.185425	0.0134439	-0.158171	0.0468911	0.0855414	0.23705	0.239293
C1_05790W	CAALFM_C105790WA	-0.871102	-1.49701	-1.29495	-1.22977	-0.852617	-1.23306	-0.886865	-1.34611	-0.651517
C1_05800C	CAALFM_C105800CA	-0.0709578	-0.290994	0.0395787	-0.237635	0.165294	-0.277105	-0.0598588	-0.134369	-0.160888
C1_05810W	GIM5	-0.200469	-0.164633	-0.239246	-0.195026	-0.181463	-0.169405	-0.100267	-0.309984	-0.101815
C1_05820C	RAD10	0.0321121	-0.220937	0.137345	-0.382908	0.124624	-0.000215159	0.0953297	-0.058415	-0.0620992
C1_05830W	CAALFM_C105830WA	1.7897	0.862954	1.99475	-0.00407515	-0.898361	-1.43646	3.35699	-0.599693	-1.22409
C1_05840W	PRN1	0.759168	-0.439092	-1.10238	-0.128729	-0.964636	-0.333242	-0.263489	-0.432687	-0.205418
C1_05850W	POL32	-0.225807	-0.40494	-0.33921	-0.233633	-0.417258	-0.333438	-0.236166	-0.147646	-0.0949608
C1_05860W	PRN2	0.912219	0.506583	0.825961	0.373114	0.451742	0.479844	0.644247	0.154444	-0.192508
C1_05870W	PRN3	1.03161	0.512027	-0.0247577	0.500889	0.286203	0.4756	0.228365	-0.0288761	-0.31137
C1_05880W	PRN4	0.640177	0.0401311	0.216015	0.188365	0.224668	0.322885	0.246303	-0.432684	-0.220872
C1_05890W	CAALFM_C105890WA	2.32084	0.696803	7.25053	0.953514	1.17502	0.977773	2.84271	3.47387	0.706845
C1_05900W	CAALFM_C105900WA	0.353494	0.380779	0.814619	0.0682134	0.732246	0.129042	0.116108	-0.584948	-0.114232
C1_05910W	SIP5	0.678605	0.84005	1.58163	0.322645	0.971566	0.211271	0.996927	0.446346	0.0484155
C1_05920W	CAALFM_C105920WA	3.53688	2.82287	3.80762	1.26204	3.81936	2.83924	2.89752	-0.405876	0.115047
C1_05930C	CAALFM_C105930CA	0.130862	0.853859	-0.0587265	0.352658	-0.147193	0.420636	0.580057	1.00439	0.268205
C1_05940W	PHO87	-1.99569	-1.91044	-3.45199	-0.692733	-1.94737	-0.61365	-2.06807	-1.72934	0.111481
C1_05950C	CAALFM_C105950CA	0.100874	0.101	0.452514	0.431193	-0.278293	0.199667	-0.596682	-0.423682	-0.385792
C1_05960W	PGA45	-0.551777	-1.0093	-0.476158	0.26582	-1.94756	-0.205421	-2.78881	-1.89066	-0.18594
C1_05970W	CAALFM_C105970WA	2.91173	2.18314	2.30757	2.42209	1.90844	1.65109	2.73655	2.41105	0.556542
C1_05980W	CAALFM_C105980WA	0.7188	0.635429	0.879247	0.332804	0.576413	0.454825	0.621488	0.335509	0.0595468
C1_05990C	CAALFM_C105990CA	-0.943378	-0.406595	-0.350542	-0.188006	-0.217715	0.114246	-0.453453	-0.560203	-0.288296
C1_06000W	CAALFM_C106000WA	0.154447	1.06711	-1.09619	0.684522	-1.24972	0.413491	-0.217957	-1.01421	0.398328
C1_06010W	CHS7	0.234167	0.277507	0.22881	0.316332	0.310096	0.102411	0.233935	0.0939309	-0.157781
C1_06020W	RGD1	0.346944	0.183023	0.29439	0.119803	0.321766	-0.021807	0.434613	0.169342	-0.0529787
C1_06030C	CAALFM_C106030CA	0.118327	-0.37668	0.151418	-0.397367	-0.049495	-0.240957	0.0349513	-0.278684	-0.270328
C1_06040W	RTT101	0.199846	0.0361033	0.0187495	-0.0571147	0.0797081	0.0989015	0.178523	0.198299	0.123783
C1_06050C	CAALFM_C106050CA	-0.322174	-0.610326	-0.534695	-0.186889	-0.565955	-0.308313	-0.0342303	0.0211031	0.22132
C1_06060C	ACP1	-0.617927	-0.873131	-0.854783	-0.594762	-0.599508	-0.43263	-0.473604	-0.383049	-0.195941
C1_06070W	CAALFM_C106070WA	-0.927606	-1.69918	-1.54677	-1.31222	-0.741039	-1.23122	-1.01676	-1.23333	-0.792476
C1_06080C	ARC35	-0.179944	-0.635918	-0.281321	-0.640566	-0.1399	-0.434356	-0.128208	-0.314417	-0.30394
C1_06090C	CAALFM_C106090CA	-0.178413	0.266265	-0.194898	0.254885	-0.173882	0.276919	-0.0626449	0.216678	0.227416
C1_06100C	MSI3	-0.541195	-0.426524	-0.620473	0.0404195	-0.5908	-0.100836	-0.433289	-0.391453	0.114629
C1_06110C	NPL4	-0.298624	-0.371909	-0.622219	-0.329401	-0.301491	-0.0847455	-0.162307	-0.027043	0.0545694
C1_06120C	CAALFM_C106120CA	-0.303823	-1.70196	-0.401374	-1.54975	-0.20005	-1.18685	-0.467032	-1.10821	-0.760475
C1_06130C	HAC1	1.94057	2.61558	2.24412	2.38583	1.60808	2.04307	2.03393	2.15255	1.14671
C1_06150W	CAALFM_C106150WA	3.52655	1.75748	0.824536	1.64333	1.10333	1.68201	3.58096	2.67246	1.30731
C1_06160W	CAALFM_C106160WA	2.86927	1.69419	1.75456	1.38756	1.08749	0.808138	3.06059	2.95396	-0.531593
C1_06180W	TLO34	0.887833	0.439677	1.28306	0.423949	0.954806	0.366901	0.98964	0.0674605	-0.359503
C1_06190C	CAALFM_C106190CA	1.01717	0.393696	1.56462	0.691119	1.23693	0.343817	0.795787	-0.0353927	-0.251973
C1_06200W	CAALFM_C106200WA	0.244726	-0.251	0.548028	-0.0214178	0.291904	-0.107046	0.335503	-0.0137433	-0.08904
C1_06210W	BUD16	-0.504128	-0.151973	-0.765528	-0.500556	-0.435971	-0.339334	-0.613372	-0.233103	0.0654354
C1_06220C	CAALFM_C106220CA	-0.157615	0.20822	-0.365441	-0.663067	0.00815912	-0.335841	0.271175	-0.888318	-1.01768
C1_06230C	MDM34	0.251882	0.365832	0.16095	-0.0958145	-0.148847	-0.161897	0.217878	0.0690795	0.112235
C1_06250W	CAALFM_C106250WA	0.424413	-0.134367	0.55591	-0.432077	0.341109	-0.139344	0.274911	-0.251287	-0.256828
C1_06260W	PGA50	-0.71237	-0.0480228	0.0893956	1.21398	-0.484755	0.491859	-1.03846	0.877589	-0.872764
C1_06270W	CAALFM_C106270WA	0.870425	0.516624	0.763489	0.207511	0.6416	-0.0162938	0.686861	0.263733	-0.0207072
C1_06280C	UME6	4.24639	3.39017	4.4996	3.61584	4.51873	3.20388	3.89258	0.54141	-0.401363
C1_06320W	CAALFM_C106320WA	-0.0597791	0.75551	-0.302923	-0.0806867	-0.254505	-0.188951	-0.0297971	0.311055	0.402767
C1_06340W	CAALFM_C106340WA	2.17115	4.11498	3.13651	2.17702	5.10871	4.98353	1.82012	1.91084	-0.527581
C1_06350W	CAALFM_C106350WA	-0.302139	-0.920946	-0.406692	-0.300097	-0.298474	-0.0638788	0.146866	0.190152	0.114592
C1_06360W	CAALFM_C106360WA	0.177252	0.250136	0.171231	0.154067	-0.101387	0.369609	0.0471096	0.746113	0.44862
C1_06370C	PBR1	3.33432	2.76116	2.09492	1.03376	2.84275	3.00985	4.02144	0.520505	0.52656
C1_06380C	CAALFM_C106380CA	-0.0468415	0.702437	0.00134296	0.493469	-0.181925	0.413642	-0.0766592	0.344808	0.281494
C1_06390W	CAALFM_C106390WA	-0.228258	-0.561513	-0.448126	-0.832331	-0.202683	-0.601677	-0.0553917	-0.456768	-0.457514
C1_06400C	CAALFM_C106400CA	-0.17324	-0.209722	-0.402714	-0.248858	-0.0467742	-0.170388	-0.304417	-0.163537	-0.208871
C1_06410W	CAALFM_C106410WA	0.260024	0.220325	0.659557	0.237891	0.163607	0.263351	0.349466	0.586008	0.386504
C1_06420C	CAALFM_C106420CA	0.353783	0.212354	0.370162	0.00557007	0.310433	0.103996	0.290933	0.190923	0.121664
C1_06430C	CAALFM_C106430CA	1.81387	0.380053	0.883788	0.0206564	-1.84082	-1.15613	2.25891	-1.04953	-1.33247
C1_06440C	CAALFM_C106440CA	-0.569394	-0.298717	-1.29162	-0.27573	-0.723618	-0.199243	-0.508652	-0.195132	-0.225613
C1_06450C	RPS14B	-0.88751	-0.684752	-1.2926	-0.365022	-0.686748	-0.319588	-0.687518	-0.453619	0.0472138
C1_06460C	RPS22A	-0.759004	-0.588711	-1.11611	-0.323225	-0.475868	-0.210496	-0.73846	-0.565622	0.0481366
C1_06470W	CAALFM_C106470WA	-1.10697	-1.18908	-1.70981	-1.13379	-0.822161	-0.947566	-1.16796	-1.33173	-0.478842
C1_06480C	CAALFM_C106480CA	-0.128204	-0.520577	-0.0289124	-0.156925	0.0427278	-0.295679	-0.0201795	-0.321768	-0.236781
C1_06500W	CAALFM_C106500WA	-0.274754	-0.482102	-0.0331656	-0.142982	0.117946	-0.27834	-0.235676	-0.365311	-0.361904
C1_06510C	CAALFM_C106510CA	-0.103088	-0.0046064	-0.100928	-0.203606	-0.339695	-0.418977	-0.0227823	0.062631	-0.410775
C1_06520C	BPH1	0.980883	0.19049	1.13663	0.320293	0.741804	0.38682	0.988228	0.568913	0.164
C1_06530C	CAALFM_C106530CA	-0.0559523	0.0772203	-0.225159	0.104642	-0.0892761	0.138711	-0.0196212	0.355876	0.164867
C1_06540C	CAALFM_C106540CA	-0.510682	0.228671	-1.14626	0.175801	-0.659871	0.169522	-0.468518	0.12663	0.0856741
C1_06550W	GLT1	-0.0475454	1.42164	-0.0497674	0.570111	-0.0493293	0.681442	0.142144	0.440274	0.159109
C1_06560W	CAALFM_C106560WA	-0.209311	-0.162443	-0.239999	0.265874	-0.23171	0.153089	-0.015416	0.693092	0.460018
C1_06570W	ANT1	1.34496	-0.359473	0.938008	-0.288279	-0.17531	-0.403233	1.86414	3.15609	-0.854818
C1_06580W	RPS23A	-0.987343	-0.932328	-1.24114	-0.62557	-0.559517	-0.554926	-0.835384	-0.708347	-0.109256
C1_06590C	CAALFM_C106590CA	-0.453118	-0.188565	-0.529648	-0.176644	-0.32522	-0.102411	-0.248445	-0.0267345	0.0198645
C1_06600W	CAALFM_C106600WA	0.11563	0.00594828	0.24964	0.348447	0.154222	0.273385	0.230937	0.161875	-0.0100312
C1_06610C	HAK1	-0.123815	-0.170079	-1.60666	-0.613154	-2.25737	-0.708454	-0.451352	0.0227224	-1.75039
C1_06620C	CAALFM_C106620CA	-0.366972	0.669536	-0.41942	-1.08316	-0.15619	-0.640225	0.529662	-0.20456	-0.387556
C1_06630W	CAALFM_C106630WA	-0.216129	-0.312377	-0.243859	-0.197983	-0.31942	-0.314387	-0.176241	-0.0941555	-0.194927
C1_06640C	CAALFM_C106640CA	-0.420649	-0.659585	-0.528923	-0.386756	-0.220489	-0.221381	-0.490288	-0.439242	0.0215218
C1_06650W	CAALFM_C106650WA	-0.678973	-1.32075	-0.384593	-0.993903	-0.398469	-0.980571	-0.494496	-1.06193	-0.387826
C1_06660W	CAALFM_C106660WA	0.356302	2.00124	1.23595	1.67304	0.271925	1.24415	0.418266	0.786202	1.81334
C1_06670W	CAALFM_C106670WA	-0.0799982	-0.844015	0.277238	-0.721229	0.140137	0.291368	-0.119136	-0.687433	-0.124699
C1_06680W	VPS34	0.348529	0.389724	0.659505	0.20521	0.439021	0.307053	0.365668	0.287352	0.0663235
C1_06690W	CYK3	-0.32475	0.237881	-0.667968	-0.0913527	-0.418403	0.712005	-0.134294	0.303427	0.568996
C1_06700W	CAALFM_C106700WA	-0.512293	-0.802441	-0.481243	-0.790792	-0.193152	-0.195785	-0.361974	-0.632356	-0.26634
C1_06710W	CAALFM_C106710WA	-0.127909	-0.0325413	-0.227528	-0.0616249	-0.0498619	-0.140054	-0.0128382	0.10086	0.0977379
C1_06720C	CAALFM_C106720CA	-0.724406	-0.75932	-0.86648	-0.55048	-0.541437	-0.259674	-0.438433	0.0883541	0.019223
C1_06730W	RAC1	0.331168	0.38545	0.355182	-0.172017	0.22577	-0.293378	0.35084	-0.0286177	-0.134471
C1_06740C	NOP6	-0.791277	0.18552	-1.60664	-0.00382771	-1.011	0.0395178	-0.64087	-0.119791	0.090878
C1_06750W	CAALFM_C106750WA	0.174628	0.493096	0.862593	0.408273	0.492598	0.116367	0.079328	0.306233	-0.381771
C1_06760C	CAALFM_C106760CA	-0.573139	0.621835	-1.18075	0.454796	-0.641271	0.473734	-0.41844	0.3393	0.339892
C1_06770W	CAALFM_C106770WA	-0.0910542	0.472642	-0.411395	0.561132	-0.0895694	0.383281	-0.0503778	0.389108	0.0951503
C1_06780W	NPR1	0.062953	1.0762	0.235175	-0.315336	-0.139599	-0.286621	0.216976	0.178521	-0.0774231
C1_06790C	MRPL19	-1.07634	-1.34901	-1.54797	-0.878199	-0.961777	-0.859218	-0.968125	-0.889377	-0.230699
C1_06800W	CAALFM_C106800WA	-0.470066	0.266435	-1.25115	0.168149	-0.719608	0.21485	-0.410268	0.13133	0.0825064
C1_06810W	CAT1	1.92739	-1.43404	0.950465	-0.799028	-0.519692	-0.999074	1.73201	1.95573	-1.06225
C1_06820W	CAALFM_C106820WA	-0.321179	-0.346765	-0.544114	-0.369305	-0.443014	-0.506589	-0.38154	-0.33667	-0.272625
C1_06840C	CAALFM_C106840CA	-0.373099	-0.203832	-0.960674	-0.122228	-0.555816	-0.21573	-0.348716	-0.120973	-0.170498
C1_06850W	PCL7	-0.24925	-0.049088	-0.221056	-0.251775	-0.0741049	0.0415588	-0.0913778	0.00929133	0.0653299
C1_06860W	CAALFM_C106860WA	2.67421	3.7207	6.02827	3.87531	-1.743	2.55627	2.68455	2.5236	3.78829
C1_06870C	CAALFM_C106870CA	0.552707	1.45664	0.694434	-0.585199	-5.44716	-4.13513	0.28249	-0.68579	-0.325283
C1_06880C	SPO22	-0.541528	-0.881225	-1.15081	-0.453947	-1.06958	-0.726665	-0.15935	0.134125	-0.0631873
C1_06890C	CAALFM_C106890CA	-0.945131	-0.913308	-1.4573	-0.617922	-0.708331	-0.574789	-0.919024	-0.799168	-0.144257
C1_06900C	MMD1	-0.375832	-0.549372	-0.152559	-0.179177	0.163571	-0.121252	-0.322651	-0.371852	-0.346307
C1_06910C	CAALFM_C106910CA	-0.2271	0.0706399	-0.131742	0.148039	0.0262959	0.371401	-0.170698	0.128004	0.143508
C1_06920C	CAALFM_C106920CA	0.645565	-0.15123	1.20251	-0.110737	0.579012	-0.40415	0.583618	0.303135	-0.385017
C1_06930W	PGA63	0.0800397	-0.160895	-0.102532	-0.0246412	0.0669824	-0.133499	0.0431777	-0.253668	-0.241552
C1_06940C	ATC1	1.31555	0.968145	1.76861	0.823708	1.06776	0.935161	1.2234	1.01282	-0.0333845
C1_06960W	SUI2	-0.475201	-0.202116	-0.74285	-0.00498649	-0.338505	0.0137156	-0.408645	-0.0681772	0.154555
C1_06970C	CAALFM_C106970CA	0.612292	0.147434	0.829097	-0.0998609	0.0251791	-0.176716	0.396045	0.139214	-0.00118273
C1_06980C	CAALFM_C106980CA	0.676777	-0.335404	1.18367	0.628676	-0.58043	-1.10778	0.464269	0.45382	1.05645
C1_07000W	MEF2	-1.17798	-0.819816	-1.84781	-0.57551	-1.08143	-0.614376	-0.936323	-0.453391	-0.242848
C1_07010W	CAALFM_C107010WA	-0.417792	-1.22857	-0.58585	-1.612	-0.253288	-1.28282	-0.724143	-1.27128	-1.2103
C1_07020C	PUT3	-0.159541	-0.023664	-0.0606622	-0.137672	0.0173098	-0.000282568	-0.11137	-0.0643202	0.033115
C1_07030C	RBT4	1.99489	1.34986	1.8039	0.142533	0.488185	0.289225	1.41211	-1.00149	-0.18738
C1_07040C	CAALFM_C107040CA	4.24278	2.61139	4.24469	0.233659	3.92694	0.742549	3.35092	-0.625237	-0.784664
C1_07050C	CAALFM_C107050CA	0.61551	0.545035	0.790439	0.604076	0.48664	0.531833	0.588698	0.559364	0.315379
C1_07060C	CAALFM_C107060CA	-0.16041	-0.539129	-0.339528	-0.749846	-0.116046	-0.600171	-0.33628	-0.921803	-0.938629
C1_07070C	DHH1	-0.202206	-0.257283	-0.736185	-0.537807	-0.460813	-0.506976	-0.318855	-0.35635	0.0999873
C1_07080W	CAALFM_C107080WA	2.34209	0.998946	3.09137	0.606708	1.89737	0.974701	2.49644	1.71999	0.116879
C1_07090C	CAALFM_C107090CA	-0.434082	0.390543	-0.679072	0.144871	-0.40076	0.254133	-0.217294	0.227876	0.261234
C1_07100C	CAALFM_C107100CA	0.710696	0.0825393	0.938739	0.332152	0.606623	0.38931	0.641778	0.483079	0.339017
C1_07110W	TAF145	0.278536	0.0728421	0.284748	0.10513	0.0721704	0.167204	0.269024	0.168816	0.222615
C1_07120W	GAP4	0.479491	0.444531	0.0625491	0.051684	0.827252	0.135924	0.546365	0.546938	-0.379401
C1_07130C	CAALFM_C107130CA	-0.143025	0.430147	-0.393887	0.280785	-0.204617	0.31342	-0.0924387	0.236566	0.261733
C1_07140C	RIA1	-0.309718	0.233284	-0.558792	0.271018	-0.362886	0.297424	-0.193901	0.258799	0.337119
C1_07150W	CAALFM_C107150WA	-0.463741	0.570657	-0.231921	0.507545	-0.249151	0.323412	-0.174098	0.175281	0.227932
C1_07160C	CAALFM_C107160CA	6.85104	0.536759	2.07215	-0.572391	0.340262	-0.119248	5.24177	0.87384	-0.0973772
C1_07170C	ZCF23	0.510771	-0.802791	0.815378	-0.476597	0.72986	-0.455098	0.478366	-0.0668326	-0.335537
C1_07180W	CCS1	0.469566	0.188897	0.755591	0.449768	0.745512	0.447004	0.374497	0.104263	0.00184326
C1_07190W	SOG2	0.195133	-0.0870632	0.125932	-0.142784	0.319397	-0.0111031	0.108192	-0.29602	-0.144433
C1_07200W	YMC1	-1.08797	-0.334483	-1.22129	-0.167621	-0.731097	-0.32289	-0.890396	-0.672817	-0.190603
C1_07210C	CAALFM_C107210CA	-0.0730924	-0.11475	-0.00702686	-0.0825881	-0.135493	-0.0967386	-0.0439075	0.0950085	-0.0378471
C1_07220W	CAALFM_C107220WA	3.48087	1.18788	5.291	4.14796	-0.383525	1.57137	3.87638	4.67154	1.37064
C1_07230W	PHO15	-0.203675	0.471024	-0.0527129	-0.144581	0.570719	0.180613	-0.451638	-0.88646	-0.185451
C1_07240W	YPD1	-0.533206	-0.788328	-0.32272	-0.808179	-0.0312599	-0.302821	-0.374591	-0.602065	-0.148971
C1_07250C	ALG9	0.683961	0.218458	0.554599	0.0902894	0.415269	0.125206	0.5772	0.257728	-0.0362788
C1_07260C	CAALFM_C107260CA	0.19887	0.0518259	0.457396	-0.0651073	0.225043	0.0489055	0.369476	0.179279	0.0146566
C1_07270W	SEC34	-0.126866	-0.246351	0.0911217	-0.00829874	0.13992	-0.00181331	-0.0177853	0.00240082	0.0802752
C1_07280C	CAALFM_C107280CA	-0.127948	-0.359862	0.0872683	-0.161396	0.101384	-0.142007	0.00255405	-0.341889	-0.169496
C1_07330W	RME1	-2.00427	-2.16115	-2.30244	-2.27899	-2.89713	-2.41643	-1.8686	-2.55117	0.0724426
C1_07340W	CAALFM_C107340WA	-0.210047	-0.14905	-0.38874	0.00796608	-0.196886	-0.0183838	-0.189461	-0.105738	-0.0306731
C1_07350C	GPX3	0.739907	-0.419795	0.866267	-0.314255	0.424115	-0.406542	0.699793	-0.181435	-0.173866
C1_07360W	CAALFM_C107360WA	-0.0870631	-0.508627	-0.220927	-0.279746	-0.188752	-0.278342	-0.0845127	-0.202393	-0.0820234
C1_07370C	CPH1	1.10562	0.572914	1.2543	0.536482	0.909338	0.268683	0.95077	0.00459413	0.0395041
C1_07380C	KSP1	0.209077	0.341198	-0.00884565	0.306524	-0.185159	0.176219	0.0990483	0.00296365	0.329189
C1_07390W	CAALFM_C107390WA	-0.147625	-0.0737236	-0.294704	-0.155595	-0.197073	-0.00852848	-0.0214682	0.0870635	0.247932
C1_07400C	CAALFM_C107400CA	-0.479974	-0.899528	-0.431345	-0.357888	-0.0913124	-0.24589	-0.387759	-0.415082	-0.0584757
C1_07410C	SKP1	-0.062036	-0.54425	-0.46765	-0.793262	0.0467433	-0.630233	-0.281011	-0.890415	-0.805907
C1_07420C	PEX3	-0.337866	-0.190843	-0.0420311	-0.18681	-0.33013	-0.240102	0.101164	0.189919	-0.184696
C1_07430W	PHO100	-0.0414337	4.60994	0.292138	-0.123694	0.211141	3.13069	-0.145964	0.353268	0.909843
C1_07440W	CAALFM_C107440WA	0.621457	0.480798	0.844737	0.160203	0.579688	0.245997	0.568906	0.336161	0.0306897
C1_07460C	GPI8	0.18611	-0.408838	0.162022	-0.447851	0.351898	-0.474389	0.0922327	-0.348619	-0.277754
C1_07470C	CAALFM_C107470CA	-0.327053	-0.579119	-0.480826	-0.2059	-0.27766	-0.263527	-0.16949	-0.108943	0.00637974
C1_07480C	CAALFM_C107480CA	0.491469	0.187662	0.477609	0.343626	0.317839	0.250044	0.775295	0.784825	0.0531699
C1_07490C	CAALFM_C107490CA	-0.0929454	-0.519306	-0.115887	-0.435685	-0.161401	-0.489217	-0.0648762	-0.195328	-0.209218
C1_07500C	LHP1	-0.809037	-0.331643	-1.51715	-0.335629	-0.937465	-0.210186	-0.714127	-0.372031	-0.067818
C1_07510W	CAALFM_C107510WA	-0.354429	-0.366697	-0.775049	-0.286557	-0.383159	-0.205465	-0.29877	-0.203966	-0.135106
C1_07520C	IST2	0.801431	0.24757	0.917383	0.195769	0.668974	0.220002	0.63714	0.164845	-0.0793333
C1_07530W	CAALFM_C107530WA	-2.59851	NAME?	-4.35345	-3.51595	-2.00127	NAME?	-0.819735	NAME?	#N/A
C1_07540C	BBC1	0.568656	0.124148	0.639213	-0.183974	0.373304	0.0589247	0.51361	0.00783625	-0.272703
C1_07550W	SWD2	-0.134308	-0.193831	-0.201912	-0.176763	-0.128568	-0.0265414	0.111427	0.239226	-0.0389567
C1_07560W	CAALFM_C107560WA	0.0214452	0.465625	0.0219867	0.176884	-0.182348	0.130781	0.127413	0.647212	-0.00628586
C1_07570C	CAALFM_C107570CA	-0.0866054	0.385532	-0.330891	0.329189	-0.221394	0.398702	-0.0192898	0.410115	0.28897
C1_07580C	PRY1	0.645729	-1.10984	4.67469	0.226182	-0.230138	0.228962	0.912329	0.989017	0.738285
C1_07590C	CAALFM_C107590CA	0.0266959	0.137021	0.247856	0.134186	0.188585	0.184815	0.21531	0.0804578	-0.0397054
C1_07600W	ATP7	-0.921741	-1.22972	-0.987874	-1.19978	-0.542631	-1.00574	-0.724636	-1.08266	-0.767191
C1_07610C	CAALFM_C107610CA	0.0282003	-0.777457	0.25923	-0.546875	0.258949	-0.382168	0.0611929	-0.280048	-0.545446
C1_07620C	PIR32	-0.125531	-0.474862	-0.923945	-0.488841	-0.721034	-0.600614	-0.116104	-0.346303	-0.578468
C1_07630W	CAALFM_C107630WA	-0.622879	-1.11732	-1.10767	-0.572055	-0.645348	-0.371091	-0.498617	-0.38483	-0.116902
C1_07640C	CAALFM_C107640CA	0.530932	0.45918	1.22611	-0.0460451	-0.310952	0.786315	0.433668	0.49032	-0.0648305
C1_07650W	CAALFM_C107650WA	1.59347	1.73547	1.80848	1.59877	1.1066	1.40543	1.37181	1.13707	0.200821
C1_07660W	CAALFM_C107660WA	-0.584814	0.943389	-2.3734	-0.698815	-1.08966	0.809019	-0.0666425	-0.0548974	0.448439
C1_07670W	ZCF4	2.83752	6.18403	5.36329	2.68905	4.94785	1.92123	2.74114	1.77925	0.23291
C1_07680W	HAP2	-0.323442	0.223676	0.142704	-0.153302	-0.0954722	-0.246982	-0.347465	-0.40408	-0.0990321
C1_07690C	CAALFM_C107690CA	-0.20975	-0.225409	-0.464113	-0.163726	-0.174189	0.091123	-0.172112	-0.122882	0.0402914
C1_07700C	VRG4	-0.366208	-0.323911	-0.494029	-0.100918	-0.28787	-0.174237	-0.351048	-0.122238	-0.208949
C1_07710C	ADE4	-0.94045	0.335121	-1.25864	0.395278	-0.545983	0.452321	-0.657286	0.181313	0.384966
C1_07770W	FGR6-3	0.946476	0.650064	1.15737	0.4344	0.462378	0.270659	1.00039	0.823147	0.351549
C1_07780W	CAALFM_C107780WA	0.179386	-0.194025	0.312472	-0.0755824	0.206868	0.0232424	0.306796	0.0846369	0.0735655
C1_07790C	CAALFM_C107790CA	-0.905067	-0.145253	-1.7208	-0.384067	-0.96064	-0.105216	-0.800882	-0.352169	-0.0541846
C1_07800W	MTO1	-0.632572	-0.0411515	-1.21102	0.0340707	-0.723485	0.0467652	-0.43646	0.0288226	0.134553
C1_07810C	CAALFM_C107810CA	-0.0991221	0.189651	-0.324023	-0.0458656	-0.282295	0.0256614	-0.041817	0.57804	0.226462
C1_07820W	CAALFM_C107820WA	-0.536182	-0.134963	-1.02352	0.0305828	-0.598369	0.115331	-0.351448	0.154036	0.153888
C1_07830C	CAALFM_C107830CA	-0.205846	-0.548586	0.027751	-0.759485	-0.0413461	-0.494307	0.00321568	-0.374152	-0.402369
C1_07840W	CAALFM_C107840WA	-0.069694	-0.290504	-0.0430059	0.0221571	-0.161495	-0.0209678	0.0988189	0.0220713	0.0697758
C1_07850C	CAALFM_C107850CA	-0.0690225	-0.521564	-0.04447	-0.418892	-0.299523	-0.325408	-0.147345	-0.0489184	-0.154894
C1_07860W	CAALFM_C107860WA	-0.0802146	-0.480138	0.0734938	-0.808278	-0.0411886	-0.510269	-0.088857	-0.300919	-0.288452
C1_07870C	SMI1	0.200958	0.0887894	0.143558	-0.0199392	-0.0603225	0.0281466	0.26341	-0.0193366	0.0579601
C1_07880C	GCS1	0.161401	1.26549	-0.968508	0.51541	-0.664039	0.435624	0.278256	0.799456	0.0977926
C1_07890C	ADE5,7	-1.04694	0.698231	-1.36997	0.839409	-0.368193	0.869586	-0.783833	0.456834	0.50098
C1_07900W	COI1	-0.111234	1.31233	1.021	0.580428	1.57263	0.687031	0.250018	0.327241	-0.158944
C1_07910C	MRPL3	-0.997712	-0.834975	-1.71399	-0.442426	-0.984638	-0.45373	-0.785583	-0.449363	-0.00824878
C1_07920W	CAALFM_C107920WA	-0.843246	-1.32314	-1.52911	-0.94921	-1.29965	-0.814813	-0.864512	-0.772769	-0.341027
C1_07930C	ERD1	-0.588474	-0.700678	-1.18046	-0.920145	-0.210447	-0.573181	-0.549437	-0.993516	-0.705688
C1_07950C	CAALFM_C107950CA	-1.09219	-0.393927	-1.89983	-0.546778	-1.22107	-0.502814	-0.995926	-0.619958	-0.383449
C1_07960W	CAALFM_C107960WA	-0.725354	0.0841313	-1.37062	0.0905467	-0.905097	0.00262024	-0.60942	-0.165256	-0.315979
C1_07970C	IRE1	0.539774	0.527753	0.538747	0.170934	0.295474	0.106111	0.405538	0.477917	-0.00517914
C1_07980C	CAALFM_C107980CA	1.13802	-0.438261	0.585719	-0.929231	-0.570756	-0.450363	0.497075	-0.965316	-0.230904
C1_07990C	CAALFM_C107990CA	0.718631	-0.359383	0.867073	-0.358048	1.37401	1.06008	0.231682	-1.02456	-0.347818
C1_08000W	NRP1	-0.355106	-0.110686	-0.753997	-0.00575413	-0.421762	-0.00320663	-0.308274	-0.233401	0.255487
C1_08010W	DPM1	0.728593	0.218909	0.705882	0.362252	0.788697	0.271497	0.811815	0.18626	-0.23462
C1_08020W	UBA2	-0.420668	-0.440853	-0.394384	-0.284441	-0.127756	-0.0812269	-0.212044	-0.30248	0.0527537
C1_08030W	PFY1	0.610587	0.194463	0.853564	0.273517	0.778645	0.302943	0.643507	0.072492	-0.0783405
C1_08040W	CAALFM_C108040WA	0.255456	-0.229096	0.316277	-0.0560972	-0.0996114	-0.295451	0.306253	0.37987	-0.141947
C1_08050W	CAALFM_C108050WA	-0.703392	-1.25876	-1.04945	-0.572265	-0.885693	-0.565392	-0.544197	-0.238264	-0.0255569
C1_08060W	OFR1	0.171958	-0.498069	0.396833	-0.0169606	0.0187138	-0.121421	0.259478	0.0885098	-0.242454
C1_08070W	CDR4	2.01302	0.258435	0.569139	0.414768	0.475665	0.379073	1.59062	0.451582	0.338577
C1_08080C	CAALFM_C108080CA	-0.674214	-1.16247	-1.18694	-0.67964	-0.966299	-0.709222	-0.593584	-0.24267	-0.147791
C1_08090C	FUN12	-0.926992	-0.322136	-1.61479	-0.292807	-0.833482	-0.116954	-0.813652	-0.38537	0.0742213
C1_08100W	DRG1	-0.330027	-0.301206	-0.446051	0.0113686	-0.14546	-0.0499499	-0.2477	-0.10579	0.0261086
C1_08110W	CAALFM_C108110WA	-0.345435	0.0374091	-0.602868	0.0530034	-0.31763	0.0626858	-0.259153	-0.0633279	0.140421
C1_08120W	BUD6	-0.0954545	-0.185781	-0.0824655	-0.115695	-0.05769	0.0267383	-0.00901277	0.0063865	0.274319
C1_08130C	TERT	0.773382	0.277746	1.13555	0.168909	0.583095	0.0695121	0.71427	0.152477	-0.227368
C1_08140W	CAALFM_C108140WA	-0.176021	-0.708144	0.0956478	-0.452174	-0.0622299	-0.624218	-0.104212	-0.384001	-0.164623
C1_08150C	CAALFM_C108150CA	0.234625	-0.562617	0.468611	-0.208676	0.194157	-0.286564	-0.0275198	-0.103624	-0.00662762
C1_08160W	CAALFM_C108160WA	-0.251899	-0.182969	-0.438842	-0.0949222	-0.230213	-0.0113449	-0.159698	0.0750359	0.134
C1_08170C	BUL1	-0.878284	1.08019	0.59949	0.735625	-1.31568	-0.933762	-0.638396	-1.03797	0.397272
C1_08180C	CAALFM_C108180CA	0.613954	0.941401	0.638303	0.711826	0.282366	0.764003	0.601864	0.685506	0.459005
C1_08190C	CAT8	-0.43481	1.47934	0.496538	0.229231	-0.766416	-0.37242	-0.0933013	-0.101832	0.0581522
C1_08200W	NTG1	0.162488	-0.192812	0.110035	-0.0565834	-0.202289	-0.111915	0.323002	0.196662	-0.106045
C1_08210C	MLT1	-0.21185	0.617936	-0.032036	0.270124	-0.0050917	0.161991	-0.194876	-0.172225	0.351239
C1_08220W	CCR4	-0.293827	-0.205565	-0.354262	-0.277236	-0.0808804	-0.219399	-0.15875	-0.149058	-0.14712
C1_08230C	PLB5	3.11934	3.56444	3.88923	1.01872	3.11007	1.51738	2.6793	0.201281	-0.292975
C1_08240C	CAALFM_C108240CA	0.151821	0.00718265	-1.28143	0.284904	0.174535	0.622866	-0.427787	-0.15754	0.307599
C1_08260C	LTP1	-0.177844	-0.0964548	-0.267326	-0.0163377	0.0446494	0.013179	-0.130811	0.0704735	-0.0793811
C1_08270C	MED15	0.2243	0.508579	0.215872	0.163602	0.369311	0.284071	0.193154	0.127616	0.0251786
C1_08290C	DIP2	-0.642564	0.575466	-1.63669	0.407527	-0.912547	0.418939	-0.456404	0.331913	0.304197
C1_08300W	NOT5	-0.473997	-0.296644	-0.718542	-0.339076	-0.476645	-0.266501	-0.459483	-0.28736	-0.126605
C1_08310W	OPY2	0.482573	1.11418	0.783093	0.613609	0.796885	0.628934	0.376755	0.423631	0.236483
C1_08320W	TKL1	-0.665558	-0.519463	-0.527769	-0.540818	-0.25098	-0.538194	-0.778609	-1.20705	-0.61186
C1_08330C	ADH2	4.16375	3.22034	7.5497	2.25911	2.75061	2.20345	4.00485	3.62631	0.945628
C1_08340C	CAALFM_C108340CA	1.04712	0.0205135	1.62466	-0.190916	0.791092	-0.378075	0.988283	0.0623176	-0.286436
C1_08350C	CAALFM_C108350CA	7.31094	0.836988	3.76432	0.733577	0.757147	0.0824119	6.67368	5.24603	2.35299
C1_08360C	OLE1	0.117675	0.376453	-0.165501	0.512773	-0.688383	-0.0411246	-0.375324	0.0126405	-0.249495
C1_08370W	SDS24	0.688874	0.0972251	0.283465	-0.0820243	-0.0963467	0.177551	0.708307	0.543749	0.0851193
C1_08390C	CAALFM_C108390CA	-0.0410168	-0.0934921	0.139543	0.0480598	0.338094	0.0291431	0.14603	0.213793	0.0671215
C1_08400C	GCV2	0.00853414	-0.115113	0.473141	0.180779	-0.0176227	0.529198	0.170711	0.374119	-0.538503
C1_08410C	SAM4	-1.27772	-1.35292	-1.28355	-0.653426	-0.458729	-0.369424	-1.05891	-0.888434	-0.259096
C1_08420W	GCR3	-0.746601	-0.232963	-0.915143	-0.0786569	-0.614792	-0.0920271	-0.510677	-0.20206	0.0149478
C1_08430W	CAF16	0.0143352	-0.048058	-0.217708	-0.101557	-0.00761221	-0.0524539	0.0821794	0.149725	0.0174406
C1_08440C	CAALFM_C108440CA	-0.393028	-0.901692	-0.325387	-0.776352	-0.170097	-0.7922	-0.433718	-0.526242	-0.550008
C1_08450C	CDC42	0.10609	-0.290247	0.244178	-0.279963	0.284723	-0.366432	0.127408	-0.306424	-0.243926
C1_08460C	UPC2	0.0297347	-0.498808	-0.091465	-0.204123	0.167256	-0.168386	-0.348454	-0.710185	-0.250905
C1_08470W	CAALFM_C108470WA	-0.904388	-1.37793	-1.36319	-0.754999	-0.799067	-0.855632	-0.779138	-0.626435	-0.226631
C1_08480C	APS3	-0.237117	-0.411399	0.138672	-0.396807	-0.0781214	-0.593269	-0.0881367	-0.014979	-0.196067
C1_08490W	CAALFM_C108490WA	-0.446722	-0.502024	-0.156282	-0.227689	-0.116187	-0.275105	-0.157662	-0.192538	-0.10619
C1_08500C	ENO1	0.367237	0.378635	0.0989287	0.496146	0.57042	0.170644	-0.496076	-1.0675	-0.50523
C1_08510W	EAF6	0.0342688	0.565003	0.0851429	0.347039	0.171967	0.241941	0.0980465	0.431398	0.319047
C1_08520C	CAALFM_C108520CA	-0.990814	-0.935589	-1.39217	-0.64433	-0.566983	-0.580074	-0.823282	-0.595847	-0.215185
C1_08530W	CAALFM_C108530WA	1.58558	2.01988	1.94994	0.825043	1.67764	0.858042	1.64548	0.558777	-0.398133
C1_08540C	CAALFM_C108540CA	0.228625	0.0555909	0.125649	-0.242399	0.126182	-0.108899	0.215243	-0.404266	0.0899829
C1_08550C	GCF1	-0.542389	-0.483486	-0.703272	-0.311458	-0.521592	-0.211737	-0.300428	-0.112852	0.124794
C1_08560W	TCP1	-0.648835	-0.552006	-1.10916	-0.386718	-0.600683	-0.340182	-0.497389	-0.542856	-0.0427321
C1_08570C	PCL2	-0.284395	-1.19866	0.169164	-1.53588	-0.0268222	-1.22075	-0.0855069	0.0939413	-0.401808
C1_08580C	VCX1	0.00619701	0.0308538	0.548548	-0.16475	0.241894	-0.229439	0.0474582	-0.27948	-0.364542
C1_08590C	ERG1	0.337926	-0.50607	-1.06535	-0.291123	-0.628119	-0.36953	-0.356596	-0.298434	-0.0243553
C1_08600C	GCD6	-0.496671	0.0945538	-0.821774	0.162553	-0.350099	0.250196	-0.424156	-0.0180661	0.305811
C1_08610C	CAALFM_C108610CA	0.799875	0.636703	0.399871	-0.285096	0.166811	-0.23557	0.646115	0.0421246	0.49541
C1_08620W	CTR2	0.776682	0.447402	0.847538	0.00246436	0.494329	-0.0135657	0.752835	-0.179455	-0.183348
C1_08630W	CAALFM_C108630WA	-1.03912	-0.36918	-1.87865	-0.221091	-1.18405	-0.191464	-0.747596	-0.196882	0.0614534
C1_08640W	RTG1	-0.349936	-0.117081	-0.102436	-0.233739	-0.196172	-0.142348	-0.232456	-0.190907	0.0310475
C1_08650C	FAD1	-0.0651752	-0.616688	0.268023	-0.346441	0.180368	-0.372502	0.052878	-0.349191	-0.327042
C1_08660C	CAALFM_C108660CA	-0.320475	-0.297445	-0.438453	-0.447708	-0.400358	-0.551729	-0.314453	-0.338048	-0.210234
C1_08670W	SWI6	-0.212249	-0.17351	-0.241667	-0.330072	-0.266465	-0.230271	-0.0926293	0.0856218	0.0368205
C1_08680C	CAALFM_C108680CA	0.249131	0.0244364	0.558549	-0.0514379	0.351716	-0.212417	0.225318	-0.292204	-0.286891
C1_08690W	CAALFM_C108690WA	-0.633008	-0.88687	-0.61858	-0.629556	-0.298359	-0.628528	-0.569301	-0.499538	-0.194024
C1_08700W	CAALFM_C108700WA	0.124167	-0.00977686	0.0907942	-0.117909	0.0189223	-0.0855898	0.0901687	0.00357792	0.081798
C1_08710W	CAALFM_C108710WA	-0.913608	-0.238268	-1.3301	-0.388372	-0.898502	-0.312152	-0.720768	-0.283712	-0.164174
C1_08730W	CAALFM_C108730WA	-0.254446	0.302441	0.59352	-0.341934	0.532533	-0.139778	-0.0381674	-0.308393	-0.323708
C1_08740C	SEC24	0.0541607	-0.135202	0.0287366	0.00657695	0.235135	-0.114556	0.163675	-0.281373	-0.250964
C1_08750W	YMC2	-0.0912699	1.26588	0.0696405	0.0656668	-0.1881	0.0176813	0.190434	0.841425	-0.151861
C1_08760W	CAALFM_C108760WA	-0.184197	0.037523	0.0614996	0.223849	-0.245924	0.0501352	-0.282217	0.185616	0.283729
C1_08770W	CAALFM_C108770WA	1.34436	1.12321	2.64153	0.366614	0.4937	-0.060011	1.23587	0.865874	-0.179931
C1_08780W	CAALFM_C108780WA	-0.0471908	0.557547	0.370141	-0.0792299	-0.124715	0.0123929	-0.193022	-0.440212	-0.234807
C1_08790W	TPO3	-0.138993	-1.99915	-2.08203	-3.10836	-0.992195	-2.813	-1.52035	-2.95432	-0.737533
C1_08800W	CAALFM_C108800WA	0.542061	0.496968	0.229501	0.224467	0.276519	0.268513	0.428112	0.277675	0.00362379
C1_08810C	MSS116	-1.29717	-0.276477	-2.41723	-0.321751	-1.57363	-0.394996	-1.0559	-0.302159	0.0350042
C1_08820C	CAALFM_C108820CA	-0.335785	0.00366442	-0.88129	0.0597775	-0.346915	0.134629	-0.162407	-0.00969038	-0.00934641
C1_08830C	CAALFM_C108830CA	-0.190635	0.156858	-0.952918	0.42149	-0.735571	0.322478	-0.280791	0.125434	0.0856215
C1_08840W	CAALFM_C108840WA	-0.406686	0.245775	-0.325291	0.311879	-0.32772	0.408471	-0.0770572	0.0225625	0.270074
C1_08850C	AFG1	0.800743	1.83269	2.24068	0.845032	1.95254	0.68781	1.05833	0.940501	0.190282
C1_08860C	CAALFM_C108860CA	0.0698354	0.548923	0.235817	0.273643	0.0908147	0.175865	0.207981	0.231641	0.213251
C1_08870C	JIP5	-0.518588	0.72629	-1.46816	0.560173	-0.763337	0.637641	-0.402957	0.390789	0.374615
C1_08880W	HEM14	0.103589	-0.698757	-0.551712	-0.151489	-0.25061	-0.139465	-0.0490749	-0.0478979	-0.0907596
C1_08890C	CAALFM_C108890CA	-0.350596	-0.0504027	-0.268618	-0.351743	-0.277145	-0.112541	-0.390419	-0.289098	-0.262172
C1_08900W	CAALFM_C108900WA	2.03274	1.88421	2.57035	0.862913	2.81768	1.46735	1.82846	0.285844	-0.587704
C1_08910C	CAALFM_C108910CA	-0.489199	-0.517774	-0.982888	-0.36376	-0.364607	-0.294517	-0.488088	-0.397212	-0.215823
C1_08920W	CAALFM_C108920WA	-1.0068	-1.16597	-1.57991	-0.644745	-0.783129	-0.607898	-0.851159	-0.74723	-0.302027
C1_08930C	CAALFM_C108930CA	-0.695778	-1.63943	-1.3809	-1.31428	-0.932559	-1.27003	-0.735238	-0.9755	-0.829996
C1_08940C	MSN4	1.55565	1.86558	1.97474	1.04429	2.06001	1.19183	1.57212	0.954016	-0.324637
C1_08950W	PFK26	0.101404	0.620189	0.0889624	0.248772	-0.00170583	0.293954	0.0212927	0.0801348	0.1998
C1_08960W	CAALFM_C108960WA	-1.07369	-2.01489	-1.62182	-2.50729	-1.70202	-2.41517	-1.16269	-2.98734	-1.89719
C1_08970W	CAALFM_C108970WA	-0.325774	-1.22128	-0.748254	-1.07634	-0.434802	-1.22689	-0.303251	-1.29003	-1.1805
C1_08980C	ZWF1	0.132347	0.622941	0.178638	0.573591	0.173398	0.455019	0.187498	0.143015	0.0910171
C1_08990C	KEX2	1.12282	0.988083	1.42606	0.625895	0.88432	0.542798	1.09606	0.553839	0.060665
C1_09000W	CAALFM_C109000WA	0.855076	1.19894	1.32349	0.853388	-0.170616	0.133679	1.19759	1.35623	-0.222344
C1_09010W	NAR1	0.504115	0.667455	-0.634392	0.348152	-0.453781	0.268905	0.148215	0.479589	0.291403
C1_09020W	CAALFM_C109020WA	-0.82363	-1.93693	-1.29232	-1.0122	-1.04356	-1.01308	-0.665643	-0.859789	-0.424031
C1_09030C	COX5	-0.21888	-0.875134	-0.554986	-0.429827	-0.803893	-0.52379	-0.143705	-0.276953	-0.129855
C1_09040C	CAALFM_C109040CA	-0.641561	0.267498	-1.56881	0.0509339	-0.861717	0.255074	-0.567387	-0.0881304	-0.00658422
C1_09050W	HST1	0.0917776	0.347617	0.0329929	0.236641	-0.0879503	0.233633	0.170079	0.284691	0.107745
C1_09060C	CAALFM_C109060CA	1.32912	0.233437	1.45117	0.33754	0.765873	0.468126	1.2103	0.895338	-0.248087
C1_09070W	CAALFM_C109070WA	0.0924632	-0.0038187	-0.0165115	0.09776	0.0822529	0.109097	0.110635	0.191376	0.107421
C1_09080C	PGA6	0.504479	0.836536	-0.556983	0.709555	0.147338	0.886558	0.410427	0.791268	0.211672
C1_09090C	ARG81	0.189939	0.229774	0.0830774	0.197013	0.0394356	0.252137	0.186074	0.169718	0.0323188
C1_09100W	ZCF28	-0.074796	0.704561	0.209967	0.325305	-0.349795	0.888264	0.251891	0.925295	0.753768
C1_09110W	CAALFM_C109110WA	-0.090172	-0.206398	0.16485	-0.393655	-0.0280526	-0.132431	0.0421636	-0.033714	-0.30626
C1_09120W	IPT1	0.402135	0.460996	0.84007	0.539623	0.158888	0.127769	0.24527	0.0329959	-0.163674
C1_09130W	CAALFM_C109130WA	1.037	0.936903	1.11923	0.890068	1.02354	1.19356	0.769773	0.0523196	0.469692
C1_09140C	SSU81	0.252891	0.275804	0.227139	0.643205	0.0500265	0.469464	0.247388	0.790793	0.84091
C1_09150W	AOX2	1.26015	-2.67294	-2.53776	-2.5997	-2.18017	-2.03914	-0.32236	-0.900781	1.86809
C1_09160W	AOX1	1.46272	0.877804	1.9399	1.01441	0.68729	0.386119	1.58002	1.27214	0.24154
C1_09170W	CTA8	-0.195852	0.438141	-0.250755	0.0869527	-0.296056	-0.0251966	-0.0910961	0.136166	-0.24014
C1_09180W	LYS143	0.499605	0.893713	0.788787	0.357094	1.12019	0.836326	0.504985	0.335558	0.21379
C1_09190C	DAK2	0.907241	0.0718125	0.463312	0.235629	0.222546	0.361988	0.532306	0.291229	-0.0986947
C1_09200W	LYS142	0.323	-0.672583	0.611511	-0.366224	0.341429	-0.220724	0.372275	0.0911939	-0.0649078
C1_09210C	CAALFM_C109210CA	0.22219	-0.973899	-0.628431	-0.796849	-1.23259	-1.25575	-0.267045	-0.997383	-0.315886
C1_09220W	CAALFM_C109220WA	0.731566	0.854594	1.07263	0.422712	0.876407	0.386625	0.658178	0.419348	-0.0240419
C1_09230C	GRP1	-0.321242	0.127197	-0.473309	-0.318094	-0.168501	-0.060684	-0.152223	-0.105785	-0.0222979
C1_09240C	CAALFM_C109240CA	-0.0147873	-2.26097	-0.233708	-1.32539	-0.783433	-1.32109	0.786593	1.01101	-1.8593
C1_09250W	CRP1	1.13772	0.764502	2.23867	1.28488	2.10862	1.71606	1.67325	0.0857013	0.283048
C1_09260C	PTC1	-0.220993	-0.0534614	-0.0384655	-0.170465	-0.0675467	-0.121399	-0.159666	0.199549	0.0613439
C1_09270W	FGR43	0.840584	0.35787	1.08516	0.384383	0.846124	0.524524	0.967308	0.499599	0.326426
C1_09280W	CAALFM_C109280WA	0.0698062	0.0292166	0.115305	0.0607043	0.135893	0.0759771	0.096968	0.10682	0.150328
C1_09290C	ARG5,6	-0.331496	4.19215	-0.334399	0.662645	-0.372361	0.745055	-0.547082	-0.111493	0.321609
C1_09300C	CAALFM_C109300CA	-2.39684	2.56433	0.292428	1.05154	-1.24625	0.00641316	-2.37964	-2.21784	0.630268
C1_09310C	CAALFM_C109310CA	1.59262	2.2076	2.89338	1.49346	1.42028	1.49525	1.51082	1.18426	0.212388
C1_09320C	CAALFM_C109320CA	0.487079	1.77012	-0.103728	1.35491	0.420893	1.40733	0.559606	-0.39434	0.545323
C1_09330W	CAALFM_C109330WA	-0.371057	0.596879	-1.20528	0.490898	-0.662362	0.49822	-0.302349	0.246942	0.26708
C1_09340C	CAALFM_C109340CA	1.51389	2.5923	3.00659	1.21214	2.30164	1.1403	1.38579	1.13215	0.193917
C1_09350W	CAALFM_C109350WA	-0.531073	-0.632097	-0.407086	-0.25124	-0.210904	-0.18901	-0.304566	-0.370443	-0.132972
C1_09360C	CAALFM_C109360CA	0.12081	0.199801	0.412438	0.174416	0.261901	0.138304	0.180092	0.161668	0.0772608
C1_09370W	CEF1	-0.0156911	0.805324	-0.378411	0.506146	-0.405843	0.497265	0.0656334	0.587643	0.506839
C1_09380W	RIM20	0.440283	0.0469778	0.787204	0.0310763	0.575032	0.201759	0.705476	0.331712	0.0436363
C1_09390W	CAALFM_C109390WA	-0.171451	0.717527	-0.607601	0.675279	-0.206003	0.642485	-0.0867404	0.623754	0.476721
C1_09400C	FTH1	3.24783	5.21118	4.88556	2.61075	4.51373	2.26427	3.55363	3.61803	-0.109107
C1_09420W	LIP2	1.46026	1.99562	0.0860531	0.762337	0.736818	0.699273	1.82885	0.0607016	-0.0329633
C1_09430W	CAALFM_C109430WA	0.555038	0.435332	0.447152	0.219104	0.765305	0.604608	0.438073	-0.193116	-0.277214
C1_09440W	CAALFM_C109440WA	0.0195945	-0.613788	0.376909	-0.55043	-0.0391114	-0.593828	0.403751	0.604869	-0.199149
C1_09450C	NUP188	-0.313431	0.0056754	-0.534407	0.158453	-0.351386	0.0995184	-0.125869	0.151036	0.154411
C1_09460W	ERG12	-0.330672	-0.567518	-0.381403	-0.39228	0.0593844	-0.203711	-0.303585	-0.451224	-0.14364
C1_09470C	CAALFM_C109470CA	-0.696697	-0.581742	-0.424946	-0.33228	-0.374115	-0.381208	-0.49374	-0.373884	-0.213547
C1_09480W	PPT2	-0.0545744	0.274445	0.304831	0.406898	-0.00441343	0.0793976	0.13815	0.152351	0.0939135
C1_09490C	GUA1	-1.08871	-0.309798	-1.63043	-0.0979807	-0.883502	-0.0724319	-0.839484	-0.126372	0.179826
C1_09500W	CAALFM_C109500WA	-1.22475	-0.167185	-1.66063	0.388758	-0.643956	-0.132679	-0.729158	-0.0808271	-0.272648
C1_09510W	YTM1	-0.648568	0.460407	-1.42805	0.279591	-0.718473	0.284488	-0.534959	0.158346	0.116586
C1_09520C	CAALFM_C109520CA	0.0439212	0.139757	-0.0489816	0.183991	-0.0696833	0.118138	0.125008	0.169731	0.0749128
C1_09530W	RAM2	0.25001	-0.0278573	0.212132	-0.203416	0.272122	-0.136922	0.256866	-0.0936315	-0.221913
C1_09540W	CAALFM_C109540WA	-0.0705015	0.196041	-0.267644	-0.20901	-0.127665	-0.154494	-0.149854	-0.0342413	0.198468
C1_09550W	CAALFM_C109550WA	-0.169916	-0.391375	-0.230295	-0.630009	-0.5349	-1.07822	-0.0519371	-0.592213	-0.549591
C1_09570W	CAALFM_C109570WA	-0.758417	-0.626071	-1.11961	-0.515259	-0.845358	-0.495715	-0.803971	-0.621775	-0.205489
C1_09580C	LIP1	2.08485	1.99599	3.27702	1.40072	0.861846	1.40323	1.79078	1.10531	-0.543016
C1_09590C	LIP10	0.845959	1.0984	-1.52589	0.34235	0.127745	0.43588	0.202399	-1.22697	#NAME?
C1_09600C	LIP6	-0.0510105	-0.364516	0.156302	-0.208583	0.122456	-0.441292	0.057735	0.0114035	-0.377216
C1_09610W	CAALFM_C109610WA	-0.351594	-0.545509	-0.100941	-0.253076	-0.20545	-0.533838	-0.0566113	-0.0236055	-0.234325
C1_09620C	CAALFM_C109620CA	-0.347102	-0.436562	-0.290629	-0.370538	-0.183758	-0.101902	-0.201125	-0.288346	0.00840737
C1_09630W	IDH1	-0.918243	-0.341753	-0.850284	-0.317259	-0.442279	-0.352318	-0.668663	-0.347513	0.0275714
C1_09640W	ADE12	-1.06827	-0.336262	-0.670555	-0.0642373	-0.324321	-0.162677	-0.85175	-0.327375	-0.214591
C1_09650W	CAALFM_C109650WA	1.32173	-0.0103707	1.78483	0.451446	1.14388	0.462925	1.27438	0.396772	-0.134769
C1_09660W	DOA1	0.041068	0.0872356	0.0983796	0.247217	0.214779	0.34752	0.195855	0.162467	0.143927
C1_09670C	CAALFM_C109670CA	0.121861	-0.188879	0.396049	-0.0366772	0.192281	-0.220838	0.191151	-0.099747	-0.27792
C1_09680W	MTS1	-0.630329	-0.687081	-1.07314	-0.528742	-0.2735	-0.505336	-0.639872	-0.59637	-0.357799
C1_09690W	MLS1	2.16117	1.21311	5.20458	0.44634	0.0863354	0.0390843	2.2862	1.97243	-0.265809
C1_09700W	CAALFM_C109700WA	-0.457285	0.33607	0.115131	0.000201451	0.460729	0.0321346	1.01363	0.28323	-0.980798
C1_09710C	CAALFM_C109710CA	-0.534351	0.605684	-1.17706	0.518131	-0.735135	0.336878	-0.389807	0.377093	0.271683
C1_09720W	URA1	-0.22428	-0.188333	-0.694457	-0.0905545	-0.165457	-0.0280563	-0.253524	-0.134983	-0.256662
C1_09730W	DAM1	-0.0279654	-0.465985	0.236322	-0.368182	0.0669042	-0.510495	0.126632	0.00355808	-0.302927
C1_09740C	CAALFM_C109740CA	0.227378	-0.101439	0.386259	-0.0987946	0.254147	0.23538	0.25492	-0.0294798	0.0522979
C1_09750W	CAALFM_C109750WA	0.247064	0.432788	0.4328	0.494129	0.329509	0.417288	0.190439	0.354049	0.0963104
C1_09760C	SHY1	-0.300097	0.00143705	-0.368383	-0.0345604	-0.247127	-0.102878	-0.119782	0.0255408	-0.00272346
C1_09770W	CAALFM_C109770WA	1.17191	0.922433	1.69227	0.158371	0.790042	0.00725881	0.999374	0.300656	0.0764512
C1_09780C	CAALFM_C109780CA	0.795535	1.54371	1.37079	0.700111	0.478624	0.0643393	0.681528	0.61634	-0.0160845
C1_09790C	CAALFM_C109790CA	-0.657255	0.0713528	-0.937443	0.0121924	-0.492209	0.0191542	-0.525847	-0.166333	0.109997
C1_09800C	TVP18	-0.290057	-0.404962	-0.302481	-0.315621	-0.031032	-0.482694	-0.233983	-0.45251	-0.383738
C1_09810W	CAALFM_C109810WA	-0.707964	-0.711161	-0.917827	-0.423631	-0.341242	-0.151199	-0.494719	-0.280257	-0.0807303
C1_09820C	CAALFM_C109820CA	-0.667988	-0.600422	-0.831579	-0.21193	-0.300764	0.106515	-0.541193	-0.0686824	0.0569298
C1_09830W	SKI3	-0.293971	-0.150057	-0.349117	0.0643683	-0.229195	0.0910931	-0.0848776	0.126025	0.209138
C1_09840C	CAALFM_C109840CA	0.385014	0.773342	0.262714	0.474128	0.276747	0.28959	0.510137	0.323268	0.0419351
C1_09850C	CAALFM_C109850CA	0.218548	0.295852	-0.00468513	0.149247	-0.00972529	0.113488	0.355074	0.371508	0.244537
C1_09860C	TFA1	-0.164733	-0.223592	-0.106574	-0.258309	0.0721475	-0.0386484	-0.185011	-0.0286679	-0.0120491
C1_09870W	HCM1	-0.284186	-0.332218	-0.298868	-1.08785	-0.513048	-0.920554	-0.25214	-0.0472569	-0.353591
C1_09880C	BUD31	-0.400585	-8.9e-05	-0.356704	-0.0743287	-0.113856	0.0812043	-0.31105	0.0217262	-0.106965
C1_09900W	LIP3	-0.262592	-1.10874	-1.65393	-0.939827	-1.62633	-0.422715	-0.0271612	0.5238	0.291801
C1_09910C	CAALFM_C109910CA	-0.576535	-0.89642	0.137219	-0.485103	0.142304	-0.538626	-0.379652	-0.329872	-0.399033
C1_09920W	VPS41	0.484031	0.353663	0.797334	0.0760667	0.557401	0.152913	0.481278	0.370222	0.0530417
C1_09930W	CAALFM_C109930WA	0.537122	0.283404	0.447988	0.523371	0.419882	0.491454	0.534428	0.441671	0.036863
C1_09940W	CAALFM_C109940WA	0.0726457	-0.326642	0.371304	-0.345797	0.369167	-0.368208	0.130043	-0.187363	-0.519106
C1_09950C	CAALFM_C109950CA	0.265702	0.371801	0.33427	0.181147	0.215407	0.195717	0.147345	0.400359	0.0380285
C1_09960W	PET100	-0.241283	-0.311207	-0.300121	-0.0906649	-0.224431	-0.230238	-0.230045	-0.261486	-0.00963995
C1_09970C	PDC2	-0.462479	-0.42226	-0.3537	-0.424936	-0.296036	-0.25534	-0.461867	-0.0561648	0.0218164
C1_09980C	CAALFM_C109980CA	0.460855	0.124982	0.638925	0.243091	0.469008	0.307471	0.638703	0.552644	-0.147028
C1_09990W	SAC1	0.00886345	0.102675	-0.238993	-0.00823407	-0.173409	0.0333709	0.0875785	0.0664934	-0.0744783
C1_10000C	CPP1	0.258305	0.561983	-0.0348406	0.0675897	-0.0463756	0.15047	0.171599	-0.038023	0.156551
C1_10010C	SWE1	-0.208221	-0.361571	-0.461586	-0.325808	-0.415987	-0.37077	-0.183311	-0.059956	-0.133483
C1_10020W	SFU1	-0.628105	-1.48217	-1.42502	-1.65934	-1.25879	-1.50764	-0.884421	-1.7729	-0.620048
C1_10030W	DBP3	-0.905937	0.445051	-1.8852	0.12211	-0.963328	0.21628	-0.787703	0.0160956	0.225721
C1_10040W	ERO1	0.359382	0.392933	-0.251888	0.415336	0.212985	0.353009	0.487782	0.263783	0.284017
C1_10050W	CAALFM_C110050WA	1.91445	1.87967	-0.206779	0.711676	0.830009	-0.0272421	2.15469	0.1317	-0.587779
C1_10060C	CAALFM_C110060CA	0.815593	4.97556	5.12825	4.16579	1.12327	3.25923	0.943486	2.19302	5.33307
C1_10070C	MNN23	-0.358813	0.245287	-0.451141	0.0272715	-0.33689	0.0515315	-0.252679	0.0817169	-0.0987518
C1_10080W	CAALFM_C110080WA	-0.660017	-0.362614	-0.911844	-0.370691	-0.490403	-0.394979	-0.455756	-0.169881	-0.144373
C1_10090C	CAALFM_C110090CA	0.567249	0.483729	0.727066	0.164347	0.585061	0.325494	0.627336	0.336011	0.0175555
C1_10100C	NTF2	-0.25733	-0.576033	-0.330714	-0.377544	-0.0260473	-0.326338	-0.231926	-0.421678	-0.270081
C1_10110W	CAALFM_C110110WA	-0.988039	-0.47024	-0.696331	-0.191441	-0.975473	-0.506401	-0.740499	-0.61318	-0.376845
C1_10120C	CAALFM_C110120CA	-0.204411	-0.159694	-0.157731	-0.0614024	-0.182454	-0.13715	-0.227109	-0.329184	-0.0949507
C1_10130W	CAALFM_C110130WA	-1.59797	-2.98461	-1.02743	-0.881125	-2.73888	NAME?	-1.13396	-0.721962	#N/A
C1_10140C	CAALFM_C110140CA	1.10895	0.908892	1.6558	0.547889	0.908229	0.35454	1.84227	1.87495	0.163499
C1_10150W	WOR1	-0.462661	-0.15752	-1.52524	-0.787931	-0.427769	-2.15798	-0.44126	-2.39314	-0.516468
C1_10160W	MIR1	-1.19766	-0.651258	-1.5332	-0.577417	-1.02834	-0.378246	-0.912447	-0.344377	0.0103
C1_10170W	CAALFM_C110170WA	1.74161	0.151643	1.51782	-0.145474	0.344539	-0.750316	1.43088	-1.09601	-0.991574
C1_10180C	ECM21	0.935341	0.533719	0.268672	0.0662994	-0.0379949	0.254998	0.83667	0.576048	0.280742
C1_10190W	CAALFM_C110190WA	-0.506773	-0.437194	-0.51088	-0.360113	-0.483515	-0.330393	-0.394936	-0.20279	-3.74795e-05
C1_10200C	CAALFM_C110200CA	-0.228404	-0.0283881	-0.620898	0.158439	-0.0781205	0.104864	-0.139015	0.0216119	0.0561351
C1_10210C	CLA4	0.759437	0.561947	0.463159	0.221763	0.789284	0.528997	0.575435	0.00752732	-0.181442
C1_10220C	TPK1	-0.410286	0.113711	-1.03294	0.0943486	-0.372419	0.563147	-0.198234	-0.0747864	0.228115
C1_10230C	CAALFM_C110230CA	0.682805	0.566569	0.856855	0.311297	0.545606	0.223804	0.585886	0.731792	0.217683
C1_10240C	CAALFM_C110240CA	3.14388	3.04752	4.68487	2.11101	3.1932	1.97602	3.50395	3.09272	-0.038667
C1_10250C	CAALFM_C110250CA	-0.300853	0.243304	-0.684614	0.246961	-0.255971	0.22935	-0.222112	0.195428	0.202918
C1_10260C	RPA34	-0.753314	0.06874	-1.26839	-0.0957754	-0.862573	-0.10589	-0.642564	-0.237988	-0.085532
C1_10270C	SFH5	0.489447	0.162132	0.444424	0.0379887	0.549603	0.179786	0.41622	-0.204864	-0.0354928
C1_10280C	CAALFM_C110280CA	0.935964	0.14215	1.33878	-0.0878844	0.859882	0.03766	1.0314	0.0803504	-0.436386
C1_10290W	GCA1	3.45161	0.312552	1.70589	0.370638	1.39384	0.642641	1.23859	0.510552	-0.506254
C1_10300W	MNN12	1.06579	0.908961	0.243601	0.0269542	2.27217	2.32497	0.592513	-0.451279	-0.0676032
C1_10310W	CAALFM_C110310WA	0.487499	-0.459704	1.05814	-0.311058	0.514144	-0.235879	0.730273	-0.339596	-0.213218
C1_10320W	CAALFM_C110320WA	0.0802805	-0.106346	-0.084266	0.150907	0.15669	0.319906	-0.010048	0.0431149	-0.260538
C1_10330C	CAALFM_C110330CA	-0.135341	0.346	-0.078199	0.268104	0.0855349	0.313593	-0.09908	0.37492	0.223552
C1_10340W	CAALFM_C110340WA	0.37902	1.10752	1.27659	0.519469	1.4753	0.515518	0.377013	0.4438	-0.28571
C1_10350C	CAALFM_C110350CA	-0.284071	0.459502	-0.73252	0.3955	-0.111943	0.727305	-0.429182	-0.165264	0.140528
C1_10360C	CAALFM_C110360CA	0.810996	-0.286694	0.29263	-0.358174	-0.241853	-0.45774	0.277293	-0.362147	-0.412513
C1_10380C	CBK1	-0.244297	-0.20842	-0.419471	-0.224938	-0.242694	-0.159525	-0.0903432	-0.157045	0.0189337
C1_10390C	RPL42	-1.05054	-1.36365	-1.7631	-1.24608	-0.856811	-1.04062	-1.19716	-1.31888	-0.511553
C1_10400C	FGR41	-0.0605015	0.334541	-0.138272	-0.519555	0.160705	0.0882322	0.260575	-0.0342632	-0.521781
C1_10410W	CAALFM_C110410WA	-0.210763	-0.0870509	0.133914	-0.0168082	-0.192627	0.119223	-0.0157844	-0.110352	0.101389
C1_10420C	CAALFM_C110420CA	0.260907	0.343195	0.538364	-0.298056	0.337398	-0.0599362	0.171316	-0.176511	-0.403937
C1_10430W	PHO8	1.04864	2.60293	0.8188	1.55822	1.14141	3.94033	1.86569	3.37519	0.434098
C1_10440W	CAALFM_C110440WA	-0.0543694	0.3571	-0.297722	0.18363	-0.128568	0.0931973	-0.160444	0.079516	0.0719628
C1_10450W	GLY1	0.636325	-0.326202	0.653693	0.172468	-0.282088	0.0484573	0.947766	1.45658	0.149318
C1_10460W	CAALFM_C110460WA	0.631931	0.295583	0.557514	-0.361665	0.503593	-0.220112	0.550791	0.242871	-0.322193
C1_10470W	CAALFM_C110470WA	-1.09008	-1.11585	-1.70521	-0.646024	-0.996122	-0.672093	-0.913501	-0.650916	-0.318234
C1_10480W	DJP1	0.107489	0.233255	0.283863	0.157909	0.0170407	0.133968	0.183952	0.217269	0.000806022
C1_10490W	LKH1	-0.488239	-0.365447	-0.692757	-0.275706	-0.364154	-0.102501	-0.426989	-0.275437	-0.134163
C1_10500W	CAALFM_C110500WA	-0.0593898	-0.144952	-0.187553	-0.206484	-0.155553	-0.176335	-0.0494414	0.109214	0.0562845
C1_10510W	CAALFM_C110510WA	0.668622	0.294192	1.10333	-0.300517	0.646599	0.0959178	0.844081	0.26516	-0.229825
C1_10520W	CAALFM_C110520WA	1.46062	1.30773	1.80366	1.25503	1.00938	1.29425	1.55602	2.10108	0.761093
C1_10530W	SNL1	-0.439224	-0.987102	-0.0772296	-0.83006	-0.112646	-0.999217	-0.391449	-0.932948	-0.813751
C1_10540C	CAALFM_C110540CA	0.116968	0.0226919	0.292369	-0.126623	0.214535	-0.0796339	0.225652	0.155873	-0.0383458
C1_10550C	GCA2	1.43048	0.596122	2.17854	0.72914	0.915756	0.36685	1.32887	1.23219	-0.171419
C1_10560C	CAALFM_C110560CA	0.739395	0.785819	1.14678	1.2203	0.774537	1.20676	0.776052	0.999783	0.882293
C1_10570C	CAALFM_C110570CA	0.916877	1.32677	0.241523	1.02924	-0.438338	0.298297	0.932827	1.32561	-0.419344
C1_10580C	CAALFM_C110580CA	1.0109	2.69908	1.885	2.2806	0.418455	2.36	1.15877	1.67969	1.61593
C1_10610W	FCY23	-0.986669	0.205273	-0.494469	-0.157997	-0.249866	-0.111465	-0.861655	-0.697167	-0.0934714
C1_10620W	CAALFM_C110620WA	-0.977341	-0.168172	-1.91157	-0.129228	-1.16292	-0.0770592	-0.907965	-0.264415	0.168198
C1_10630C	CAALFM_C110630CA	-0.0056186	-0.402633	-0.453742	-0.545013	0.0684937	-0.144438	-0.206529	-0.194627	-0.207054
C1_10640C	PEA2	-0.0800102	0.0386877	-0.223854	-0.0458777	0.00779821	0.00544675	-0.0372478	0.0791557	-0.0423924
C1_10650W	APN2	-0.299036	-0.181422	-0.34297	0.173789	-0.320253	0.0373194	-0.204621	0.386635	0.294513
C1_10660W	TBP1	-0.223041	-0.499917	0.0786855	-0.518735	-0.172685	-0.770435	-0.250276	-0.674497	-0.460808
C1_10670C	RPA190	-0.835258	-0.200325	-1.5036	-0.136218	-0.76687	-0.0881046	-0.761079	-0.200388	0.0218621
C1_10680C	CAALFM_C110680CA	0.58553	0.597709	0.597791	0.516953	0.528457	0.494866	0.553172	0.335156	0.140447
C1_10690W	CAALFM_C110690WA	-0.606279	-0.711648	-0.598966	-0.548675	-0.335824	-0.406155	-0.459135	-0.496347	-0.266712
C1_10700C	NIT3	-0.478922	0.097643	0.491383	-0.0158179	0.101941	0.0239077	-0.234636	-0.292418	-0.20931
C1_10710C	CAALFM_C110710CA	0.569317	-0.0848887	1.20041	0.403795	-0.228201	-1.11203	0.267912	-0.362146	0.811477
C1_10720C	MNN2	-0.346705	-0.303181	-0.814004	-0.0868613	-0.477157	-0.17756	-0.342654	-0.0877452	0.0738349
C1_10730W	CAALFM_C110730WA	0.19595	0.685346	0.838848	0.79302	0.376833	0.759324	0.339766	0.412187	0.242263
C1_10740C	ASR1	2.19075	0.512223	2.31287	0.137459	1.31375	1.20605	2.008	0.992114	-0.320371
C1_10750C	CAALFM_C110750CA	0.0206521	0.258264	0.433603	0.00757142	0.137872	-0.062804	0.0925058	-0.0524655	-0.170694
C1_10760W	VPS23	-0.256744	-0.266451	-0.117388	-0.38445	0.0285802	-0.296928	-0.224859	-0.322032	-0.305027
C1_10770W	SFT2	0.284265	0.308278	0.641535	0.245524	0.567871	0.115159	0.454205	0.226448	-0.0863742
C1_10780C	HNT1	-0.411429	-0.895526	0.261515	-0.470669	-0.0427488	-0.370475	-0.251015	-0.470288	-0.413437
C1_10790W	CDC48	-0.196078	-0.0194061	-0.255219	-0.107645	-0.136019	-0.0260639	-0.0226836	-0.179715	0.0332432
C1_10800C	ALP1	0.613944	0.934365	-0.681504	0.441383	-0.788188	0.100792	0.449322	0.950704	-0.0897045
C1_10810W	CAALFM_C110810WA	1.22158	1.64508	0.237334	-0.193023	-0.948128	-0.693633	1.14664	1.49246	-0.337976
C1_10820C	CAALFM_C110820CA	-0.227055	-0.318462	-0.527967	-0.284938	-0.299354	0.0890208	-0.18196	-0.0485539	0.116221
C1_10830W	BIG1	0.00441102	-0.550662	-0.176078	-0.34502	-0.054929	-0.305016	-0.106122	-0.314757	-0.356104
C1_10840C	CAALFM_C110840CA	0.224651	-0.0742653	-0.707585	-0.491166	-0.315651	-0.388407	-0.0232847	-0.336635	-0.502203
C1_10850W	CAALFM_C110850WA	-1.05568	-0.0158876	-0.418342	-1.74642	-0.509163	-0.84424	-0.138978	-1.2715	-1.28651
C1_10860C	ADA2	-0.42547	-0.730217	-0.271156	-0.742358	0.0312284	-0.81583	-0.294589	-0.558787	-0.534127
C1_10870W	RPS17B	-0.731591	-0.756626	-1.19643	-0.202397	-0.54487	-0.243439	-0.631281	-0.450824	0.19262
C1_10880W	CAALFM_C110880WA	-0.568659	0.455448	-1.13924	0.361568	-0.595598	0.314799	-0.428281	0.301995	0.341725
C1_10890C	CAALFM_C110890CA	0.257538	0.0232626	0.391809	0.21916	0.389537	0.10861	0.354239	0.200035	-0.177194
C1_10910C	CAALFM_C110910CA	-0.565614	-0.320756	-0.804948	-0.211307	-0.522915	-0.233675	-0.49273	-0.356358	-0.309304
C1_10920W	CAALFM_C110920WA	-0.193627	-0.0241963	0.00498921	0.198806	-0.0991041	0.151787	0.0601883	0.303124	0.260009
C1_10930C	UBA4	-0.488834	-0.01585	-0.988054	0.0432603	-0.502955	0.0202658	-0.507794	-0.0862923	0.163083
C1_10940C	ERP5	0.268231	-0.239979	0.0385405	-0.169586	0.33805	-0.163799	0.258032	-0.167563	-0.40336
C1_10950C	CAALFM_C110950CA	-0.751667	0.120476	-1.31342	0.111498	-0.762461	0.12696	-0.642687	0.0114273	0.183618
C1_10960W	CAALFM_C110960WA	-0.0816578	-0.0576817	-0.326108	0.0431722	-0.0245462	-0.0460977	-0.100753	-0.0807079	-0.0487986
C1_10970W	CAALFM_C110970WA	-0.535488	0.59548	-1.36912	0.553501	-0.767921	0.673524	-0.397712	0.600139	0.596395
C1_10980W	CAALFM_C110980WA	0.822482	-0.110925	0.823248	-0.481313	0.915756	-0.0239366	0.858812	-0.32592	-0.531118
C1_10990C	RTG3	-0.29465	-0.17987	-0.304371	-0.260766	-0.236064	-0.339585	-0.277718	-0.247093	-0.131194
C1_11000C	CAALFM_C111000CA	-0.888543	-0.000851252	-1.57866	-0.175243	-1.02538	-0.314232	-0.799404	-0.374238	-0.236491
C1_11010C	CAALFM_C111010CA	0.230017	-0.445185	0.513329	-0.189534	0.295624	-0.228425	0.329425	-0.0547204	-0.464574
C1_11020W	CAALFM_C111020WA	-0.291536	-0.0380503	-0.368642	0.220845	-0.28154	0.301447	-0.196881	0.0999768	0.317672
C1_11030W	RPL82	-0.764367	-0.818853	-1.07338	-0.607646	-0.369901	-0.552085	-0.67862	-0.597742	-0.417621
C1_11040W	RPL29	-0.674973	-0.785195	-0.966335	-0.284754	-0.363367	-0.228768	-0.614369	-0.363653	0.116185
C1_11050W	CAALFM_C111050WA	-0.362196	-0.162668	-1.03199	-0.132528	-0.195671	0.00161597	0.0801321	-0.0378269	-0.304871
C1_11060C	RPL2	-0.925073	-0.737626	-1.42354	-0.353723	-0.658149	-0.319041	-0.745323	-0.399831	0.0739698
C1_11070W	PET127	-1.07456	-0.121097	-1.8954	0.150785	-1.23876	0.0927634	-0.82434	0.0702449	0.109101
C1_11080W	CAALFM_C111080WA	0.676478	1.65998	0.141046	1.13508	0.101215	1.16452	0.462941	-0.795766	0.520324
C1_11090C	CAALFM_C111090CA	-0.0819354	0.20513	-0.348611	0.0283521	-0.120366	0.0673371	0.0736359	0.25113	0.0663043
C1_11100W	CAALFM_C111100WA	-0.4531	-0.389508	-0.298191	-0.391795	-0.121211	-0.239373	-0.313751	-0.248604	-0.369029
C1_11110C	CAALFM_C111110CA	-0.466827	-0.821428	-0.733987	-0.628856	-0.228192	-0.623498	-0.65718	-0.848776	-0.521402
C1_11120C	CAALFM_C111120CA	0.121612	0.0410657	0.34844	0.137012	0.351794	0.128834	0.0736956	-0.138183	-0.116788
C1_11130W	FGR16	-0.0435016	0.486967	0.290977	0.569416	0.413436	0.418662	0.0428539	0.118206	0.0484196
C1_11140W	CAALFM_C111140WA	-0.132899	0.00483868	0.70607	-0.178239	0.389919	-0.193838	-0.269546	-0.752292	-0.623354
C1_11150W	CAALFM_C111150WA	-0.499068	-0.751976	-0.0968027	-0.584985	-0.11661	-0.423244	-0.174509	-0.332578	-0.363474
C1_11160C	CAALFM_C111160CA	-0.638473	-0.1694	-0.862986	-0.0803585	-0.517846	-0.244258	-0.538334	-0.360708	-0.107754
C1_11170W	WBP1	0.0112602	-0.213839	-0.057905	-0.0762135	0.165636	-0.19053	0.0382787	-0.173724	-0.193885
C1_11190W	ARL3	0.110153	-0.508161	0.335259	-0.169557	0.544776	-0.267739	0.200167	-0.131118	-0.112174
C1_11200W	CAALFM_C111200WA	2.92436	2.22831	2.77413	1.74464	1.95179	2.00404	2.79049	2.63169	0.620684
C1_11210C	HAP43	0.858718	1.77024	1.99582	0.494043	1.93609	0.683201	1.24085	1.19122	-0.163428
C1_11220C	TIM50	-1.07011	-0.924476	-1.66284	-0.530773	-0.860811	-0.554574	-0.861939	-0.469157	-0.153111
C1_11230W	FGR39	-0.727238	-0.796396	-0.941905	-0.332074	-0.53182	-0.40699	-0.594122	-0.406489	-0.125787
C1_11240C	CHO1	-0.131042	0.0302911	-0.116127	0.114957	0.0180568	0.119108	-0.177478	-0.187484	-0.175949
C1_11250W	CAALFM_C111250WA	0.703763	0.165555	1.02722	-0.11391	0.863866	-0.039723	0.519458	-0.177222	-0.115248
C1_11260C	CAALFM_C111260CA	0.570946	1.04581	-0.194525	-0.27095	-1.03666	-2.21908	1.14163	-1.70185	-1.71927
C1_11270W	CAALFM_C111270WA	2.28815	1.29108	2.26005	1.33741	0.890261	1.59781	1.71246	-0.974138	2.15361
C1_11280W	CAALFM_C111280WA	0.419046	0.620787	0.000892379	0.492474	0.394087	0.943226	0.295202	-0.0341036	0.380161
C1_11290W	CAALFM_C111290WA	0.273649	0.157407	0.753662	0.0595245	0.16371	-0.32369	0.478821	0.0260851	-0.359306
C1_11300C	CAALFM_C111300CA	0.0232724	0.212845	-0.011293	0.370331	-0.0945341	0.301843	0.072168	0.420653	0.35231
C1_11310C	PSP1	0.268437	0.00136876	0.297687	-0.307504	0.232561	-0.13048	0.307887	0.264108	-0.0203629
C1_11320C	CAALFM_C111320CA	5.71452	-0.457455	4.95108	-0.63702	-0.453475	0.173822	5.02638	3.67547	2.14359
C1_11330C	SMT3	0.0812153	-0.669259	-0.0408315	-0.478178	-0.0693383	-0.55938	-0.0511657	-0.461622	-0.511789
C1_11340W	PRM1	0.823639	0.638729	0.701998	0.766595	-0.0985929	0.371983	0.901368	0.841707	-0.000921191
C1_11350C	TOS4	-0.485491	-0.452459	-0.738945	-0.334173	-0.220581	-0.268209	-0.369597	-0.229526	-0.121228
C1_11360W	RPL37B	-0.906422	-0.90609	-1.10333	-0.512857	-0.449072	-0.372093	-0.775964	-0.580318	0.02121
C1_11370C	CAALFM_C111370CA	-0.28468	0.364119	0.163947	0.228871	0.221521	0.515342	-0.168606	0.248195	0.20524
C1_11380W	NEP1	-0.850985	-0.0603221	-1.23093	-0.12644	-0.542249	-0.011888	-0.787704	-0.244668	0.0616734
C1_11390W	CAALFM_C111390WA	1.00972	-0.434165	0.59334	0.0813543	0.533914	0.422723	0.617602	0.631046	-0.150447
C1_11400C	GIN4	-0.0131756	0.017492	-0.101768	-0.149796	-0.314232	-0.0433346	0.0133228	0.0295164	0.117809
C1_11410C	CAALFM_C111410CA	-0.526312	0.264514	-0.732076	0.085353	-0.520743	-0.218649	-0.454312	-0.406564	-0.733374
C1_11420W	KRR1	-0.388982	0.525814	-1.16657	0.252525	-0.645298	0.335396	-0.292243	0.178689	0.213254
C1_11430W	CAALFM_C111430WA	0.0523999	0.0216786	0.280918	0.144257	0.140012	0.169531	0.0626311	0.442103	0.142869
C1_11440C	GIN1	-0.121245	-0.0882489	-0.217702	-0.0327321	-0.159173	0.110402	-0.04679	0.145417	0.186591
C1_11450C	SAM2	-0.819087	-0.0438806	-1.05292	0.0735225	-0.456743	-0.090778	-0.839038	-0.371844	-0.394429
C1_11470C	DPP1	0.132399	0.763362	0.00734253	0.233168	0.362935	1.00895	0.344314	0.615269	0.0250006
C1_11480W	PHO84	-0.573816	1.77595	-1.73703	0.533392	-0.486781	1.71467	-0.365282	1.19416	0.843394
C1_11490C	BTA1	0.58308	1.44609	-0.24691	1.46527	-0.239635	0.112874	0.673799	1.38545	-0.67306
C1_11500C	ARO7	-0.284692	-0.466768	-0.521016	-0.35822	-0.0822868	-0.193797	-0.191259	-0.210441	-0.142232
C1_11510C	CAALFM_C111510CA	0.464251	0.765214	0.768815	-0.592743	0.504499	-0.686911	0.556995	-0.202319	-0.878143
C1_11520C	ZCF3	-0.300451	-1.71109	0.156661	-0.672058	-0.346779	-1.44289	-0.42958	-0.564068	-0.323192
C1_11530C	CAALFM_C111530CA	1.27858	0.544546	1.4625	1.12478	0.586741	0.486476	1.44172	1.46304	-0.120876
C1_11540C	CTA3	-0.0577472	-0.105576	-0.329474	-0.264018	-0.122649	-0.0761341	0.0423352	-0.116387	-0.0577206
C1_11550W	GAR1	-0.954988	-0.489729	-1.58235	-0.320623	-0.847	-0.221237	-0.8352	-0.312715	0.0660823
C1_11560C	CAALFM_C111560CA	-0.559797	-0.122459	-0.717875	-0.0781868	-0.523376	-0.104874	-0.465807	-0.0469837	-0.11903
C1_11570W	CAALFM_C111570WA	0.787243	0.910873	0.752756	0.778496	0.573361	0.698757	0.565901	0.651432	0.306661
C1_11580W	CAALFM_C111580WA	0.719828	0.244254	1.10602	0.537668	0.796062	0.409131	0.579524	0.359837	-0.221711
C1_11590W	PLD1	0.732238	0.692522	0.872791	0.548847	0.704674	0.418297	0.785373	0.187272	-0.120452
C1_11600W	CAALFM_C111600WA	-0.328421	-0.688239	-0.160449	-0.608127	-0.090324	-0.692839	-0.25876	-0.448111	-0.423591
C1_11610C	CAALFM_C111610CA	0.688224	1.73984	0.47362	0.370411	-0.00356413	0.348588	0.97007	1.32416	0.0601567
C1_11620W	CAALFM_C111620WA	0.873411	0.348562	1.08705	-0.467402	0.709995	-0.414177	0.799174	0.29093	-0.608633
C1_11630C	FUS1	0.948484	1.53537	1.45204	1.13734	0.706428	0.749889	1.08651	2.19981	0.352393
C1_11640C	DPP2	-0.225607	-0.668854	-0.113638	-0.607537	0.00602097	-0.413173	-0.143689	-0.400166	-0.355533
C1_11650W	EGD1	-1.00766	-1.37255	-1.35834	-0.777647	-0.625057	-0.715799	-0.815525	-0.851906	-0.343686
C1_11660W	GAD1	1.34326	0.392399	1.28657	0.478417	1.1693	0.859651	1.21165	0.645695	0.289217
C1_11670W	CAALFM_C111670WA	1.76654	0.561284	1.82252	0.325202	0.590761	0.470804	1.32828	0.836342	-0.19605
C1_11680C	CAALFM_C111680CA	-0.348126	0.370626	-0.123338	-0.117551	-0.29479	-0.292521	-0.506711	-0.169626	-0.29282
C1_11690W	CAALFM_C111690WA	0.331315	0.756994	1.05078	-0.0819018	0.0746358	-0.198464	0.574968	0.900824	-0.0259839
C1_11700C	MRF1	1.85393	0.826693	1.03265	0.163257	0.720322	0.509434	0.908336	-0.0650075	-0.467264
C1_11710C	CAALFM_C111710CA	-0.44657	-1.11362	-2.64539	-1.01587	-2.01261	-1.54019	-1.19367	-1.80256	-0.810414
C1_11720W	CAALFM_C111720WA	0.531585	1.02199	-0.262311	0.11794	-0.0327084	0.695702	0.325965	0.296594	0.516242
C1_11730W	CAALFM_C111730WA	0.36107	0.0466655	0.416839	-0.234355	0.395014	-0.111557	0.342832	-0.444111	-0.141149
C1_11740W	CAALFM_C111740WA	-0.230661	-0.403804	-0.129139	-0.0621265	-0.000342423	-0.0544384	-0.0685744	-0.103055	-0.0400366
C1_11750W	AVT4	0.165934	0.536923	0.431817	-0.115666	0.344757	-0.153811	0.141875	-0.0437871	-0.164834
C1_11760C	CAALFM_C111760CA	-0.793013	-0.947447	-1.02812	-0.914063	-0.822029	-0.846298	-0.550329	-0.625149	-0.410911
C1_11770C	CAALFM_C111770CA	0.231008	0.132713	-0.00360396	-0.0822133	0.0204054	-0.197042	0.165581	-0.215602	-0.1903
C1_11780W	CAALFM_C111780WA	-0.921543	-1.22447	-0.731277	-0.357566	-0.101921	-1.48414	-0.848257	-1.37119	-0.055803
C1_11790W	CAALFM_C111790WA	-0.29272	-0.062331	-0.617913	-0.00610658	-0.260172	0.0567465	-0.221119	0.102638	0.0453223
C1_11800C	CAALFM_C111800CA	-0.258794	-1.00462	-0.426778	-1.2316	-0.173033	-1.02889	-0.516897	-0.86522	-1.10426
C1_11810W	CAS1	-0.136606	-0.577826	-0.392016	-0.318229	-0.177862	-0.215886	-0.0522446	-0.0461945	0.0161697
C1_11850W	CAALFM_C111850WA	1.26053	-0.775315	1.92846	-1.64022	-0.949704	-1.48354	0.958388	-0.100441	0.157319
C1_11860W	CAALFM_C111860WA	-0.452581	-0.575072	-0.834691	0.03853	-0.279361	-0.0027286	-0.218102	-0.135898	0.00400636
C1_11870W	MUP1	-0.227301	1.27309	-1.06394	0.622013	-1.25214	0.338533	0.152523	0.738538	0.303793
C1_11880W	CAALFM_C111880WA	-1.2233	-1.4672	-1.64901	-0.984853	-0.92374	-1.02983	-1.12474	-1.18695	-0.516258
C1_11890W	CAALFM_C111890WA	1.05716	0.456021	1.87013	0.577265	0.886556	0.749202	1.43713	1.17939	-0.0648175
C1_11900C	CAALFM_C111900CA	-0.209178	0.0831609	-0.151526	0.170388	-0.124003	0.149008	-0.125417	0.05771	0.0607301
C1_11910W	CAALFM_C111910WA	0.134758	0.528699	-0.031616	0.351186	0.0612755	0.418438	0.163023	0.311185	0.190606
C1_11920W	CAALFM_C111920WA	0.102027	-0.382704	0.241213	-0.092275	0.189411	0.00850921	0.260228	-0.00502243	0.00368234
C1_11930W	CAALFM_C111930WA	-0.405929	-0.313607	-0.633049	-0.631464	-0.350517	0.0823583	-0.324081	-0.223245	-0.0462472
C1_11940C	CAALFM_C111940CA	0.206825	-0.137678	0.34186	-0.327208	0.152392	-0.237316	0.153359	-0.189747	-0.150407
C1_11950W	CAALFM_C111950WA	3.44139	2.06205	4.80907	1.67743	1.80501	-0.0328613	4.64956	4.26113	-0.48887
C1_11960C	CAALFM_C111960CA	0.169699	-0.10585	0.596678	0.0010391	0.397069	-0.327864	0.20891	-0.208704	-0.311038
C1_11970C	CAALFM_C111970CA	-0.259926	-0.211691	-0.464686	-0.328401	-0.11115	-0.0787034	-0.0476455	0.208908	0.253448
C1_11980W	MED10	-0.217503	-0.529399	-0.0539347	-0.340249	0.0760819	-0.293649	-0.000269832	-0.0961367	0.00951633
C1_11990W	CAALFM_C111990WA	-1.73434	-1.41971	-2.62656	-1.62335	-1.19915	-1.1755	-0.937349	0.0897581	-0.119282
C1_12000C	CAALFM_C112000CA	2.04075	1.32282	1.74731	1.67885	1.33789	1.15997	2.27662	2.26145	-0.0373246
C1_12010C	KIP4	2.37384	1.49887	2.38698	0.920004	2.05135	0.700398	2.03445	0.49193	0.252975
C1_12030W	SER33	-1.07411	0.959475	-1.19508	0.375697	-0.431269	0.556761	-0.858214	0.118497	0.205057
C1_12040W	CAALFM_C112040WA	0.838897	2.47155	2.09507	0.858923	1.17755	0.85054	1.42821	0.482399	-1.24863
C1_12050W	RPN2	-0.410848	-0.423261	-0.488345	-0.260624	-0.2994	-0.177736	-0.214758	-0.167299	-0.0394008
C1_12060C	CAALFM_C112060CA	0.26202	-0.844405	0.471407	-0.635116	0.0905024	-0.673871	0.164586	-0.578968	-0.724598
C1_12070C	CAALFM_C112070CA	0.594497	0.0337662	0.283422	0.275924	0.162166	0.226642	0.302942	0.413794	0.282426
C1_12080W	LCB4	0.402955	-0.834619	0.795425	-0.907102	0.0517427	-1.05871	0.262774	-0.278427	-0.571995
C1_12090C	CAALFM_C112090CA	0.432988	-0.361038	-0.973086	-0.136722	-0.226592	-0.0346578	0.707132	0.852553	-0.129566
C1_12100C	PXA2	0.352146	-0.00124335	1.17113	0.0661667	0.595992	0.155018	0.839893	0.62187	-0.121378
C1_12110C	CAALFM_C112110CA	0.0233095	0.188345	-0.129036	-0.338875	0.109042	-0.427979	0.0237675	-0.145004	-0.310993
C1_12120W	CAALFM_C112120WA	0.265124	0.435659	0.604184	0.179982	0.278215	0.359238	0.29067	0.316557	0.448713
C1_12130C	ZCF30	0.284356	1.01414	0.225648	0.654753	0.0898716	0.528105	0.513312	0.749472	0.45972
C1_12140W	CAALFM_C112140WA	2.27198	1.71769	3.12684	1.35714	1.71734	1.07869	2.55645	2.55803	-0.353554
C1_12150C	CAALFM_C112150CA	0.930766	-0.294564	1.74779	-0.186428	0.934603	-0.333725	0.868502	0.282888	-0.222675
C1_12160W	MSO1	1.24737	1.01677	1.55567	0.0565376	0.445701	-0.234764	1.17359	0.945215	0.453955
C1_12170C	CAALFM_C112170CA	0.0520729	0.0623162	0.251688	-0.0660069	0.126979	-0.0550834	0.132155	0.0200948	0.0483509
C1_12180C	CAALFM_C112180CA	0.0668422	-0.13504	0.113212	0.173195	0.37107	0.24556	0.0496277	-0.0253115	-0.119272
C1_12190W	BUL4	0.090288	0.281539	0.383497	0.623822	0.175775	0.380148	0.225553	0.262009	0.372798
C1_12200W	MCD4	0.118328	-0.0610468	-0.109906	-0.128439	0.152214	-0.00723711	0.104804	-0.0751195	-0.195584
C1_12210W	TRP3	-0.589858	-0.36472	-0.594243	-0.288095	-0.283259	-0.249287	-0.560182	-0.565148	-0.24491
C1_12220W	CDC6	-0.629877	-1.25369	-0.829044	-1.55094	-0.798593	-1.38213	-0.773156	-0.583753	-0.501203
C1_12230W	SNT1	-0.0642764	-0.152686	-0.0966972	-0.206906	-0.173576	-0.209802	-0.135149	-0.123576	0.0308254
C1_12240C	CAALFM_C112240CA	0.00618252	-0.54871	-0.163967	0.0539384	0.149132	0.256685	0.214096	0.159631	-0.0632354
C1_12250C	CAALFM_C112250CA	0.172999	0.135426	0.32412	-0.104884	0.301912	0.0465505	0.113456	-0.183199	-0.150641
C1_12260W	VPH2	0.515052	0.0469538	0.235042	0.0892583	0.422729	0.35901	0.371201	0.117365	0.231825
C1_12270W	SRT1	0.302255	-0.325463	0.546672	-0.184219	0.470293	-0.196706	0.457308	-0.310454	-0.304198
C1_12280C	CAALFM_C112280CA	-1.11561	-1.82783	-2.35907	-1.68045	-0.957175	-1.30024	-1.26152	-1.51589	-0.887508
C1_12290C	RBD1	-0.222635	-0.148631	-0.192088	-0.239771	-0.273453	-0.374446	-0.227425	-0.32259	-0.196059
C1_12310C	CSI2	-0.94848	-0.421285	-1.83671	-0.562011	-1.05127	-0.368964	-0.990097	-0.593947	-0.314251
C1_12320C	ATP19	-0.641774	-0.857971	-0.67175	-0.37469	-0.684666	-0.514497	-0.478566	-0.166877	0.0530867
C1_12330W	CAALFM_C112330WA	-0.845611	-0.788819	-1.08747	-1.01554	-1.40218	-0.811647	0.575035	-0.110976	-0.307381
C1_12340C	MRPS9	-1.05366	-1.26374	-1.69639	-0.873514	-0.788743	-0.789119	-0.949226	-0.834677	-0.49531
C1_12350W	CAALFM_C112350WA	-0.548956	0.434831	-1.4037	0.161703	-0.820173	0.361353	-0.394434	0.190585	0.33734
C1_12360C	RIB3	-0.256969	-0.745197	-0.539123	-0.412341	-0.318031	-0.319901	-0.23857	-0.22859	-0.0427015
C1_12370W	CAALFM_C112370WA	-0.196424	-0.119298	-0.45031	-0.313993	-0.0380899	-0.21688	-0.17938	-0.020531	-0.176774
C1_12380C	WRS1	-0.623439	-0.299918	-0.787616	-0.142008	-0.470351	-0.155459	-0.548806	-0.345794	-0.115552
C1_12390C	RPL27A	-0.825342	-0.897402	-1.1898	-0.549463	-0.550506	-0.464602	-0.798439	-0.664835	-0.142046
C1_12400C	CAALFM_C112400CA	0.255628	-0.342873	0.871663	-0.188539	0.409596	-0.2256	0.321267	-0.247704	-0.490068
C1_12410C	PKH2	0.486399	1.00515	0.685545	0.609859	0.333779	0.739701	0.54908	0.57047	0.394178
C1_12430W	CAALFM_C112430WA	0.330368	-0.0193062	0.495464	-0.0397777	0.341383	0.227203	0.310247	-0.0288085	0.0565313
C1_12440W	CAALFM_C112440WA	-0.492576	1.17897	-1.73535	0.908192	-1.2322	0.621079	-0.322118	0.459706	0.557626
C1_12450C	IRA2	0.0946192	0.360458	-0.319515	0.235155	0.052931	0.159146	0.165495	0.292658	0.155957
C1_12470W	CAALFM_C112470WA	1.15081	1.31713	0.560777	0.416051	-0.133966	-0.41316	0.91921	0.135287	-0.451354
C1_12480W	CAALFM_C112480WA	-0.397499	-0.251668	-0.839799	-0.34321	-0.504701	-0.191317	-0.644773	-0.619484	-0.484105
C1_12490W	PEP1	0.0272714	0.19979	0.0967966	0.211109	0.344815	0.195453	0.0547317	-0.0144762	-0.115378
C1_12510W	RAX2	0.663491	0.202449	0.751042	0.307739	0.664304	0.228068	0.491901	-0.210684	-0.0499299
C1_12520W	GSG1	-0.191225	-0.516315	-0.108667	-0.681139	-0.0969717	-0.403173	-0.0321495	-0.243405	-0.372465
C1_12530C	CAALFM_C112530CA	0.580727	0.178117	0.829884	0.0190159	0.573506	0.0616093	0.548952	0.291428	-0.135123
C1_12540W	CAALFM_C112540WA	-0.857331	-1.19558	-1.27737	-0.943504	-0.725657	-0.944593	-0.945914	-0.988064	-0.61431
C1_12550C	CDC54	-0.0958326	-0.177311	0.0528115	-0.577836	-0.226805	-0.497854	-0.0895632	-0.249684	-0.0729871
C1_12560C	DLH1	0.248115	0.620813	0.624845	-0.030364	0.335672	-0.58927	1.51026	1.0235	-1.45507
C1_12570C	CAALFM_C112570CA	-0.245794	0.476729	-0.845374	0.172486	-0.524529	0.266715	-0.17399	0.110879	0.0573511
C1_12580W	CAALFM_C112580WA	0.183862	0.090061	0.0273965	-0.0413856	-0.136212	-0.153579	0.11997	0.208997	-0.00813951
C1_12590W	ATP20	-0.385996	-0.672956	-0.438649	-0.48085	-0.255771	-0.492547	-0.230557	-0.37426	-0.371894
C1_12600C	CHR1	-0.547251	0.637227	-1.40625	0.482806	-0.711065	0.485462	-0.422866	0.28787	0.256693
C1_12610W	CAALFM_C112610WA	-0.855007	-1.01596	-1.48058	-0.515792	-0.792858	-0.541321	-0.775504	-0.579476	-0.167211
C1_12620W	SPA2	-0.338076	0.250127	-0.895336	0.148023	-0.331679	0.482376	-0.201292	0.243598	0.36726
C1_12630C	CAALFM_C112630CA	-0.451321	0.39637	-0.583239	0.215581	-0.433946	0.257037	-0.252213	0.0425129	0.00863123
C1_12640W	CAALFM_C112640WA	-0.33187	-0.780941	-0.315938	-0.889102	-0.186502	-0.866817	-0.47012	-0.883927	-0.659414
C1_12650C	CAALFM_C112650CA	0.118671	-0.338198	0.166203	-0.207815	-0.00509879	-0.372755	0.146866	-0.355	-0.505884
C1_12660W	CAALFM_C112660WA	0.188257	-0.118102	-0.0022307	-0.0704816	0.119526	0.143491	0.171506	0.149037	0.0930091
C1_12670C	CAALFM_C112670CA	-0.130409	0.544986	-0.496577	0.457929	-0.403865	0.459657	0.142558	0.510975	0.383998
C1_12680W	CAALFM_C112680WA	-0.641723	0.213972	-1.32244	0.128131	-0.663672	0.202545	-0.576023	0.145141	0.149152
C1_12690C	CAALFM_C112690CA	-0.179455	-0.635477	-0.126378	-0.559943	-0.0156509	-0.270615	-0.167711	-0.483501	-0.518092
C1_12700W	CAALFM_C112700WA	1.11604	0.421102	1.31711	0.352869	0.744262	0.379539	1.15586	0.461082	-0.11059
C1_12710C	CAALFM_C112710CA	0.468285	0.661997	0.678376	0.515995	0.350199	0.31061	0.429445	0.760967	0.282315
C1_12720C	CAALFM_C112720CA	1.89562	1.51462	1.21507	1.83405	0.463484	1.34671	1.06816	1.34812	0.5091
C1_12730W	RVS162	0.710639	0.0987635	0.76531	-0.0227111	0.241411	0.223416	0.844855	0.515116	-0.0920775
C1_12740W	CAALFM_C112740WA	0.197213	-0.0484873	0.258553	-0.184367	-0.0257632	-0.124707	0.168505	0.0961065	0.0160123
C1_12750C	CAALFM_C112750CA	-0.202779	0.360562	-0.688905	0.200066	-0.382566	0.406041	-0.115201	0.20331	0.0628244
C1_12760W	CAALFM_C112760WA	-0.854672	-0.637262	-1.64445	-0.410113	-0.85055	-0.315956	-0.885691	-0.48519	-0.194423
C1_12770W	RPG1A	-0.73731	-0.285532	-1.3833	-0.242796	-0.712179	-0.045936	-0.607963	-0.3168	0.119237
C1_12780W	RBK1	0.240686	0.109606	0.329016	0.289592	0.307317	0.433277	0.684941	0.877495	-0.000890322
C1_12790C	FEN1	-0.26182	-0.445338	-0.156146	-0.30926	-0.218298	-0.423694	-0.0562621	-0.119498	-0.458524
C1_12800W	CAALFM_C112800WA	0.517748	0.623019	0.232459	0.819148	0.395074	0.823036	0.551439	1.01786	0.07357
C1_12810W	CAALFM_C112810WA	-0.00414641	-0.243927	0.0465814	-0.217153	0.0348189	-0.289986	0.0251085	-0.0727851	-0.365325
C1_12820C	CAALFM_C112820CA	-0.88701	-1.313	-1.55114	-1.26775	-0.712208	-1.20187	-1.02808	-1.42592	-1.01311
C1_12830C	CAALFM_C112830CA	0.2545	-0.151386	0.171565	-0.125139	-0.0908734	-0.0123914	0.324485	0.318789	0.068319
C1_12840W	CAALFM_C112840WA	0.420786	-0.316641	0.542107	-0.796651	0.257714	-0.648547	0.359769	-0.530259	-0.653056
C1_12850W	BLP1	8.04499	-0.853556	7.26784	-1.61063	-0.0241463	-1.5112	7.33406	4.69321	-1.31118
C1_12860C	CAALFM_C112860CA	0.384582	0.0891979	0.645811	-0.0110769	0.648469	-0.00911303	0.411678	-0.0167848	-0.239475
C1_12870C	CAALFM_C112870CA	0.490344	0.510722	0.754244	0.428854	0.600085	0.421132	0.518209	0.346445	0.318676
C1_12880C	CAALFM_C112880CA	1.52538	0.846967	2.21206	0.676892	0.982839	0.514138	1.77505	1.38658	0.157947
C1_12900W	CAALFM_C112900WA	0.261576	-0.101809	0.285256	-0.19936	0.435689	-0.0784469	0.229208	-0.111275	-0.301298
C1_12910W	CAALFM_C112910WA	-1.47063	-0.880309	-1.84055	-1.17834	-1.1173	-1.44672	-2.34467	-5.02571	-0.400878
C1_12920C	CAALFM_C112920CA	-0.192442	-0.134707	-0.0459611	-0.263651	0.055209	-0.434741	-0.17978	-0.415921	-0.332369
C1_12930C	CAALFM_C112930CA	0.829015	1.08793	1.3728	0.525941	0.550274	0.474387	0.919865	0.748138	0.123326
C1_12940C	CAALFM_C112940CA	0.27338	0.567916	0.401749	-0.225137	-0.680714	-0.365847	-0.0994581	0.327223	-0.40776
C1_12950W	CAALFM_C112950WA	0.273455	0.639156	0.344504	0.388173	0.190379	0.362183	0.228017	0.44365	0.193335
C1_12960C	BNI1	0.703417	0.255566	0.726974	0.0644354	0.724632	0.130835	0.672092	-0.0426112	-0.186082
C1_12970C	SEC2	0.0357383	0.0775559	0.122803	-0.00541664	-0.0951675	0.0367578	0.187274	0.219997	0.0933229
C1_12990W	CAALFM_C112990WA	-0.911587	-2.27291	-1.02551	-1.7956	-1.14452	-1.9247	-0.583357	-2.81688	-1.98243
C1_13010W	CAALFM_C113010WA	-0.770664	-0.236895	-1.44914	-0.165618	-0.80061	-0.255396	-0.544026	-0.14567	0.0893448
C1_13020C	SPC3	0.648122	0.187102	0.770374	0.240877	0.639094	-0.127341	0.650065	0.0786948	-0.217053
C1_13030C	CAALFM_C113030CA	-0.617696	-0.393762	-0.772459	-0.131128	-0.322923	-0.106548	-0.490855	-0.308728	-0.0805392
C1_13040C	CAALFM_C113040CA	-0.484277	-1.15951	0.195375	-0.960328	-0.236821	-1.08438	-0.41484	-1.17209	-2.22092
C1_13050W	RPL14	-0.745666	-0.529789	-1.2234	-0.135733	-0.566445	-0.122785	-0.618936	-0.294384	0.308175
C1_13060C	CAALFM_C113060CA	-1.26107	-1.3246	-2.13702	-0.755184	-1.23502	-0.743295	-0.999307	-0.569125	-0.177632
C1_13070C	FAD3	-1.08297	0.431737	-2.55579	-0.18244	-1.37836	-0.205136	-0.807222	0.220418	-0.112269
C1_13080W	OP4	6.00859	0.957353	11.0368	1.34525	0.882701	-0.673092	6.16312	7.15605	0.961148
C1_13100W	CAALFM_C113100WA	7.91442	8.99903	8.46554	8.45498	5.28232	6.67119	7.46547	6.29794	4.23791
C1_13110C	CHS3	0.172293	0.41888	-0.240501	0.284907	-0.0182196	0.217556	0.13657	0.089198	0.229733
C1_13120C	MON2	0.102227	-0.175458	-0.140529	0.0465387	0.0748772	0.179657	0.194594	0.144449	0.1161
C1_13130C	CAALFM_C113130CA	-0.534439	-1.00781	-0.569886	0.255318	-1.06061	-0.305222	-0.374729	0.259484	0.126869
C1_13140C	TYE7	2.26605	1.37644	-0.0110094	1.72134	0.0619773	1.17791	1.95352	1.13868	2.60525
C1_13160W	PSA2	3.70709	2.84812	3.32942	1.83118	1.73645	1.30541	2.84647	2.14348	0.374537
C1_13170C	MSH6	0.0953879	-0.177055	0.12549	-0.201612	0.0923344	-0.0518286	0.131673	0.00482592	-0.0930195
C1_13180W	CAALFM_C113180WA	1.56718	0.516688	1.7053	0.357529	0.843217	0.488805	1.82242	0.879418	-0.513297
C1_13190W	CAALFM_C113190WA	1.23854	-0.704596	0.642981	-0.20108	-0.09631	-0.338598	0.923299	0.321786	-0.145556
C1_13200C	REX3	-0.235967	0.154834	-0.742603	0.439741	-0.444251	0.296717	-0.14528	0.195069	0.265028
C1_13220C	AKR1	0.43773	0.623422	0.10027	0.728337	0.16757	0.51748	0.571396	0.477861	0.503393
C1_13240W	CAALFM_C113240WA	0.601551	1.21968	0.901188	1.22524	0.192949	0.666811	0.894521	0.00635895	0.295884
C1_13250W	CAALFM_C113250WA	-0.406236	0.0615981	-0.520444	0.01876	-0.673187	-0.0844167	-0.0714741	-0.184999	0.377861
C1_13260W	CAALFM_C113260WA	-0.613777	-0.474384	-0.989878	-0.639801	-0.387907	-0.498139	-0.355769	-0.40534	-0.395889
C1_13270W	CAALFM_C113270WA	0.573583	1.10461	1.04019	0.943845	0.882396	1.18496	0.655772	0.878095	0.0660714
C1_13280C	CAALFM_C113280CA	-0.0941576	-0.442256	0.0591995	-0.287236	-0.0229613	-0.410691	-0.109872	-0.197529	-0.333429
C1_13290W	CAALFM_C113290WA	-0.522653	-1.81801	-1.75623	-0.774398	-1.01158	-0.97456	-0.417662	-0.367082	-1.01846
C1_13300C	RPN1	-0.2408	-0.0556676	-0.332265	0.0800603	-0.398745	0.0887126	-0.0626597	0.105985	0.194532
C1_13310W	ECM25	0.134476	-0.317957	0.21817	-0.126083	0.322245	-0.165334	0.0686098	-0.292783	-0.370851
C1_13320C	CAALFM_C113320CA	-0.30319	-0.374784	-0.503775	-0.223647	-0.450039	-0.29712	-0.0776793	0.061375	0.290856
C1_13330C	CAALFM_C113330CA	-0.23062	0.160209	-0.316154	0.132355	0.0234702	0.202673	-0.0840384	-0.231033	-0.0654084
C1_13350W	STP2	0.0644459	0.0938479	-0.174759	-0.177713	-0.531666	-0.155056	0.23252	0.288554	0.240972
C1_13360C	RMP1	-0.155937	0.597107	-0.790122	0.373931	-0.430375	0.401337	-0.188651	0.190925	0.0554638
C1_13370W	CAALFM_C113370WA	-0.672947	-0.403347	-1.40934	-0.546028	-0.751234	-0.418669	-0.764189	-0.654498	-0.505029
C1_13380W	CAALFM_C113380WA	-0.126051	0.293799	-0.689923	0.120886	-0.202707	0.0806564	0.0530499	0.0325993	-0.233178
C1_13390W	CAALFM_C113390WA	0.192061	0.950881	0.114672	0.704495	-0.0389985	0.804033	0.27087	0.801239	0.446873
C1_13400C	AGC1	-0.336539	-0.0492521	-0.351402	-0.122702	-0.328595	-0.224886	0.138902	0.467763	-0.0652247
C1_13410W	COX19	-0.291736	-0.576646	-0.628248	-0.404282	-0.587971	-0.487397	-0.158592	-0.291558	-0.161859
C1_13420C	KEM1	-0.347818	-0.306441	-0.534196	-0.072312	-0.302019	0.0235151	-0.0909593	0.0220836	0.0530391
C1_13430C	CAALFM_C113430CA	4.60329	5.47413	6.61232	3.47473	4.07407	3.1407	4.27024	3.83183	0.956573
C1_13440C	OFI1	6.73045	3.85919	6.41572	1.72208	0.402347	0.494818	6.17611	3.66567	-1.19799
C1_13450W	HYR1	8.23009	4.82781	7.66302	3.55247	2.64466	2.08862	7.45422	2.1802	0.540318
C1_13470W	KNS1	3.04262	2.67264	3.51449	2.39009	2.27003	1.8962	3.0224	2.62857	0.261081
C1_13480W	HSP70	5.47496	3.1434	5.64946	2.96751	4.32945	2.72572	5.67807	4.04885	-0.378587
C1_13490C	CAALFM_C113490CA	0.745207	1.02668	0.537389	0.846505	0.60159	0.853532	0.731909	0.827797	0.466507
C1_13500C	CAALFM_C113500CA	-0.102452	-1.20593	0.063135	-0.944092	-0.294277	-1.63981	-0.950365	-2.26509	-0.796386
C1_13510C	TGL99	0.825091	0.237698	0.596308	0.397252	0.656169	0.268255	0.627753	0.319781	-0.116528
C1_13520C	MCU1	-0.524553	-0.29738	-1.04885	-0.147461	-0.670008	-0.232733	-0.51346	-0.177397	-0.0880266
C1_13530W	CAALFM_C113530WA	0.496379	0.542693	0.287502	0.391815	0.244594	0.462621	0.533817	0.648611	0.313286
C1_13540W	GUP1	0.480948	0.135551	0.297912	0.0453485	0.332426	0.0473437	0.424913	0.312462	-0.25827
C1_13550C	NUP49	-0.364357	0.0295655	-0.863036	-0.0306695	-0.57664	0.0937984	-0.3896	0.0510835	0.106015
C1_13560W	CAALFM_C113560WA	0.353857	0.479069	0.391472	0.495924	0.291745	0.524933	0.409736	0.347947	0.238683
C1_13570W	MPT5	0.729619	0.436805	0.484767	0.581811	0.491608	0.497744	0.67817	0.517828	0.255445
C1_13580W	SEC18	0.383132	0.11448	0.304334	0.231939	0.444672	0.289886	0.59473	0.323026	-0.0182476
C1_13590W	CAALFM_C113590WA	1.21104	1.28284	0.595966	1.15354	0.5155	1.38271	0.881808	1.26755	0.43984
C1_13600W	CAALFM_C113600WA	0.545308	0.476104	0.828656	0.511035	0.0462435	0.267557	0.811637	0.636328	0.0218764
C1_13610C	KIS2	0.714135	-0.145324	1.0922	-0.2313	0.765094	-0.0795516	0.80719	0.373099	-0.348656
C1_13620W	ROB1	1.65111	1.77509	1.57035	1.74167	0.756517	1.07029	2.00977	2.34979	0.757465
C1_13630W	CYB2	1.82442	1.1213	3.50273	1.10013	0.0969332	0.826763	2.25969	2.45548	0.166146
C1_13640W	CUP2	-0.242343	0.287114	-0.335644	0.302883	-0.283871	0.277989	-0.197173	0.416727	0.426566
C1_13650C	CAALFM_C113650CA	0.0911799	-0.098495	0.0255856	-0.279065	0.0686385	-0.249117	0.0858622	-0.256226	-0.268978
C1_13660W	RAD54	-0.0331446	-0.0330258	-0.129042	-0.0290666	-0.160851	-0.265472	-0.0388425	-0.0695658	-0.10379
C1_13670W	OSM2	2.26925	0.846904	3.48098	0.672431	-0.493687	-0.628813	2.77967	2.63926	-0.16004
C1_13680C	GCV3	-0.243104	-1.12078	-0.087763	-0.419669	-0.00635728	-0.318716	-0.235079	-0.236021	-0.384006
C1_13690C	CAALFM_C113690CA	-0.063011	0.0883021	0.099341	0.121988	-0.0844358	0.0356773	0.00545855	-0.0314822	0.079453
C1_13700W	ACT1	-0.12906	-0.0646437	-0.317278	0.0550555	-0.00699521	0.0671584	-0.0424791	-0.161608	0.000669672
C1_13710C	DAD1	-0.486107	-1.3003	-0.474875	-1.1233	0.0763358	-1.02501	-0.438768	-0.819301	-0.976072
C1_13720W	CAALFM_C113720WA	-0.619302	-0.291296	-0.797949	-0.100826	-0.285317	0.140667	-0.618556	-0.301908	-0.0268035
C1_13730C	DIM1	-0.879336	0.27702	-1.74312	0.200417	-1.03887	0.188518	-0.904872	-0.101209	0.215098
C1_13740W	KAR9	0.488385	0.34262	0.759041	-0.0380921	0.601368	0.194526	0.206581	0.180168	-0.229336
C1_13750C	CAALFM_C113750CA	-0.444254	-0.415109	-0.386407	-0.494017	-0.610846	-0.238406	-0.350258	-0.249906	0.0596221
C1_13760W	AGM1	0.392005	0.120258	0.34337	0.103807	0.369851	0.407976	0.448236	0.106146	-0.0514798
C1_13770C	CAALFM_C113770CA	-0.19076	-0.618746	-0.492888	-0.3874	-0.231873	-0.28903	-0.128834	-0.359815	-0.296229
C1_13780W	MYO2	0.039329	-0.0881578	-0.239917	0.256264	0.0379005	0.214638	-0.0274465	-0.339642	-0.0144443
C1_13790C	CAALFM_C113790CA	-0.306054	-0.149389	-0.345239	-0.0168192	-0.32487	-0.0281399	-0.160046	-0.0204122	-0.070016
C1_13800C	DUR32	0.654898	0.917925	0.81864	0.948178	0.807514	0.878412	0.724386	0.709792	0.469021
C1_13810W	CAALFM_C113810WA	1.11907	1.07282	1.15659	0.121132	0.704346	0.532297	0.929578	0.471364	0.168435
C1_13820C	CAALFM_C113820CA	-0.533781	0.399518	-1.09564	-0.0546485	-0.743036	-0.0929044	-0.49836	-0.0152335	-0.203888
C1_13830C	PDX1	-0.478139	0.586997	0.0502442	0.543694	-0.0156756	0.0467713	-0.484452	-0.184683	-0.145318
C1_13840W	CAALFM_C113840WA	0.902038	1.07029	1.22743	0.64146	1.00385	0.308831	0.924297	1.10392	0.479055
C1_13850C	DAL7	2.06955	2.86692	2.70856	1.17884	0.869033	0.93296	2.12929	1.77975	-0.536968
C1_13860C	GND1	-0.586994	0.183911	-0.431371	0.128009	-0.110614	-0.0722604	-0.646632	-0.723128	-0.225456
C1_13870W	MET3	2.31567	4.36396	-0.407369	1.65494	-1.54103	1.23519	3.26379	4.12105	1.07627
C1_13880C	CAALFM_C113880CA	-0.122938	-0.442884	0.475795	-0.415459	-0.185008	-0.281345	0.111804	-0.0245594	-0.0118002
C1_13900C	LCB2	-0.0739887	0.101253	-0.17972	0.124495	-0.0607294	0.0199575	-0.108469	-0.0202566	0.145156
C1_13910C	MODF	0.358462	0.0804559	0.523847	0.359005	0.15708	0.0758571	0.592246	0.526997	0.204867
C1_13920W	DOS2	0.723812	0.240389	0.910946	0.348843	0.728841	0.369008	0.813378	0.380793	0.0399152
C1_13930W	SSK1	0.0835744	0.719462	-0.129801	0.222696	-0.323356	-0.0238691	0.105479	0.300779	0.291793
C1_13940W	SIM1	-1.44568	-0.421628	-2.40711	0.00198199	-1.43997	-0.189744	-0.995604	-0.316748	0.135699
C1_13950C	CAALFM_C113950CA	1.32604	0.960195	2.08996	0.697137	1.76851	0.714312	1.32229	1.14582	-0.551471
C1_13960W	YBP1	-0.000877455	-0.130862	0.246925	0.110185	0.222239	0.0999022	0.0389364	-0.021174	-0.026969
C1_13970C	HPC2	-0.188819	-0.111522	-0.0917557	-0.462547	-0.179461	-0.432006	-0.152797	-0.0542942	-0.225913
C1_13980C	DUR7	0.23688	0.540136	0.339683	0.536724	0.0386863	0.411192	0.377206	0.52556	0.319202
C1_13990W	OCA6	0.185708	-0.229213	0.4181	-0.189387	0.134538	-0.0444157	0.193805	0.162234	0.0927834
C1_14000C	DOA4	0.580821	0.788771	0.552061	0.133408	0.348144	0.194384	0.436639	0.395582	0.127684
C1_14010W	CSK1	0.929131	1.05655	-1.35236	1.07568	-0.547716	1.15201	0.147107	0.434291	0.159971
C1_14020W	CAALFM_C114020WA	2.62332	2.27269	2.83821	2.16248	1.13367	1.46027	2.37307	2.40902	0.174039
C1_14030W	CAALFM_C114030WA	1.64668	1.99762	2.2018	1.44503	1.67514	1.38762	1.64964	1.22331	0.193137
C1_14040W	CAALFM_C114040WA	0.333156	-0.0856557	0.622194	-0.000370592	0.428669	0.103383	0.307718	0.0167999	0.121824
C1_14050C	CAALFM_C114050CA	0.448317	0.882746	0.533429	0.500465	0.10985	0.320784	0.461481	0.415719	0.0904027
C1_14060W	CAALFM_C114060WA	1.74071	2.26801	2.50791	1.22014	1.80805	1.56312	1.54846	0.389298	0.0965559
C1_14080W	CAALFM_C114080WA	-0.671837	0.109806	-1.11388	0.108734	-0.607713	0.0841366	-0.522965	0.072793	0.263834
C1_14090W	CAALFM_C114090WA	-0.0484556	-1.01038	0.00400483	-0.221402	-0.0543233	-0.421102	0.195263	-0.219876	-0.154868
C1_14100W	YPT52	0.20244	0.0498278	0.558104	-0.178195	0.240668	-0.175871	0.301981	-0.175457	-0.145571
C1_14110C	RPL4B	-1.04086	-1.0423	-1.7755	-1.00111	-0.715744	-0.896217	-1.0438	-1.13579	-0.426522
C1_14120C	RBE1	-1.61412	-1.28902	-3.39029	-1.11137	-1.75121	-1.35954	-0.464005	1.02023	-0.840417
C1_14130W	FTR1	0.668247	3.54385	2.43995	2.03205	3.1552	2.52603	1.07321	1.53503	-0.567577
C1_14140C	SET3	0.426607	-0.24441	0.212132	-0.243422	0.0417412	-0.301616	0.109309	-0.171911	-0.199893
C1_14150C	PAM16	-0.84084	-0.721936	-1.08051	-0.449819	-0.759239	-0.667572	-0.623178	-0.684739	-0.0798616
C1_14160W	CAALFM_C114160WA	-0.788028	-0.0172031	-1.31487	0.309421	-0.609497	0.24629	-0.662467	0.0704398	0.178442
C1_14170W	CAALFM_C114170WA	-0.0385138	-0.133911	0.401819	-0.0620393	0.281353	-0.0910253	0.0484741	-0.209822	-0.152668
C1_14180W	CAALFM_C114180WA	2.30646	2.96129	2.39752	1.62725	1.61538	1.78714	2.21039	1.94574	0.433314
C1_14190C	CAALFM_C114190CA	3.40433	2.07945	3.68051	1.75977	2.19357	1.42364	2.84413	1.35968	0.851498
C1_14200W	CAALFM_C114200WA	0.43322	0.293305	0.629439	0.0703986	0.411396	-0.00828456	0.473107	0.568369	0.0677929
C1_14210C	IML2	0.378185	0.16385	0.369537	0.186871	0.303019	0.0947975	0.50749	0.292497	0.273748
C1_14220C	FTR2	-1.58167	-1.6883	-2.74075	-2.00572	-1.48583	-1.39244	-1.71949	-2.15158	-0.52159
C1_14230C	IRR1	0.128549	-0.286899	0.171439	-0.119467	-0.0735086	-0.255131	0.137828	0.0374359	-0.15647
C1_14240W	CAALFM_C114240WA	-0.30075	-0.346098	-0.35452	-0.0844451	-0.183962	-0.0488718	-0.14076	-0.0122533	0.066337
C1_14250C	CAALFM_C114250CA	0.0487906	-0.148379	-0.0247331	-0.224703	-0.208806	-0.323321	-0.00714905	-0.233184	-0.222852
C1_14260C	TIF35	-0.859005	-0.684419	-1.27698	-0.627947	-0.580095	-0.547397	-0.786007	-0.802719	-0.343769
C1_14270W	CAALFM_C114270WA	-0.165882	-0.0828059	-0.0467975	0.364666	-0.0188274	0.199308	-0.237211	-0.0109285	0.180973
C1_14280C	NPL3	-1.04367	-0.361246	-2.05774	-0.133987	-1.13706	-0.19786	-0.977121	-0.314153	0.275426
C1_14290C	MDG1	0.439932	0.362407	0.375731	-0.0487456	0.271393	0.232137	0.409776	0.0358152	-0.116236
C1_14300C	NCR1	1.18125	0.578621	1.64471	0.314338	0.952072	0.3916	1.07677	0.457028	-0.178638
C1_14310W	CAALFM_C114310WA	-0.306074	-0.795835	-0.646928	-0.662748	-0.188481	-0.496991	-0.374572	-0.530701	-0.117457
C1_14320C	CAALFM_C114320CA	-0.839277	-0.735485	-0.344211	-0.780342	-0.276631	-0.820148	-0.58961	-0.702321	-0.416116
C1_14330W	CAALFM_C114330WA	-0.834495	-0.487187	-1.51079	-0.516881	-0.786473	-0.613833	-0.782984	-0.612475	-0.210078
C1_14340C	RIM101	0.531141	1.00361	0.603176	0.536028	0.242818	0.993786	0.859632	0.146633	0.562154
C1_14350W	CAALFM_C114350WA	0.0807791	-0.351448	0.0315779	-0.432713	-0.136072	-0.392708	0.0341307	-0.403908	-0.0751694
C1_14360C	WSC4	0.670241	0.792317	0.624097	0.113797	0.488064	0.224777	0.387686	0.0619179	-0.132807
C1_14380C	CAALFM_C114380CA	-0.478271	0.0473422	-0.64698	-0.0425798	-0.377632	-0.099965	-0.449153	-0.21691	-0.0498618
C1_14390W	RPC10	-0.411557	0.0405595	-0.402694	-0.160302	-0.126594	-0.196451	-0.368369	-0.306239	-0.0306401
C1_14400C	MLH3	-0.372915	-0.44575	-0.50187	-0.660134	-0.330214	-0.598348	-0.422226	-0.774745	-0.382702
C1_14410W	CAALFM_C114410WA	-0.142909	-0.3657	-0.3552	-0.0811821	0.0885963	-0.0557009	-0.208197	-0.256425	0.0134671
C1_14420W	DDI1	0.0619692	-0.239277	-0.0592338	-0.271894	0.17341	-0.100479	0.11378	-0.236623	-0.109067
C1_14430C	CAALFM_C114430CA	-0.0568845	-0.463572	-0.211348	-0.627835	0.136271	-0.58993	-0.338724	-1.04444	-0.546792
C1_14440C	GDI1	0.519844	0.0888032	0.553204	-0.274472	0.464094	-0.224472	0.426285	-0.473135	-0.550998
C1_14450C	CAALFM_C114450CA	-0.664619	-0.993502	-1.07969	-1.03063	-0.673602	-0.991516	-0.885499	-1.10506	-0.714077
C1_14460W	CAALFM_C114460WA	-0.00603701	-0.185108	0.0568782	-0.048496	0.159617	-0.0567922	0.100835	0.0924144	0.0144987
C1_14470W	CAALFM_C114470WA	-0.15157	-0.186263	-0.269376	-0.0928819	0.000366995	-0.0735648	-0.236302	-0.0550767	0.0706591
C1_14480W	CAALFM_C114480WA	-0.225417	-0.352387	-0.00309287	-0.350196	0.215796	-0.470701	-0.148806	-0.40023	-0.377164
C1_14490C	SAM35	-0.512268	-0.493444	-0.851049	-0.832959	-0.30514	-0.587883	-0.601235	-0.77113	-0.524596
C1_14500C	CAALFM_C114500CA	-0.345476	-0.567457	-0.295236	-0.563788	-0.245507	-0.620961	-0.270692	-0.555669	-0.445238
C1_14520W	CAALFM_C114520WA	-0.283782	-0.455067	-0.541641	-0.399048	-0.20438	-0.518872	-0.283708	-0.506528	-0.173681
C1_14530W	CAALFM_C114530WA	0.235054	0.130466	0.414747	0.0767317	0.290332	0.0483545	0.26177	-0.1925	-0.0899159
C1_14550C	CAALFM_C114550CA	0.504466	0.112575	0.831866	-0.022961	0.30048	0.0173737	0.394445	0.370088	0.0597937
C1_14560C	CAALFM_C114560CA	-0.0858586	0.142792	-0.53264	-0.213757	-0.327117	-0.0636089	-0.0548167	0.0330623	0.205166
C1_14570C	FGR24	-0.0230568	-0.0300836	-0.0951939	-0.339894	0.0696474	-0.204678	0.160693	-0.26881	-0.0508109
C1_14580C	CAALFM_C114580CA	0.172009	-0.517024	0.218271	-0.803573	0.221949	-0.748811	0.141926	-0.802915	-0.714039
C1_14590C	TLO4	1.02142	0.505206	1.43109	0.393821	1.13098	0.159136	0.805874	-0.244518	-0.429683
C1_14630C	CAALFM_C114630CA	1.22336	0.395263	3.23e-05	0.389323	-0.0876666	0.197761	0.62059	0.621791	0.0192459
C2_00010W	TLO5	1.07644	0.882237	1.99364	0.931721	1.7351	0.684933	0.709837	-0.324639	-0.534305
C2_00030W	RRN3	-0.772639	-0.46227	-1.09845	-0.75489	-0.511989	-0.729351	-0.822943	-0.915244	-0.53653
C2_00060C	CAALFM_C200060CA	-0.192539	-0.349582	-0.395104	-0.416679	0.218795	-0.250811	-0.0666831	-0.647783	-0.406472
C2_00070C	MPP10	-0.605424	0.0480508	-1.08124	0.159861	-0.526557	0.123091	-0.506845	0.0659411	0.197907
C2_00080C	FAV3	0.145727	0.539645	-0.00663493	0.477098	-0.0441917	0.347108	0.281445	0.25664	0.131468
C2_00090W	CAALFM_C200090WA	-0.362045	-0.65257	-0.932187	-0.36533	-0.341803	-0.295588	-0.442056	-0.358961	-0.166671
C2_00100C	PGA52	-0.194538	0.110282	-0.260924	-0.0401462	0.13574	-0.172496	-0.301403	-0.778717	-0.0890696
C2_00110W	CAALFM_C200110WA	-0.517969	-0.00307176	-0.762625	-0.0504321	-0.606698	-0.191102	-0.475519	-0.412361	-0.0647599
C2_00120C	EMC9	0.0375633	0.000327191	-0.0499387	-0.267294	0.133892	-0.298421	-0.0230169	-0.245023	-0.243712
C2_00140W	NDT80	-0.584452	-0.0827764	-1.34593	-0.546224	-0.606737	-0.425332	-0.649574	-0.51739	-0.388995
C2_00150W	LEU5	-0.195374	-0.706869	-0.137647	-0.463868	-0.120795	-0.396974	-0.0902097	-0.0529921	-0.259663
C2_00160C	NAT2	-0.523745	-0.431422	-0.594919	-0.263708	-0.333239	-0.337036	-0.262684	-0.334798	-0.226695
C2_00170C	CAALFM_C200170CA	-0.735935	-0.342682	-1.16224	-0.172205	-0.501344	-0.239249	-0.636825	-0.384139	-0.138615
C2_00180C	CAALFM_C200180CA	0.660223	5.75322	2.10911	1.30017	1.05788	0.853235	1.06654	1.28187	-0.0643636
C2_00190C	CAALFM_C200190CA	-0.180827	-0.279656	-0.265536	-0.284298	-0.152333	-0.518913	-0.27051	-0.315933	-0.344707
C2_00200W	CAALFM_C200200WA	-0.211172	0.100042	0.0799843	0.0742913	-0.0271112	-0.0638407	-0.200083	-0.0737165	-0.118566
C2_00210W	RPL38	-0.608853	-0.657014	-0.833861	-0.217788	-0.423073	-0.154632	-0.585109	-0.29914	0.194481
C2_00220C	CAALFM_C200220CA	-0.242278	-0.187099	-0.154277	-0.188648	-0.315566	-0.253443	-0.215517	-0.18658	0.0276501
C2_00230W	CAALFM_C200230WA	0.0521814	-0.155393	0.201915	-0.00537135	0.188143	-0.136699	0.000328729	-0.473652	-0.0859699
C2_00240C	SOD6	0.879195	-0.981194	0.775566	-0.547009	0.403489	-0.945945	0.456673	-1.09188	-0.645229
C2_00250W	STF2	5.61386	-0.511467	4.10344	0.6872	-1.38142	-0.234067	4.72926	1.68636	1.16114
C2_00260C	MUQ1	-0.144297	-0.228705	-0.286488	-0.216537	-0.12881	-0.0717358	-0.356686	-0.669688	-0.0371139
C2_00270C	CAALFM_C200270CA	0.0296975	0.0305626	0.338021	-0.00549176	0.235188	-0.0859149	0.131774	-0.0922112	-0.259442
C2_00280C	CAALFM_C200280CA	-0.147986	0.55654	-0.451599	0.381678	-0.320023	0.420916	-0.193776	0.182725	0.274996
C2_00290W	CAALFM_C200290WA	-0.251942	-0.872855	-0.183721	-0.686404	-0.119148	-0.641826	-0.324931	-0.510535	-0.3804
C2_00300C	CKB1	-0.557786	-0.41856	-0.756808	-0.454786	-0.467273	-0.541165	-0.488088	-0.570744	-0.202183
C2_00310W	CAALFM_C200310WA	-0.486842	-0.134973	-0.726859	-0.165353	-0.446868	-0.201346	-0.361351	-0.248337	0.0999566
C2_00320W	CAALFM_C200320WA	0.0253888	-0.293833	0.106196	-0.171017	0.159895	-0.40905	0.00281196	-0.285242	-0.139521
C2_00330C	HIR1	0.286361	0.426518	0.500189	0.217852	0.311572	0.148997	0.346531	0.342905	0.22065
C2_00340C	ARO8	-0.535992	0.487936	0.132794	0.00769351	-0.0865426	-0.0502964	-0.390294	-0.307695	-0.0851959
C2_00350W	CAALFM_C200350WA	0.265108	0.627163	0.435221	0.195118	0.10365	0.276607	0.306256	0.534105	0.189337
C2_00360C	CAALFM_C200360CA	-0.508245	-0.478145	-0.688037	-0.115127	-0.771441	-0.249102	-0.528418	-0.3659	0.306489
C2_00370W	PDR6	-0.231899	-0.180253	-0.235099	0.0638163	-0.126743	0.105218	-0.0654299	0.0165058	0.213885
C2_00380C	RFA1	-0.387361	-0.363389	-0.390008	-0.122892	-0.360216	-0.113897	-0.300784	0.00284796	0.111624
C2_00390C	CAALFM_C200390CA	0.024785	1.23355	0.519632	0.19596	0.157429	0.15506	0.16553	0.374843	-0.0378833
C2_00400C	CAALFM_C200400CA	-0.854247	-1.52198	-1.77711	-0.593428	-1.15316	-0.662149	-0.651964	-0.349558	-0.184441
C2_00410C	CAALFM_C200410CA	-0.394485	0.566172	-1.07067	0.406985	-0.554363	0.419227	-0.235783	0.392686	0.34833
C2_00420W	CAALFM_C200420WA	0.592646	0.00848296	0.75778	0.164446	0.336098	0.0513228	0.616205	0.391813	0.00212886
C2_00430C	DPB4	-0.0695997	-0.42533	-0.0366617	-0.358866	-0.128808	-0.289101	0.0326461	-0.168737	-0.0472987
C2_00440W	SAS2	0.0879255	0.0578196	0.390596	0.05201	0.210223	-0.0703356	0.103895	0.203819	-0.095131
C2_00450C	CDH1	0.154503	0.237984	0.294456	-0.0870396	0.0888583	-0.116941	0.180586	0.334803	-0.0207131
C2_00460W	SAP30	0.754654	0.352739	0.775137	0.432515	0.107604	-0.32739	1.08223	0.928196	-0.118962
C2_00470W	POM152	0.037019	0.13474	-0.136036	0.103666	-0.0209256	0.0449928	0.0589655	0.117539	0.0376838
C2_00480C	PHHB	1.41168	-0.0421297	0.774762	0.0651584	0.162717	-0.290136	1.08808	0.436763	0.135457
C2_00490W	CAALFM_C200490WA	0.220519	-0.0842505	0.248687	0.137138	0.1746	-0.0114524	0.254808	0.168743	0.0984514
C2_00500W	ZCF9	0.309514	1.14407	0.625775	0.533405	0.215233	0.393211	0.297612	0.172552	0.162714
C2_00510W	CAALFM_C200510WA	2.24322	1.03768	2.69892	1.14128	1.51888	0.992316	2.0795	1.47979	0.0446842
C2_00520W	DFG5	0.0967602	0.237831	0.0250224	0.16186	0.134699	0.117909	0.0938287	-0.00611546	-0.00175079
C2_00540W	CAALFM_C200540WA	0.319759	0.637673	0.273734	0.331795	-0.0696932	0.00632106	0.0602778	0.0102324	-0.179017
C2_00550W	CAALFM_C200550WA	0.423401	0.934304	0.719593	0.858696	0.502338	0.610865	0.504154	0.950744	0.336618
C2_00560W	CAALFM_C200560WA	1.20953	0.62011	0.835145	1.4356	1.29172	1.26642	0.382571	1.71144	1.48695
C2_00570W	CAALFM_C200570WA	-0.463292	-0.70063	-0.381152	-0.496228	-0.185872	-0.521448	-0.306811	-0.358563	-0.288328
C2_00580C	SMF3	0.237571	-0.134282	0.315034	-0.306718	0.22017	-0.47007	0.198169	-0.13328	-0.442076
C2_00590W	CAALFM_C200590WA	-0.407945	-0.676954	-0.38714	-0.33695	-0.409669	-0.350904	-0.0907472	-0.0212458	-0.0126319
C2_00600C	CAALFM_C200600CA	-0.776086	-1.22793	-0.764748	-0.678419	-0.644219	-0.742722	-0.621058	-0.61962	0.0279843
C2_00610C	ATP18	-0.671377	-0.511057	-0.581508	-0.415036	-0.513902	-0.346967	-0.461515	-0.207445	-0.0219717
C2_00620C	CAALFM_C200620CA	-0.524964	0.0870358	-0.69521	-0.103546	-0.228122	0.0525833	-0.426064	-0.0168583	0.134605
C2_00630C	CAALFM_C200630CA	0.449469	3.58419	1.18279	0.486289	1.25122	0.556642	0.556041	0.41493	-0.170293
C2_00640W	CAALFM_C200640WA	1.06614	0.972354	1.42975	0.78786	0.986326	0.649268	1.12887	0.301254	0.0827197
C2_00650W	CAALFM_C200650WA	-0.0519365	0.309034	-0.158733	0.204805	-0.224634	0.167259	0.0554214	0.613634	0.291143
C2_00660C	SOD4	2.6973	3.71229	4.51128	0.174816	5.49426	3.40286	3.12646	3.24703	-0.481004
C2_00680C	SOD5	8.17516	6.84579	6.01866	1.84154	8.41688	6.83958	7.81465	4.91502	1.00076
C2_00690W	CAALFM_C200690WA	1.13289	2.69615	0.778015	1.00724	0.828821	1.77906	1.17498	1.06159	0.483286
C2_00700W	CAALFM_C200700WA	-0.71783	-0.755983	-1.07943	-0.730719	-0.669522	-0.578406	-0.484843	-0.508809	-0.251354
C2_00710W	NPL6	-0.325904	-0.30844	-0.427581	-0.239996	-0.305727	-0.146527	-0.307104	-0.0121878	0.0715512
C2_00720C	FGR15	-0.17078	-0.738904	0.0127428	-0.763038	-0.0564685	-0.569159	-0.0781738	-0.12732	-0.0608843
C2_00730C	CAALFM_C200730CA	-0.384194	-0.725704	-0.441462	-0.593705	-0.0149139	-0.332645	-0.31798	-0.432161	-0.311928
C2_00740C	CAALFM_C200740CA	0.555486	-0.498236	0.679085	-0.724269	0.389327	-0.649353	0.38664	-0.45568	-0.328122
C2_00750W	CAALFM_C200750WA	-0.209613	-0.0719421	-0.360499	-0.235977	-0.620251	-0.628611	0.00329643	-1.09069	0.449249
C2_00760C	CAALFM_C200760CA	4.03535	-1.60243	0.504391	-1.50097	-1.39038	-1.42408	2.56732	-0.62454	-0.670425
C2_00770W	CAALFM_C200770WA	1.09198	0.648169	1.80939	-0.182755	1.23585	0.12833	0.978721	0.274281	-0.377734
C2_00780W	POT1-2	0.50562	0.423596	0.81349	0.231213	0.120858	0.163159	0.507028	0.456138	0.10215
C2_00790C	CAALFM_C200790CA	-0.0356997	0.541877	-0.0131537	0.821545	-0.0806905	0.282959	-0.0566853	-0.00568876	-0.0202654
C2_00800C	PGA27	-0.277665	0.363621	-0.00723929	-0.240451	-0.107641	-0.197606	-0.117988	-0.319366	-0.362812
C2_00810C	CAALFM_C200810CA	-0.284035	0.0770748	-0.518735	0.223642	-0.197551	0.210085	-0.320661	0.078671	0.106929
C2_00820W	CAALFM_C200820WA	-0.488026	-0.144096	-0.77838	-0.167997	-0.24275	-0.0783113	-0.369849	-0.235315	-0.116954
C2_00830C	CAALFM_C200830CA	-0.331436	-0.519822	-0.392911	-0.382428	-0.107461	-0.364619	-0.199767	-0.330355	-0.259672
C2_00840W	CAALFM_C200840WA	-0.140058	0.201281	-0.23024	0.00203095	-0.00462518	0.0997387	-0.0422328	0.0323908	0.105382
C2_00850W	MSF1	-1.0631	-1.21698	-1.52494	-0.644144	-1.07973	-0.709947	-0.847644	-0.472393	-0.21521
C2_00860C	CAALFM_C200860CA	1.07011	3.12091	0.362437	1.68936	3.47166	1.4354	0.601382	1.25983	0.471073
C2_00870W	CAALFM_C200870WA	0.148144	0.471582	0.516927	0.143021	0.398486	0.0754613	0.183758	0.226315	-0.172156
C2_00880W	CAALFM_C200880WA	-0.284136	-0.308999	-0.0242433	-0.0265314	-0.0957668	-0.0511451	-0.151241	0.0218344	-0.0725257
C2_00890W	CAALFM_C200890WA	-0.00774366	-0.238163	0.0429172	-0.474167	-0.0977729	-0.375542	0.419026	-0.361541	-0.958272
C2_00900W	CAALFM_C200900WA	1.22398	1.02883	0.494838	1.50416	0.0270462	-1.46275	1.67264	0.753767	0.799124
C2_00910W	PGA19	0.812079	-0.458177	0.993696	-0.876008	0.316074	-1.13159	0.767763	-1.07625	-1.49192
C2_00920W	CAALFM_C200920WA	0.0902157	-0.128743	0.213046	0.0689022	0.166147	0.029209	0.185038	-0.0205346	0.16797
C2_00930C	VPS24	-0.0139324	0.323609	-0.384128	0.493479	-0.314471	0.520325	-0.0519513	0.284574	0.660892
C2_00940W	CAALFM_C200940WA	0.983922	0.901698	0.284741	0.928731	-0.0937342	0.997629	0.864422	-0.197102	1.21522
C2_00950C	RFC5	-0.083542	-0.31386	-0.0732286	-0.166021	0.0986284	-0.0423643	-0.0161669	-0.00560541	0.00111989
C2_00960C	MXR1	0.263276	1.67301	-0.261767	0.498316	-0.197335	0.489154	0.558335	1.32796	0.486976
C2_00970C	UBP13	0.677245	0.360309	1.11105	0.0836857	1.06691	0.266568	0.680771	0.295461	0.213971
C2_01000W	HGT7	0.478402	1.30322	0.32471	0.91304	0.662581	0.443441	-0.317513	-5.04603	1.03238
C2_01010W	HGT8	-2.21633	-1.61557	-3.35558	-1.73874	-2.09617	0.434904	-2.47949	-2.97897	-0.041515
C2_01020W	HGT6	5.92336	4.10865	4.31328	2.16991	3.3363	1.30879	4.67025	0.363498	0.991185
C2_01030W	CAALFM_C201030WA	-0.893246	-0.909535	-1.26308	-0.535502	-0.625455	-0.589847	-0.620785	-0.544389	-0.191213
C2_01040W	CAALFM_C201040WA	0.133419	0.367527	-0.613296	-0.769162	-0.225412	-0.445712	0.151995	0.185166	-0.435625
C2_01050W	CAALFM_C201050WA	-0.325884	-0.0259925	-0.247139	0.221479	-0.11514	0.121405	-0.10576	-0.134385	-0.0838656
C2_01060C	CAALFM_C201060CA	-0.0960614	0.448545	-0.369292	0.403086	-0.0656947	0.542856	-0.0339151	0.307488	0.178327
C2_01070W	CAALFM_C201070WA	-0.838422	-0.402367	-1.37035	-0.282599	-0.677119	-0.169436	-0.801648	-0.407575	-0.143947
C2_01090C	ERG28	-0.179899	-0.402155	-0.0389509	-0.0193367	0.225051	-0.0643272	-0.229005	-0.469753	-0.254674
C2_01110C	BCY1	-0.0539865	-0.0929012	0.315154	0.117399	0.285048	0.155142	0.215916	0.145271	-0.10834
C2_01120W	KAR2	0.279973	-0.376183	0.403937	0.326311	0.730241	0.185734	0.522172	-0.176338	-0.203107
C2_01130W	NOT3	-0.471445	-0.27689	-0.700048	-0.210397	-0.0966169	-0.0721223	-0.39037	-0.341372	-0.0304219
C2_01140C	CAALFM_C201140CA	-0.220763	-0.448061	-1.10427	-0.730968	-0.237218	-1.2487	0.737405	1.594	-0.499992
C2_01150W	PEX12	-0.0583419	-0.660533	0.244712	-0.683006	-0.440975	-0.572883	0.190639	0.248763	-0.198637
C2_01160W	CAALFM_C201160WA	-0.37645	0.167383	-0.673116	0.00568245	-0.0728573	0.289383	-0.298686	-0.189346	0.0313079
C2_01170C	CAALFM_C201170CA	-0.156141	-0.461825	-0.233102	-0.211814	0.108048	-0.120529	-0.0526202	-0.246068	-0.0106521
C2_01180W	COX17	-0.490269	-0.758876	-0.451015	-0.556281	-0.343873	-0.724339	-0.544859	-0.750029	-0.406262
C2_01190C	CAALFM_C201190CA	-0.277399	-0.0728414	-0.289365	-0.246848	-0.215458	-0.24412	-0.168715	0.0620592	-0.261489
C2_01200C	REG1	-0.0294137	-0.0294728	0.215716	0.060551	0.16843	0.237195	0.0731791	0.00327441	-0.0181849
C2_01210C	HNM1	-0.397498	0.364756	0.143026	0.642911	0.17631	-0.129294	-0.368166	-0.175684	-0.388271
C2_01220W	CAALFM_C201220WA	-0.271738	0.144617	-0.620401	0.358783	-0.412196	0.424675	-0.111903	0.262659	0.343563
C2_01230W	CAALFM_C201230WA	-0.0581103	-0.56287	-0.0391602	-0.300036	0.136865	-0.192897	-0.0755954	-0.0570704	-0.151048
C2_01240C	CAALFM_C201240CA	-0.25376	0.281198	-0.633442	0.260586	-0.676735	0.185423	-0.33076	0.371029	0.32785
C2_01250W	CAALFM_C201250WA	0.771044	0.354979	1.18097	0.384488	0.550979	0.123957	0.658669	0.399426	-0.171617
C2_01260W	CAALFM_C201260WA	-0.0494041	-0.388713	-0.304593	-0.144256	-0.310761	-0.156699	0.0533364	0.280981	-0.0114399
C2_01270W	CHA1	2.43917	-2.35374	2.91871	-0.718858	-1.63913	-2.55478	2.76789	1.94973	-0.631679
C2_01300C	MNN24	1.12717	0.822103	1.48883	0.176382	1.71869	0.73091	0.560981	-0.924232	-0.961131
C2_01310W	CAALFM_C201310WA	0.26257	0.168537	0.623785	0.172169	0.395994	0.0835039	0.333567	-0.0257932	-0.0917011
C2_01320W	CAALFM_C201320WA	-0.44819	-0.543657	-0.781007	-0.440979	-0.241169	-0.0925174	-0.312499	-0.469405	-0.0717803
C2_01330C	SIR2	0.887945	1.28349	1.4313	0.448157	1.21171	0.521046	0.879938	0.257732	-0.272587
C2_01340W	CAALFM_C201340WA	0.419425	0.184388	0.858958	0.0249792	0.70303	0.0608538	0.33434	-0.263987	-0.142406
C2_01350C	SNX4	0.236727	0.852882	0.535121	0.3868	0.419627	0.553989	0.332245	0.355275	0.0904953
C2_01360C	DCW1	-0.363807	-0.458605	-0.445997	-0.490259	-0.276599	-0.541409	-0.344716	-0.2912	-0.239675
C2_01370C	CAALFM_C201370CA	-0.61896	-0.064777	-1.03882	-0.146534	-0.480057	-0.217052	-0.442575	-0.281662	-0.231738
C2_01380W	PLB4.5	1.42985	0.0440461	0.881002	0.521148	1.14576	1.50363	0.559209	1.1269	-0.205851
C2_01390W	CAALFM_C201390WA	0.131903	0.357337	0.16547	0.0659949	0.0894327	0.174944	0.333407	0.446401	0.287524
C2_01400C	ESC4	-0.105057	-0.188605	-0.150906	-0.12874	-0.416235	-0.227541	0.0819608	0.304587	0.15408
C2_01410C	CLB2	-0.105854	-0.471609	-0.194469	-0.537966	-0.0797381	-0.212437	-0.0140411	0.0105581	-0.146699
C2_01420C	CAALFM_C201420CA	-0.0452488	0.216211	0.0677802	0.00105369	0.0071336	0.0748175	-0.137275	0.351236	-0.0889297
C2_01430W	APT1	-0.877666	-0.281086	-1.05186	-0.173685	-0.658437	-0.233852	-0.716712	-0.357951	-0.137826
C2_01440C	CAALFM_C201440CA	0.262003	-0.147119	0.213339	-0.191102	0.206712	-0.188514	0.199318	-0.497966	-0.46123
C2_01450C	CAALFM_C201450CA	1.87159	2.20479	0.562873	-0.115306	-3.70602	-0.703803	1.97091	3.89538	-0.194956
C2_01460C	CAALFM_C201460CA	1.30388	1.25951	0.130322	0.669205	0.263639	0.708265	0.842272	2.07332	0.19572
C2_01470W	SRB9	0.239631	0.163863	0.38105	0.252132	0.264763	0.24345	0.374126	0.328355	0.148869
C2_01480W	SPT5	-0.152212	0.0538515	-0.400455	-0.0341744	-0.249862	0.0224112	-0.128895	0.049881	0.158625
C2_01490C	CAALFM_C201490CA	-0.320539	0.00475459	-0.217484	-0.0438157	-0.0477323	0.0838686	-0.204032	0.0556936	0.156911
C2_01500W	CAALFM_C201500WA	-0.331425	0.227096	-0.579934	0.200558	-0.364381	0.422106	-0.468784	0.388551	0.384915
C2_01510C	CAALFM_C201510CA	-0.598815	-0.510771	-0.613527	-0.448576	-0.259128	-0.308588	-0.626723	-0.625002	-0.359652
C2_01520W	PPE1	-0.189766	-0.345419	-0.0603904	-0.190812	0.130363	-0.127927	-0.0655691	-0.119001	-0.0428597
C2_01530C	CAALFM_C201530CA	-0.106398	0.425449	0.0994606	0.364827	-0.183517	0.0345506	-0.125702	-0.146353	-0.0881014
C2_01540W	CAALFM_C201540WA	1.53285	6.97076	2.89908	1.30116	0.959184	0.920916	1.11706	0.80614	-0.103677
C2_01550W	SMP2	-0.144807	0.234642	-0.343471	0.205006	-0.497819	0.0456371	-0.0887257	0.0466467	0.0587463
C2_01560W	BMT5	0.612859	0.275541	0.744897	0.149915	0.400511	0.172454	0.550808	-0.0574383	0.126815
C2_01570W	CAALFM_C201570WA	-0.171983	-0.132675	-0.589308	-0.128144	-0.383807	-0.0505639	-0.15964	-0.0443707	-0.0421259
C2_01580W	REX2	-1.14268	-0.479801	-2.12734	-0.564888	-1.32206	-0.465756	-0.978373	-0.459308	-0.1239
C2_01590W	COX13	-0.501664	-1.30152	-0.951875	-0.961185	-0.792887	-0.9831	-0.451524	-0.675112	-0.533414
C2_01600C	CDC55	-0.157392	-0.333035	0.0105273	-0.27534	-0.160566	-0.185584	-0.0738075	0.00840766	0.00859033
C2_01610C	RPS26A	-0.890358	-0.868066	-1.43898	-0.582404	-0.614917	-0.462676	-0.855338	-0.729931	-0.060091
C2_01620W	COX4	-0.487729	-0.757385	-0.912141	-0.413921	-0.766423	-0.465709	-0.311383	-0.120105	-0.068304
C2_01630W	CAALFM_C201630WA	-1.35236	-0.711168	-3.66157	-1.27412	-3.19662	-2.3389	-0.237471	1.24409	-0.261128
C2_01640W	SLA1	0.202539	0.213337	-0.0844451	-0.0453037	0.0303117	0.0576286	0.234897	0.067967	-0.185827
C2_01650W	CAALFM_C201650WA	1.39418	0.271943	1.61567	0.644568	0.95184	0.338296	1.42355	0.768431	-0.830759
C2_01660C	CAALFM_C201660CA	1.2225	0.395917	1.36359	0.331768	0.877476	0.213115	1.02676	0.389404	-0.342632
C2_01670C	STT3	-0.0187768	-0.411072	-0.0849053	-0.0707463	0.243172	-0.126569	0.0137555	-0.284873	-0.318717
C2_01680C	CAALFM_C201680CA	0.333266	0.317786	0.427177	-0.0636127	0.168091	-0.0774934	0.207075	0.226665	0.0149275
C2_01690W	CAALFM_C201690WA	-0.512166	-1.26983	-0.873961	-0.799707	-0.552792	-0.724486	-0.477536	-0.47722	-0.322859
C2_01700C	HAP42	-0.35212	-0.605907	-0.41488	-0.58323	-0.451919	-0.477497	-0.22601	-0.146789	0.148225
C2_01710W	HSK3	0.633744	-0.193119	0.723844	-0.566774	0.507726	-0.517634	0.371996	-0.03643	-0.627773
C2_01720C	CAALFM_C201720CA	-0.19262	-0.587638	-0.511937	-0.265909	-0.256628	-0.340752	-0.274199	-0.406301	-0.340935
C2_01730W	CAALFM_C201730WA	-0.487151	-0.768512	-1.04722	-1.17243	-0.581888	-0.996925	-0.58081	-0.891544	-0.850203
C2_01740C	CAALFM_C201740CA	-1.43726	-1.78197	-2.33697	-1.41262	-1.18972	-1.31921	-1.42366	-1.42031	-0.704885
C2_01750C	CAALFM_C201750CA	1.50835	1.03816	1.3964	1.77863	-0.091295	0.792995	1.63779	2.12552	1.46899
C2_01760C	CAALFM_C201760CA	0.20813	0.469468	-0.122419	0.463017	0.146741	0.490187	-0.0730011	0.469029	0.309463
C2_01780W	MSB2	1.33462	0.77638	1.26623	0.869426	1.12005	0.97493	1.15738	0.583306	0.193178
C2_01800W	CAALFM_C201800WA	0.252203	0.689172	-0.0739641	0.14171	0.127708	0.152101	0.558218	0.054273	-0.799246
C2_01820C	CAALFM_C201820CA	-0.0490464	0.169757	-0.258642	0.138507	-0.058553	0.234471	0.0477574	0.222998	0.104054
C2_01830W	PRP39	-0.097775	0.131803	-0.527312	0.073544	-0.158187	0.33797	-0.0761164	0.0862932	0.178421
C2_01840C	RAD7	0.153107	0.140574	0.0497601	0.087667	-0.0723081	0.208905	0.129771	0.302606	0.0704809
C2_01850W	RAD23	-0.472214	-0.21621	-0.69222	-0.0331484	-0.419402	0.0578142	-0.335985	0.00322037	0.0837273
C2_01860C	CAALFM_C201860CA	-0.223942	-0.426357	-0.482048	-0.24984	-0.098021	0.0291721	-0.184122	-0.282524	-0.175912
C2_01870C	CAALFM_C201870CA	-0.0448553	-0.308098	0.45591	-0.0439381	0.369504	-0.0975108	0.295323	-0.0545657	-0.298564
C2_01880C	ZCF6	0.383025	0.516209	0.796747	0.775964	0.540938	0.935619	0.77289	0.900206	0.5174
C2_01890W	CTF1	-0.0966431	0.228663	-0.0832801	-0.0879823	-0.0816467	0.0816201	-0.0836233	0.128094	0.00252908
C2_01900C	CAALFM_C201900CA	-0.0693229	0.139371	-0.254932	0.0307453	-0.0988155	0.112951	0.0165231	0.260806	0.0865483
C2_01910W	CAALFM_C201910WA	0.00853693	0.17609	0.00558859	0.0702128	-0.0389633	-0.0876507	-0.00203622	0.0220737	0.31895
C2_01920C	CAALFM_C201920CA	0.243468	0.013476	0.469361	0.418229	-0.0159327	0.184974	0.212954	0.308422	-0.0658433
C2_01930C	CAALFM_C201930CA	0.788797	-0.30804	1.59291	0.497639	1.24613	0.46591	0.554715	-0.332496	-0.615484
C2_01950C	AMN1	-0.16534	0.41265	0.133702	-0.224633	0.0116233	0.24957	-0.14047	-0.25831	0.15443
C2_01960C	CAALFM_C201960CA	0.0154996	0.360038	0.014868	0.304074	-0.253821	0.532213	-0.287748	0.30533	0.589657
C2_01970C	ROD1	-0.136239	1.1971	-0.164631	1.06005	-0.321805	0.346382	-0.439233	-0.875641	0.16078
C2_01980C	SRD1	0.45165	0.811546	1.11666	-0.221774	0.615652	-0.331241	0.263695	-0.638299	-0.472347
C2_01990C	FAB1	0.738944	0.314908	0.89116	0.272827	0.353494	0.14263	0.668485	0.155269	-0.0207187
C2_02000W	CAALFM_C202000WA	-0.0186942	-0.321079	0.167168	-0.0928869	0.268042	-0.14959	0.0721805	-0.193101	-0.132623
C2_02010C	CHT4	0.267766	0.24113	-0.0462897	0.392573	0.261739	0.314161	0.330492	0.406451	0.319933
C2_02020W	CAALFM_C202020WA	-0.195733	-0.266866	-0.411828	-0.111786	-0.0603999	-0.0643727	-0.0407252	-0.129325	0.0478007
C2_02030W	ARO3	-1.00313	-0.732393	-0.924359	-0.328963	-0.911973	-0.554779	-0.836342	-0.749849	0.0124129
C2_02040W	CAALFM_C202040WA	-0.00985216	-0.0350841	-0.0566558	-0.0169698	0.0673644	0.106912	0.00749466	0.124525	0.0942037
C2_02050C	CAALFM_C202050CA	0.371287	0.319289	0.693975	-0.277757	0.232229	0.0406468	0.442747	0.162225	0.134847
C2_02060C	FMO1	1.91179	1.81992	5.67376	2.02279	1.52652	1.64389	2.85083	3.2775	1.04036
C2_02070W	SPR3	-0.597842	-1.34146	-0.266708	-0.370591	-0.663755	-0.291551	0.287808	0.277199	0.286383
C2_02080W	CAALFM_C202080WA	-1.2148	-1.733	-1.39094	-1.42413	-1.15519	-1.84048	-1.58712	-2.89022	-2.98768
C2_02090W	CAALFM_C202090WA	-0.606658	-0.927303	-0.735723	-0.241286	-0.447174	-0.291053	-0.415089	-0.455407	-0.0438032
C2_02100W	SNF2	-0.268331	-0.289129	-0.464133	-0.185499	-0.2271	-0.142219	-0.149618	-0.133239	0.0292114
C2_02110C	CAALFM_C202110CA	0.276898	0.0291754	0.405151	-0.372154	0.268021	-0.235883	0.263762	-0.0972333	-0.37026
C2_02120W	CAALFM_C202120WA	-0.674764	-0.255371	-1.24523	-0.211352	-0.830813	-0.235831	-0.568439	-0.19411	-0.16107
C2_02130C	CAALFM_C202130CA	0.982402	1.79351	0.255328	-0.0884367	0.396701	0.204478	1.09425	0.41773	-0.846392
C2_02140C	CAALFM_C202140CA	1.25332	1.30255	0.468468	-0.830691	0.359723	-0.557166	1.18854	0.114751	-2.87167
C2_02150C	CAALFM_C202150CA	-0.406632	-0.0438372	-0.644015	-0.206591	-0.464976	-0.163507	-0.300725	-0.191518	-0.0679838
C2_02160W	SAM37	-0.791823	-0.656836	-1.41897	-0.553404	-0.927423	-0.220622	-0.590765	-0.357671	-0.026308
C2_02170W	CAALFM_C202170WA	-0.411725	-0.757728	-0.905968	-0.473981	-0.296809	-0.462302	-0.477474	-0.544407	-0.268719
C2_02180W	CAALFM_C202180WA	0.519662	0.256433	0.305927	0.344069	1.2784	0.435546	0.524393	0.531653	0.0828893
C2_02190C	CAALFM_C202190CA	0.246536	-0.388564	0.0641001	-0.488743	0.306318	-0.180462	0.00488102	-0.00858855	-0.109452
C2_02200W	CAALFM_C202200WA	0.105912	-0.529845	0.289162	-0.468612	0.703786	-0.371748	0.0998533	-0.808899	-0.665918
C2_02210C	TLG2	0.200091	-0.530124	0.163894	-0.379031	0.0368946	-0.36567	0.20527	0.298907	-0.0466158
C2_02220C	CAALFM_C202220CA	0.531255	2.37165	2.55774	2.47732	1.21301	2.50316	0.557328	0.791568	0.932642
C2_02230C	CAALFM_C202230CA	2.18447	0.0567573	6.63442	0.637009	-1.07137	-0.146304	2.87025	3.16779	-0.105789
C2_02240C	HEX3	0.530855	0.429281	0.693721	0.247313	0.288026	0.146747	0.366257	0.208195	-0.0171352
C2_02250C	OPI1	0.0434488	-0.231306	0.399935	-0.11638	-0.0195145	-0.668758	0.0219735	-0.367579	-0.336939
C2_02260W	CAALFM_C202260WA	-0.20566	-0.257226	0.0163342	-0.0178703	0.0301216	-0.129759	-0.00555076	-0.0248332	-0.0335594
C2_02270C	CAALFM_C202270CA	-1.05344	-0.986801	-1.29908	-0.572715	-0.816559	-0.702128	-0.861421	-0.678519	-0.164941
C2_02280W	CAALFM_C202280WA	-0.687485	-0.995485	-1.17959	-0.613008	-0.728548	-0.725147	-0.429344	-0.353421	-0.240867
C2_02290C	CAALFM_C202290CA	-0.0141657	-0.0421404	0.290995	-0.00316252	-0.055674	-0.0738753	0.151468	-0.020582	-0.0698996
C2_02300W	CAALFM_C202300WA	-0.65234	-0.880375	-0.815675	-1.02451	-0.669146	-0.957106	-0.674997	-0.577686	-0.551253
C2_02310W	CAALFM_C202310WA	-0.791792	-1.51991	-1.34367	-0.733931	-1.17436	-0.668186	-0.534012	-0.474733	-0.0632066
C2_02320C	CPR3	-0.390976	-0.431141	-0.342833	-0.275665	-0.14618	-0.215827	-0.187061	0.00911106	-0.130716
C2_02330W	CAALFM_C202330WA	-0.252504	-0.283875	-0.277315	0.0328441	-0.246957	0.0211331	-0.0969977	0.160944	0.161473
C2_02340C	ENT3	-0.228184	-0.031013	-0.245813	-0.000741127	-0.124737	-0.0465818	-0.124331	0.040751	0.0706367
C2_02350C	SAC3	-0.166441	-0.193073	-0.339941	-0.0453666	-0.119154	0.00747317	-0.0577046	-0.0376855	0.0213616
C2_02360C	CAALFM_C202360CA	-0.305617	-0.153699	-0.8683	-0.00721124	-0.433421	-0.00868988	-0.0730772	0.104839	0.00262519
C2_02370C	HOM2	-0.964786	0.134192	-1.18678	-0.334352	-0.751803	-0.300785	-0.821854	-0.376941	-0.0364694
C2_02380W	POB3	-0.0307442	-0.0681941	-0.150636	-0.0180246	-0.0925758	0.0549704	0.043248	0.120261	0.124109
C2_02390W	CAALFM_C202390WA	2.21291	1.40159	2.66107	-0.339227	0.755826	-0.0140703	1.69616	-0.37692	-0.468496
C2_02400W	ECM3	0.107025	0.68007	0.281871	0.209137	-0.452939	-0.0559858	-0.0372964	0.167475	-0.0436159
C2_02410W	CAALFM_C202410WA	0.496511	0.120241	0.806836	0.0456134	0.472577	0.0876992	0.602764	0.23199	-0.203075
C2_02420C	CAALFM_C202420CA	-0.615107	0.124591	-1.17794	0.157601	-0.6872	0.118001	-0.535382	0.117777	0.0454045
C2_02430W	UTP21	-0.694192	0.348683	-1.70676	0.238118	-0.847635	0.256158	-0.586567	0.197521	0.317708
C2_02440W	CAALFM_C202440WA	0.485896	0.493804	0.824795	0.360703	0.35245	0.159655	0.573898	0.29898	0.230009
C2_02450C	UTP22	-1.06444	-0.0202027	-1.79326	-0.0138904	-1.09632	0.0208493	-0.826192	-0.133174	0.302756
C2_02460W	ERG7	0.0608985	-0.485576	-0.148009	-0.266135	-0.0614495	-0.136688	0.084111	-0.119642	-0.161064
C2_02470C	ATO7	1.23739	-0.166581	1.57481	0.0104894	0.169392	-0.30288	-0.146908	NAME?	#NAME?
C2_02490C	CAALFM_C202490CA	-0.107795	0.235943	-0.0965755	0.085652	0.0605136	0.293036	0.0345037	0.360695	0.146816
C2_02500W	CAALFM_C202500WA	0.00460806	-0.0826021	0.0777977	-0.0989867	-0.0556125	-0.15507	0.0335634	0.0220892	-0.0304253
C2_02510W	PRS1	-0.779516	-0.0192649	-1.56883	-0.182998	-0.924936	-0.162653	-0.706851	-0.123757	0.0671633
C2_02520W	CAALFM_C202520WA	0.121987	0.354507	0.233661	0.266518	0.165849	0.401749	0.196457	0.34514	0.307775
C2_02530W	CAALFM_C202530WA	0.235273	0.534306	-0.9627	0.170881	-0.811638	0.581788	0.0899159	0.250727	0.0363418
C2_02540W	CAALFM_C202540WA	-0.990911	-0.248635	-2.09933	-0.296479	-1.15684	-0.044592	-0.915742	-0.278193	0.0914999
C2_02550C	CAALFM_C202550CA	1.25515	1.57546	1.92049	1.44546	1.68763	1.17998	1.36052	0.717853	0.773833
C2_02570W	CAALFM_C202570WA	1.40626	1.29087	1.97241	1.14901	1.16453	0.818209	1.26153	0.440945	0.202447
C2_02580W	CAALFM_C202580WA	0.737436	0.418178	1.81311	0.392731	-0.519595	-0.32784	0.460775	0.573564	0.104994
C2_02590W	ZRT2	0.726151	0.0522288	0.206542	0.33027	2.01923	0.301384	0.748073	0.505394	-0.017634
C2_02600C	FGR22	0.954993	1.1298	1.53072	1.44161	0.701305	1.0403	1.1844	1.35979	0.591142
C2_02610C	HGT20	-0.886355	2.19283	0.160157	2.12041	1.04393	2.42302	-0.337128	1.06637	0.92374
C2_02620W	CAALFM_C202620WA	-0.0405449	0.0330717	0.512819	-0.359906	0.560672	-0.175864	0.0399304	-0.284819	-0.294454
C2_02630W	CAALFM_C202630WA	-0.112175	0.869197	-0.584644	0.857911	-0.244571	0.756589	0.00105274	0.700822	0.49862
C2_02660W	CAALFM_C202660WA	0.413889	0.36996	0.421033	-0.432021	0.241861	-0.325192	0.313302	0.0667183	-0.287417
C2_02670C	CAALFM_C202670CA	0.344229	0.436349	0.592174	0.0985626	0.42061	-0.0369232	0.229175	-0.402703	-0.180808
C2_02680W	PDR17	0.21408	0.263678	0.329962	0.204367	0.597285	0.346024	0.172447	-0.306303	-0.0790362
C2_02690W	SER2	-0.901102	0.0303743	-0.829473	0.192997	0.00922669	0.176803	-0.861894	-0.217573	-0.0857488
C2_02700C	CAALFM_C202700CA	0.3024	0.0429876	0.566285	0.0834854	0.289863	-0.0931077	0.358455	0.166885	-0.160861
C2_02710C	CAALFM_C202710CA	-1.05691	-0.517999	-1.2729	-0.33394	-0.896321	-0.53694	-0.866648	-0.476517	-0.231178
C2_02720W	CAALFM_C202720WA	-0.262953	-0.100028	-0.189019	0.0330091	0.00979384	-0.0895276	-0.174078	-0.124821	-0.0536562
C2_02730W	CAALFM_C202730WA	0.076864	0.311448	0.190024	0.218295	0.0254437	0.279461	0.237854	0.323787	0.194827
C2_02740C	HPT1	-1.13506	-0.886736	-1.80168	-0.652882	-1.02133	-0.533944	-1.0642	-0.650878	-0.139407
C2_02750C	CAALFM_C202750CA	-0.446814	-0.662748	-1.28229	-0.52852	-0.889152	-0.437719	-0.410577	-0.667113	-0.170589
C2_02760W	LHS1	0.473746	-0.0121799	0.534236	0.282833	0.557875	0.178324	0.608141	0.129962	-0.120899
C2_02770W	CAALFM_C202770WA	-0.280113	-0.215522	-0.422257	-0.296379	-0.210145	-0.179176	-0.218498	-0.256842	0.00388186
C2_02780C	BUB2	-0.132189	-0.0452865	0.0605043	-0.114672	0.0549429	-0.02063	-0.0589403	-0.087216	-0.0237532
C2_02790C	CAALFM_C202790CA	1.37102	3.62931	1.29628	1.47273	-0.0843536	0.592938	1.47591	1.34056	-0.0831913
C2_02800W	CAALFM_C202800WA	-0.170738	-0.294244	-0.12527	-0.386897	0.0892271	-0.363778	-0.0854705	-0.115702	-0.21948
C2_02810C	NCB2	-0.487163	-0.452646	-0.502684	-0.426667	-0.233542	-0.22632	-0.367901	-0.215616	-0.179362
C2_02820C	CAALFM_C202820CA	-0.447922	0.251512	-0.820999	0.334523	-0.607164	0.209487	-0.25897	0.41261	0.126212
C2_02830C	SGT2	0.00809903	-0.309368	-0.0612843	-0.101664	-0.0701925	-0.19539	0.22612	-0.0936415	-0.146264
C2_02840C	CAALFM_C202840CA	0.806632	0.110356	1.06226	0.165416	0.672888	0.152224	0.783976	0.276999	0.115775
C2_02850W	UGA6	3.05	2.7892	1.46269	0.0823572	0.866903	0.0685443	2.37082	0.046744	-0.210948
C2_02860W	SUR2	0.905367	0.87001	0.423068	0.48939	0.245172	0.261215	0.366242	0.0376619	-0.12346
C2_02870W	CAALFM_C202870WA	0.201228	-0.189234	0.397124	-0.147349	0.360841	0.0423492	0.207816	-0.0807662	-0.0106032
C2_02880C	EBP7	-0.230822	0.823459	0.42081	0.90524	0.263312	0.334634	-0.0264589	0.147454	-0.0188453
C2_02890W	SCT2	0.691271	0.419349	0.853891	0.513706	0.45381	0.447512	0.605281	0.682663	0.135093
C2_02900W	CAALFM_C202900WA	-0.0237017	-0.267007	0.0385135	-0.17666	0.115275	-0.0849599	0.0404578	-0.41471	0.0327034
C2_02910W	CAALFM_C202910WA	0.527197	0.84955	-0.350756	0.819797	-1.04151	0.862232	0.400874	0.353959	0.474874
C2_02920W	CAALFM_C202920WA	0.937885	1.41285	0.807358	1.36354	0.102621	1.18932	1.06996	0.46849	0.918637
C2_02930C	CAALFM_C202930CA	-0.0170413	0.495946	-0.973126	0.187709	-0.358889	0.434913	-0.168549	0.22403	0.14992
C2_02940W	MET1	1.22805	3.24854	0.42291	0.651402	-0.317243	0.511394	1.27287	2.19521	0.38913
C2_02950W	CAALFM_C202950WA	-0.306614	1.56591	0.0380179	-0.39529	-0.493579	-1.09359	-0.211415	-0.112951	-0.236418
C2_02960C	CAALFM_C202960CA	-0.363812	-0.0486596	-0.775813	-0.12863	-0.328604	-0.0281398	-0.295866	-0.128832	0.0762449
C2_02970C	ALD5	-0.416508	-1.08074	1.86464	-0.0206673	0.395065	0.955328	-0.144484	-0.90876	-0.226672
C2_02980C	DLD1	-0.0343646	-0.452813	0.220145	-0.406749	-1.10861	-1.1909	0.241854	0.580319	0.222732
C2_02990C	HYU1	0.432232	0.673221	0.688123	0.334735	0.372952	0.273367	0.519198	0.431832	0.15615
C2_03000C	CAALFM_C203000CA	-0.528365	0.154305	-0.670049	0.0722362	-0.226117	0.040552	-0.45723	-0.131267	0.137534
C2_03010C	RNR21	0.176202	0.180488	0.554611	-0.283577	0.226713	-0.13084	0.187447	0.350617	0.0821893
C2_03020C	CAALFM_C203020CA	1.28744	1.76906	1.1303	0.361767	1.46228	1.36084	0.883781	0.019433	-0.147391
C2_03030W	LIG4	0.283365	0.296769	0.0246875	0.116785	0.2441	0.926578	0.120888	0.0144152	0.169253
C2_03040W	PLC2	0.177543	0.672524	0.412192	0.8348	0.442958	0.465378	0.557081	0.411074	0.591588
C2_03050W	SHE9	-0.477544	-0.47056	-0.114641	-0.0743421	-0.273718	-0.24204	-0.0605087	0.0951177	-0.0301582
C2_03060W	PR26	-0.288145	-0.289727	-0.192936	-0.141773	-0.143194	-0.163854	-0.0519075	-0.182437	-0.0163908
C2_03070C	SMP3	-0.278835	0.180352	-0.223396	-0.0556361	0.0916901	-0.116239	-0.29372	-0.234377	-0.298354
C2_03080W	IDH2	-0.994949	-0.543323	-1.0422	-0.818765	-0.434761	-0.697413	-0.835459	-0.845365	-0.328311
C2_03090C	ADE8	-0.35465	0.544108	-0.215314	0.617869	0.155832	0.646234	-0.16197	0.629735	0.253796
C2_03100W	EFT2	-0.843149	-0.59287	-1.27539	-0.462524	-0.540311	-0.396036	-0.7316	-0.639864	-0.206522
C2_03110W	CAALFM_C203110WA	2.40951	-0.743022	-0.533871	-2.52059	-1.17806	-3.07246	0.558606	-0.735978	-2.11134
C2_03120W	AMO1	0.726475	6.41999	2.42034	1.02207	0.261247	0.407609	1.12496	1.01329	-0.523285
C2_03130W	CAALFM_C203130WA	-0.727367	-0.307543	-0.847888	0.178083	-0.474393	0.0598734	-0.672653	-0.0111455	0.174047
C2_03140C	CAALFM_C203140CA	0.156411	0.350952	0.450799	0.0527601	-0.120854	-0.164919	0.247255	-0.0643291	0.0723519
C2_03150C	CAALFM_C203150CA	0.163226	0.215872	0.562944	-0.106877	0.117186	-0.178677	0.244005	0.169264	-0.484474
C2_03160C	RNR1	-0.100125	0.258144	-0.223686	-0.0345722	-0.355987	-0.19527	-0.0503543	0.200581	0.0476854
C2_03170W	CAALFM_C203170WA	0.350575	0.769722	1.01803	0.394486	0.240869	0.0972646	0.33961	0.193708	-0.270077
C2_03180C	TOM1	-0.127577	-0.319699	-0.170867	0.00150018	-0.0851285	-0.0579849	-0.0735377	-0.0466544	0.0644034
C2_03200W	PRP3	-0.170569	0.609416	-0.410735	0.405705	-0.338934	0.44603	-0.079635	0.467066	0.199388
C2_03210W	CAALFM_C203210WA	-0.212951	-0.193985	0.0966888	-0.127448	-0.383317	-0.456483	-0.0536841	0.302478	0.189624
C2_03220C	STP4	0.51944	-0.74519	-0.754346	0.614068	-1.82074	0.391527	0.319663	-0.459166	0.994643
C2_03230C	FEN12	-0.439034	-0.763398	-0.605214	-0.378198	-0.488031	-0.593506	-0.298517	-0.442215	-0.35895
C2_03240C	ROM2	0.166888	0.103559	0.132585	0.0764765	0.0187867	-0.0625076	0.154142	0.0746263	0.105811
C2_03250W	AVT7	0.823547	1.0414	0.980911	0.240826	0.709929	0.129916	0.790512	0.53489	-0.289757
C2_03260W	CAALFM_C203260WA	0.00721084	-0.0164728	-0.113222	-0.0776203	0.328142	0.111256	-0.0182289	-0.0115945	-0.000178078
C2_03270W	GPM1	0.36554	0.538669	0.228559	0.718372	0.598806	0.544409	-0.194287	-0.482377	0.0288144
C2_03280W	NSP1	-0.221506	0.0739003	-0.385704	-0.0101443	-0.266291	0.131695	-0.196778	-0.112191	0.073663
C2_03290W	CAALFM_C203290WA	1.48592	1.25487	2.04968	1.34792	0.905456	0.702664	1.64376	1.43045	-0.401617
C2_03300W	HEM2	-0.481246	-0.164417	-0.349366	-0.101517	0.00915016	0.0423776	-0.267346	-0.0359404	0.0609869
C2_03310C	VPS20	0.482071	0.688311	0.107092	0.298342	0.183929	0.153863	0.28945	0.40025	0.288906
C2_03320W	CHK1	1.55744	1.92673	1.58308	1.55406	0.532782	0.479886	1.54121	1.08046	0.793578
C2_03330C	HOG1	0.0915391	0.0648896	-0.0182994	-0.0631432	0.0596503	-0.0577895	0.184605	0.0349237	-0.0801399
C2_03340W	CAALFM_C203340WA	0.601549	0.118337	0.777845	0.379617	0.560107	0.229703	0.65524	0.654381	0.358867
C2_03350W	PGA17	3.48951	0.149589	8.03943	-0.187852	0.688436	-1.45051	3.66143	3.99915	-0.862138
C2_03360W	CAALFM_C203360WA	-0.207033	0.572157	-0.287494	0.430807	0.0138199	0.41042	-0.0488191	0.0588943	0.0534142
C2_03370W	THI20	0.805241	2.37404	2.9333	3.18741	-0.497767	-0.2498	2.14516	2.77648	-0.183952
C2_03380W	PAN1	0.17819	-0.0586712	-0.0696099	-0.202794	0.0289784	-0.126552	0.0854142	-0.209963	-0.28133
C2_03390C	HSP78	1.07597	-0.542875	0.785587	-0.650409	0.180393	-0.78883	1.12284	-0.551426	-0.323884
C2_03400C	DFG16	0.547037	0.482949	0.675368	0.289265	0.609856	0.329336	0.546867	0.426344	0.185894
C2_03410W	CAALFM_C203410WA	-0.350588	0.153873	-0.531818	0.189175	-0.21887	0.253673	-0.231499	0.0964414	0.257187
C2_03420C	CAALFM_C203420CA	-0.057912	0.404263	0.0882375	0.22735	0.100285	0.293061	0.133359	0.338452	0.247959
C2_03430W	NBN1	-0.110947	-0.266094	-0.0927437	-0.350725	-0.217241	-0.39338	-0.0803236	0.00893014	-0.0964625
C2_03440W	PGA33	0.150511	-0.063789	0.340221	-0.36558	0.102788	-0.51883	0.0347004	-0.266109	-0.268731
C2_03450W	CAALFM_C203450WA	-0.768738	-0.461188	-1.23448	-0.188099	-0.932911	-0.252369	-0.676162	-0.199857	-0.110751
C2_03460C	CAALFM_C203460CA	0.171473	-0.494	0.100514	-0.31446	0.0899357	-0.444661	0.09211	-0.186941	-0.343948
C2_03470C	COX6	-0.469244	-0.943339	-0.813004	-0.375256	-0.688382	-0.487135	-0.259198	-0.160087	0.013694
C2_03490C	CAALFM_C203490CA	0.368185	0.175855	0.557375	-0.0556953	0.279171	-0.101911	0.474496	0.359127	-0.0812756
C2_03500W	CAALFM_C203500WA	0.342576	0.37355	0.29283	0.206596	-0.16338	0.302362	0.45412	0.779318	0.338138
C2_03520C	ADAEC	0.638988	0.673933	0.528405	0.975266	-0.0648802	1.01499	0.879953	1.25659	0.854889
C2_03530W	CAALFM_C203530WA	0.275639	-0.264611	0.361548	-0.0530088	0.252769	-0.117169	0.285741	-0.0585152	-0.269154
C2_03540W	RAD32	-0.810117	-0.189213	-1.76255	-0.380919	-1.66327	-0.14917	-0.519463	0.197192	0.0412869
C2_03550C	CAALFM_C203550CA	-0.024413	0.602353	-0.0583197	0.682772	0.0660863	0.615107	0.136803	0.676829	0.643922
C2_03560C	CAALFM_C203560CA	-0.809182	-0.714177	-1.41277	-0.311169	-0.651408	-0.29523	-0.592571	-0.359757	0.09308
C2_03570C	CAALFM_C203570CA	-0.307657	-0.125118	0.287287	-0.245919	-0.0476846	-0.416388	-0.260987	-0.061182	-0.0839888
C2_03590C	CAP4	0.43386	-0.541161	0.688067	-0.946915	0.4074	-0.735212	0.407845	-0.153784	-0.0650485
C2_03600W	BMT8	0.903192	1.07127	1.06168	0.510626	0.90911	0.720958	0.789173	0.352199	0.112004
C2_03610W	FMO2	0.684196	0.625611	1.45346	0.505116	0.958711	0.406383	0.880933	0.0577283	0.0108849
C2_03620W	IFK2	0.544025	-0.140383	0.982487	0.0975885	0.60018	0.229703	0.718495	-0.0822587	-0.0904043
C2_03630W	CAALFM_C203630WA	1.40715	1.75215	0.862297	0.752539	-0.568123	0.0912691	1.86509	1.60378	0.483206
C2_03640W	UGA11	1.97088	0.926754	2.23962	0.184038	0.205233	-0.028761	2.66042	2.47543	-0.155097
C2_03670W	SAP99	1.8457	2.36939	2.78467	1.86375	1.44004	1.76917	1.92016	1.90953	-0.0129361
C2_03680W	SAP98	0.180472	0.432694	0.582988	0.134407	0.229022	0.171851	0.470292	0.453689	-0.120435
C2_03690C	CAALFM_C203690CA	-0.876674	0.0165468	-0.785462	0.647283	-0.819674	0.205864	-0.280533	0.273329	0.719652
C2_03700W	CAALFM_C203700WA	-0.0444915	0.487344	-0.372605	0.698136	-0.194744	0.644913	0.00392832	0.434087	0.44104
C2_03710W	CAALFM_C203710WA	2.78521	2.89568	3.10445	2.91613	1.9302	1.85014	2.69291	2.45644	2.18188
C2_03750W	YIM1	0.268716	1.20426	0.622946	0.541125	0.217709	0.411343	-0.166279	-0.651089	-0.038635
C2_03760C	CAALFM_C203760CA	0.120459	0.0364854	0.0788533	0.053433	-0.170673	-0.0596716	0.240604	0.264269	0.0682572
C2_03770C	STE11	0.566714	0.29285	0.742156	0.236528	0.40502	0.206068	0.540086	0.298119	0.108872
C2_03780C	CAALFM_C203780CA	0.18048	-0.174609	0.210201	-0.114862	0.11657	-0.137928	0.0498583	-0.0320238	-0.12604
C2_03790C	ASR3	3.52945	1.34487	3.34328	0.889728	1.7763	1.05944	3.37441	2.19072	-0.183535
C2_03800C	CAALFM_C203800CA	0.235658	0.0865327	0.496205	0.210817	0.479037	0.152517	0.380985	0.259385	-0.0809711
C2_03810C	RPL21A	-0.765385	-0.586885	-1.11593	-0.210456	-0.407787	-0.20719	-0.590674	-0.363261	0.0983246
C2_03820C	RPS9B	-0.889334	-0.874147	-1.28068	-0.608868	-0.564517	-0.475728	-0.723057	-0.738447	-0.0752553
C2_03830W	CAALFM_C203830WA	-0.814713	-0.137317	-1.36872	0.276706	-0.777422	0.15737	-0.739342	0.0969781	0.256565
C2_03840C	INO4	0.397563	-0.46213	1.04125	-0.195161	0.221181	-0.293643	0.489076	-0.0541025	-0.327586
C2_03870W	GNA1	-0.331436	-0.608023	-0.619206	-0.377571	-0.109899	-0.34791	-0.265731	-0.475423	-0.35999
C2_03880C	CAALFM_C203880CA	-0.952592	-0.704245	-1.06826	-0.682825	-0.64313	-0.490024	-0.976177	-0.687119	-0.515159
C2_03890W	CAALFM_C203890WA	-0.179104	-0.625653	-0.220738	-0.252113	0.0554857	-0.27159	-0.0932847	-0.0935834	-0.162631
C2_03900C	CAALFM_C203900CA	-0.446181	-0.413048	-0.547897	-0.367955	-0.317128	-0.194957	-0.342344	0.0339799	-0.108779
C2_03910C	CAALFM_C203910CA	0.151489	0.0411214	0.0254109	0.130334	0.191714	0.189224	0.364856	0.162316	0.0185268
C2_03920C	GPI13	0.191333	0.173193	-0.037765	0.205769	0.0116101	0.161842	0.133152	0.115834	0.0480722
C2_03930C	CAALFM_C203930CA	0.0702043	-0.092352	-0.0225267	-0.277263	-0.0542717	-0.0849534	0.0722584	0.075319	-0.0463036
C2_03940C	SCH9	-0.385307	0.244757	-1.09793	-0.441593	-0.38448	-0.15993	-0.520727	-0.311648	-0.173268
C2_03950W	CAALFM_C203950WA	-1.05837	-1.11741	-1.64839	-0.522443	-0.898906	-0.579789	-0.926881	-0.55673	-0.281378
C2_03960W	RPL39	-0.983005	-1.03079	-1.52248	-0.861164	-0.758288	-0.733223	-0.952954	-0.940485	-0.339055
C2_03970W	CAALFM_C203970WA	0.226932	-0.568739	0.312936	-0.362277	-0.0714309	-0.448225	0.318976	-0.113221	-0.282492
C2_03980C	MED1	-0.421748	-0.499423	-0.678783	-0.221074	-0.468806	-0.204403	-0.351006	-0.0906761	-0.038891
C2_03990W	GCD7	-0.502212	-0.246747	-0.619758	-0.101149	-0.20292	-0.158976	-0.495932	-0.338213	-0.0768659
C2_04000C	CAALFM_C204000CA	0.62761	-0.49543	-2.53788	-0.41885	-0.543734	-0.82348	0.0755271	-2.03498	-0.825122
C2_04010C	HSP21	8.52246	0.0752745	4.56038	0.349451	1.32821	-0.356514	6.3932	0.545442	0.0962749
C2_04020C	SDS22	0.417363	-0.127528	0.300579	-0.0575615	0.118632	-0.0839256	0.398203	-0.0172335	-0.0833923
C2_04030C	ACP12	-0.819411	-0.98263	-0.974069	-0.470571	-0.707281	-0.623109	-0.543247	-0.416492	-0.11596
C2_04040C	DCK2	0.639141	0.515191	0.841382	0.51212	0.532195	0.562506	0.611683	0.50961	0.331514
C2_04050C	DCK1	2.30613	2.59834	2.05837	2.32407	1.6195	1.48634	2.28585	1.56062	0.194504
C2_04060C	SSY1	0.694163	1.4559	0.824116	0.874513	0.412753	0.770561	0.554872	0.763025	0.456845
C2_04070C	CAALFM_C204070CA	0.345802	2.05362	1.003	1.43739	-0.575275	1.08734	-0.0558548	0.630321	-0.282341
C2_04080W	CAALFM_C204080WA	-0.471191	0.539363	-1.24519	0.291168	-1.09425	0.220633	-0.11391	0.0427629	0.274232
C2_04090W	CAALFM_C204090WA	2.33923	2.10204	2.66004	1.40163	1.29809	0.355696	2.53287	1.61744	0.426997
C2_04100W	CAALFM_C204100WA	0.554177	0.491437	0.883497	0.350703	0.403165	0.217269	0.622115	0.776583	0.0853369
C2_04110W	CAALFM_C204110WA	1.43917	0.788392	1.59591	0.485724	-0.116861	0.16019	1.57119	1.58094	0.291109
C2_04120C	CAALFM_C204120CA	-0.782076	0.51935	-1.57153	0.283455	-1.04231	0.341095	-0.477816	0.349157	0.313115
C2_04130W	CAALFM_C204130WA	-0.0975949	0.0415876	-0.150506	-0.0239152	-0.14579	-0.0273338	-0.0882977	0.250618	-0.00770782
C2_04140W	CHS5	0.243101	0.0782698	0.27459	0.187694	0.337999	0.299407	0.318937	0.149489	0.182788
C2_04150C	VMA7	0.0169895	-0.162297	0.369098	-0.0743636	0.23227	-0.197802	0.227239	-0.0302771	-0.0565599
C2_04160W	CAALFM_C204160WA	-0.657067	-0.744774	-0.774695	-0.490263	-0.369211	-0.437445	-0.385973	-0.216082	-0.124809
C2_04170C	CAALFM_C204170CA	-0.154687	-1.08094	-0.470778	-0.615834	-0.651827	-0.665247	-0.221543	-0.292542	0.0131049
C2_04180C	CAALFM_C204180CA	-0.305434	-0.757616	-0.115932	-0.579353	0.191061	-0.43984	-0.161727	-0.681147	-0.550983
C2_04190C	UGA1	-0.791526	-1.24014	0.0402571	-1.01186	-1.90999	-2.24703	-1.05287	-1.89177	-0.240929
C2_04200W	TBF1	-0.349056	0.265217	-0.567061	0.0985016	-0.414805	0.0384338	-0.174903	0.0196488	0.0182914
C2_04210W	STE4	0.715655	0.593045	1.01986	0.609122	0.595736	0.579385	0.656543	0.543266	0.364109
C2_04220C	TAF14	-0.569418	-0.546956	-0.664125	-0.381365	-0.518219	-0.314597	-0.375138	-0.182768	-0.0381908
C2_04230W	BAT21	-1.17936	-0.00635884	-0.728475	-0.336873	-0.77085	-0.689528	-1.09681	-1.1923	-0.267162
C2_04240C	HYM1	-0.258894	0.135342	-0.321462	0.0164538	-0.133989	0.00255996	-0.221327	0.167371	0.362565
C2_04250W	VPS36	-0.403911	-0.086409	-0.616556	-0.412813	-0.49513	-0.26397	-0.296385	-0.0363782	-0.0220133
C2_04260W	SSN3	0.27972	0.0845631	0.354899	0.238037	0.24325	0.324531	0.319198	0.738447	0.333293
C2_04270W	CAK1	-0.066832	0.000772629	-0.365368	0.0136113	-0.150331	0.0886309	-0.00119791	0.0562202	-0.015305
C2_04280W	CAALFM_C204280WA,RIM11	0.180464	-0.457601	0.486039	-0.264054	0.129951	0.076119	0.547511	0.650889	0.126129
C2_04300C	CAALFM_C204300CA	0.427821	-0.142276	0.109885	-0.424222	0.233092	-0.311363	0.216991	-0.0763004	-0.398288
C2_04310W	ERG10	0.6053	-0.1479	-0.0776984	-0.069709	0.185162	-0.0104697	0.323667	0.119459	-0.0278271
C2_04320W	CAALFM_C204320WA	-0.202684	-0.299871	-0.500204	-0.432306	-0.342078	-0.132458	-0.241489	-0.125764	-0.109035
C2_04330C	CAALFM_C204330CA	0.0369909	0.0590966	0.301446	0.213172	0.386186	0.148908	0.0395315	-0.235248	-0.221771
C2_04340C	CAALFM_C204340CA	-1.05334	-0.491631	-0.39168	-0.716205	-1.06324	-1.37417	-0.994224	-1.34102	-0.895824
C2_04350C	SUV3	-0.789623	0.171003	-1.74487	0.156898	-0.876217	0.243791	-0.591836	0.0918937	0.200614
C2_04360W	CAALFM_C204360WA	-0.0867225	0.155572	-0.0889212	0.0971408	-0.00830467	0.204955	-0.0808789	0.0733906	0.00427483
C2_04370W	CAALFM_C204370WA	-0.621789	-0.747232	-1.11248	-0.595333	-0.39993	-0.326303	-0.569413	-0.606374	-0.25291
C2_04380C	CAALFM_C204380CA	-0.297505	-0.169921	-0.477635	0.052337	-0.25718	0.136296	-0.266885	-0.0426308	0.116523
C2_04390W	CAALFM_C204390WA	0.137391	-0.0997353	0.0827174	0.0162068	0.0620106	0.040801	0.252022	0.0251963	-0.223746
C2_04400W	CAALFM_C204400WA	-0.427853	0.239994	-0.0338669	-0.131986	0.103318	-0.107266	-0.32601	-0.337527	-0.138394
C2_04410W	CAALFM_C204410WA	0.594038	0.0955549	0.749314	0.0847253	0.567193	0.203019	0.597442	0.108087	-0.260579
C2_04420W	IFA4	0.457117	0.50251	0.0966666	0.784354	-0.30161	0.516527	0.353212	0.854396	0.18349
C2_04430W	CAALFM_C204430WA	0.575252	1.56038	0.473423	0.674862	-0.060046	0.500845	1.06272	0.0800874	0.339226
C2_04440W	CAALFM_C204440WA	0.617075	1.45985	0.689875	1.41658	0.60689	1.33789	0.514515	0.577814	0.9279
C2_04450W	CAALFM_C204450WA	0.33224	0.903878	0.592382	0.986125	0.376635	0.75743	0.335647	-0.101239	0.0621315
C2_04460W	LYS22	-2.6763	0.66425	-0.189654	0.123016	-1.85664	-0.399542	-2.01912	-1.1197	-0.0493581
C2_04470W	ADH3	1.9878	1.51515	2.8929	1.34863	3.00451	1.00954	2.11253	1.19581	0.00717184
C2_04480W	CAALFM_C204480WA	1.30185	0.825669	2.79047	1.23187	1.42901	0.501366	1.54816	0.930525	-0.323729
C2_04490W	CAALFM_C204490WA	-0.151013	-0.293292	0.0240446	-0.130812	0.203524	-0.0659292	-0.106345	-0.180263	0.0423965
C2_04500W	CAALFM_C204500WA	-0.16305	-0.790159	-0.221538	-0.361705	-0.0688322	-0.579883	-0.101683	-0.500941	-0.258952
C2_04510W	RIM2	-0.988148	-0.272917	-1.91159	-0.391515	-1.15076	-0.375812	-0.935527	-0.328797	-0.0194121
C2_04520C	CAALFM_C204520CA	0.181899	0.553383	0.0957614	0.721116	0.0825203	0.725506	0.255988	0.607977	0.469176
C2_04530W	MED8	-0.0467346	-0.194603	-0.228161	-0.138069	0.0137396	-0.137481	0.0179521	0.039538	-0.155307
C2_04540C	GDT1	-0.176392	-0.326011	-0.234399	-0.403143	-0.185837	-0.374355	-0.291628	-0.61027	-0.186812
C2_04550C	NDH51	-0.721623	-1.35225	-1.46179	-0.477701	-1.19141	-0.607013	-0.54933	-0.25587	0.0333235
C2_04560W	KTR2	-0.452163	-0.404523	-0.760948	-0.591177	-0.414537	-0.522602	-0.381716	-0.539282	-0.650225
C2_04570W	CAALFM_C204570WA	-0.755479	0.0718032	-1.40677	0.107768	-0.919659	0.100994	-0.648883	0.0318458	0.0336373
C2_04580W	ERG20	-0.253006	0.020345	-0.176236	0.668795	-0.280322	-0.00675444	0.0259946	0.186652	-0.0897068
C2_04590C	QCR8	-0.792896	-1.29408	-1.33919	-0.612989	-1.0648	-0.717947	-0.691757	-0.549456	-0.13393
C2_04600C	RPL17B	-0.913845	-0.701935	-1.53164	-0.389513	-0.761097	-0.328125	-0.81577	-0.624204	0.028284
C2_04610C	CAALFM_C204610CA	0.430652	-2.36471	-2.06965	-0.498835	-1.15286	-1.50771	0.855882	-1.38853	-1.26535
C2_04620W	CAALFM_C204620WA	0.161609	0.010918	0.004447	-0.0774435	-0.0503143	0.0540482	0.309657	0.161988	-0.013674
C2_04640C	SNU114	-0.302543	0.155519	-0.697852	0.0288197	-0.3458	0.220877	-0.225732	0.037638	0.11448
C2_04650C	RPB4	-0.789898	-0.918046	-1.44714	-0.790235	-0.864294	-0.64069	-0.727719	-0.741718	-0.420641
C2_04660C	YAK1	0.282683	-0.200849	0.629424	-0.201628	-0.0661492	-0.0382844	0.438936	0.385319	0.168105
C2_04670W	CAALFM_C204670WA	0.059785	-0.634689	-0.592493	-0.503633	-1.49061	-0.853246	-0.389416	-0.667909	-0.723114
C2_04680W	TIM17	-0.830476	-0.427792	-1.15108	-0.0985965	-0.837192	-0.435314	-0.525206	-0.24839	0.125593
C2_04690C	TPO5	-0.105019	0.257165	-0.497183	0.185913	-0.143158	0.0749756	-0.14028	-0.080252	0.0515184
C2_04700C	CAALFM_C204700CA	-0.206159	0.507517	-1.02691	0.200928	-0.579557	0.229407	-0.177318	0.0139672	0.0526941
C2_04710C	URE2	-0.512578	-0.785933	-0.523239	-0.648448	-0.309593	-0.588347	-0.37345	-0.635349	-0.417966
C2_04720C	FGR51	0.934207	0.982669	0.962337	0.722995	0.770566	0.768734	0.975695	0.807493	0.139463
C2_04730W	CAALFM_C204730WA	-0.20124	0.09234	-0.551813	-0.270067	-0.268117	-0.177188	-0.156115	-0.0501248	-0.276565
C2_04740C	CAALFM_C204740CA	0.612617	-0.135066	0.250249	-0.303733	0.706455	-0.119886	0.263091	0.0499093	0.0451881
C2_04750W	CAALFM_C204750WA	0.496861	0.620203	0.330762	0.324658	0.244667	0.317695	0.573543	0.555948	0.416428
C2_04760W	KIC1	0.280706	0.63179	0.0708936	0.243202	0.00388215	0.298025	0.374605	0.331864	0.241112
C2_04770W	CAALFM_C204770WA	0.166455	0.519825	-0.134708	0.404964	-0.0664136	0.722957	0.433895	0.429633	0.463821
C2_04780W	CAALFM_C204780WA	0.0458924	-0.184487	-0.127601	0.111354	-0.0448558	0.181352	0.138855	0.238355	0.158573
C2_04790C	CAALFM_C204790CA	-0.831321	-1.02994	-1.52623	-0.760787	-0.737305	-0.633558	-0.749084	-0.652319	-0.256897
C2_04800C	MDM10	0.0362277	0.380149	-0.0273758	0.380929	-0.0780982	0.267855	0.238397	0.271643	0.196679
C2_04810W	HIS3	-1.02382	-0.435457	-0.941212	-0.294634	-1.09606	-0.657029	-0.851235	-0.76347	0.130691
C2_04820W	CAALFM_C204820WA	-0.8541	-0.192493	-1.78057	-0.0287564	-0.971134	-0.0428773	-0.712592	-0.109992	0.0603375
C2_04830W	CAALFM_C204830WA	0.016531	0.334714	-0.159744	0.252445	-0.662315	-0.0707733	-0.213886	-0.244059	-0.378178
C2_04850C	CAALFM_C204850CA	-0.09992	-0.308505	0.113595	-0.249721	-0.0752836	-0.194128	-0.0468974	-0.244826	0.203759
C2_04860W	PZF1	-0.680083	-0.0377776	-1.39221	-0.180526	-0.979421	-0.214524	-0.523555	-0.300057	-0.166354
C2_04870C	CAALFM_C204870CA	-0.205543	-0.0417724	-0.427127	0.10502	-0.216744	0.112696	-0.0954415	0.0732163	0.0767462
C2_04880C	ARH2	0.0729142	0.219614	-0.163641	0.307313	-0.0309849	0.318839	-0.0917147	0.254395	0.0857767
C2_04930C	CRK1	-0.440608	0.14113	-0.519209	-0.0346032	-0.111484	-0.0929749	-0.307726	0.136741	-0.0816312
C2_04940C	ITR1	0.676376	-1.50215	3.05911	1.47705	0.249426	-1.76147	0.125865	-1.63379	-0.111957
C2_04950C	CYT1	-0.919786	-1.3145	-1.66462	-0.582132	-1.22317	-0.64835	-0.619531	-0.286428	-0.0712236
C2_04960C	CAALFM_C204960CA	-0.437717	-0.188195	-0.468138	-0.0829726	-0.284878	-0.167007	-0.314675	-0.124364	-0.199949
C2_04970W	ABP2	1.9268	0.956893	2.38387	0.843514	1.77524	1.13225	1.88878	1.40942	-0.0675331
C2_04980C	CKA2	-0.435809	-0.0276251	-0.706899	-0.0503538	-0.431638	-0.20757	-0.307439	-0.088598	-0.00237058
C2_04990W	CAALFM_C204990WA	-0.344034	-0.268557	-0.124757	-0.301421	-0.1718	-0.405131	-0.245376	-0.161776	-0.261229
C2_05000C	MRPL10	-1.24917	-1.34035	-1.91467	-0.829417	-1.01382	-0.848176	-1.03007	-0.876128	-0.365529
C2_05020W	CAALFM_C205020WA	-0.448059	-0.268536	-0.450412	-0.109031	-0.284811	-0.172421	-0.249662	-0.0978861	-0.046406
C2_05030C	RHO3	0.326074	-0.0104551	0.521264	-0.00657088	0.5302	-0.174571	0.405413	-0.264176	-0.37279
C2_05040C	CAALFM_C205040CA	0.214629	0.275884	0.00629738	0.224026	0.181376	0.0829353	0.143774	0.0715123	-0.0298545
C2_05050C	CAALFM_C205050CA	0.0840126	0.357719	-0.425572	0.26827	-0.0910345	0.227444	-0.1238	0.201982	0.154677
C2_05060C	CAALFM_C205060CA	2.44004	-1.35856	1.2657	-2.03152	1.43209	-1.88268	0.888982	-1.97748	-2.68534
C2_05070W	FRE9	1.74413	3.4651	2.99135	1.74568	2.85623	1.48638	1.71159	2.0169	0.18199
C2_05080C	CAALFM_C205080CA	-0.477846	0.410242	-1.14169	0.528672	-0.49977	0.595595	-0.280113	0.364682	0.417823
C2_05090W	MAK5	-0.704038	0.461879	-1.34018	0.388392	-0.778977	0.448428	-0.508379	0.400327	0.486028
C2_05100C	ERF1	-0.688986	-0.305441	-0.982141	-0.17904	-0.447193	-0.0137145	-0.498669	-0.107707	0.0478654
C2_05110W	LEM3	-0.0608529	0.0335875	-0.186243	0.0357653	0.00767415	0.0601043	-0.0591955	0.031464	-0.0126418
C2_05130W	CAALFM_C205130WA	1.52676	0.931945	2.29032	0.109749	1.18091	0.183588	1.67947	0.890834	-0.571779
C2_05140W	CDC15	0.415692	0.351043	0.743684	0.296139	0.473747	0.339933	0.485289	0.370853	0.146964
C2_05150W	PEX2	0.0820062	-0.284887	0.383044	-0.265102	0.0960065	-0.176303	0.395372	0.110928	-0.123242
C2_05160C	CAALFM_C205160CA	-0.911109	0.358471	-1.77489	0.174973	-1.04405	0.368536	-0.718329	0.156945	0.300722
C2_05170W	CAALFM_C205170WA	-0.174032	-0.198201	-0.42126	-0.44583	-0.210103	-0.436323	-0.266222	-0.642078	-0.446516
C2_05180W	WH11	3.88923	0.164415	2.52971	1.28102	-0.0701229	0.959607	4.22796	3.29089	1.34739
C2_05190W	CDC21	-0.107848	-0.380268	-0.238165	-0.2787	-0.192039	-0.457932	-0.163442	-0.281004	-0.371077
C2_05200C	SGO1	0.300137	-0.0567843	0.419562	0.0853681	0.432937	0.143344	0.346285	0.214631	-0.0939263
C2_05210W	DAD2	0.169348	-0.331401	0.411304	-0.152969	0.382534	-0.164483	0.213509	-0.383947	-0.296848
C2_05220C	CAALFM_C205220CA	-0.509807	-0.111697	-0.680168	-0.0717314	-0.450864	-0.0736986	-0.41549	-0.095268	-0.104388
C2_05230C	RPF2	-0.705145	0.152864	-1.46649	0.0363049	-0.626393	0.16729	-0.533362	-0.0629746	0.0452047
C2_05250C	AAT1	0.0357365	0.11162	-0.303665	0.505045	0.405188	0.634182	0.614134	1.16078	0.106734
C2_05260W	BUD14	0.702069	0.875268	0.812915	0.464898	0.49088	0.355829	0.538912	0.239188	0.224125
C2_05270W	CAALFM_C205270WA	-0.490815	0.408165	-1.19054	0.305903	-0.553541	0.353716	-0.51955	0.258971	0.336372
C2_05280C	GPI19	0.53591	0.00821326	0.6984	0.12841	0.500263	0.0445192	0.62756	0.607342	0.210733
C2_05290C	CAALFM_C205290CA	-0.242089	-1.11251	-0.603084	-0.812601	-0.0990964	-0.801915	-0.245233	-0.791627	-0.649064
C2_05300C	CAALFM_C205300CA	-0.93921	-0.86217	-1.3551	-0.470628	-0.773592	-0.579027	-0.755367	-0.475244	-0.251943
C2_05320W	CDC7	0.134079	-0.294526	-0.0804091	0.00366109	0.000110787	-0.189702	0.107064	-0.178926	-0.135625
C2_05330C	CAALFM_C205330CA	-0.169685	-0.00463116	-0.433729	-0.110381	-0.328972	-0.458073	-0.200368	-0.451061	-0.735509
C2_05340C	RPC40	-0.736128	-0.050832	-1.43647	-0.0277245	-0.726209	0.0634039	-0.60355	-0.104583	0.0784966
C2_05350C	CAALFM_C205350CA	0.225181	-0.0500172	0.21398	-0.517821	0.145512	-0.515516	0.0962709	0.000702929	-0.399574
C2_05360C	BIO32	0.454399	1.47629	2.8758	0.820276	0.0666087	0.406234	0.533347	0.332706	-0.521075
C2_05370C	RXT3	-1.3525	-0.993866	-1.33976	-0.954075	-1.18883	-1.03693	-1.09412	-0.642266	-0.43587
C2_05380W	CAALFM_C205380WA	-0.618017	-0.0510442	-0.426868	-0.234223	-0.426952	-0.261162	-0.450718	-0.363211	-0.120681
C2_05390C	CAALFM_C205390CA	0.0432138	-0.260447	0.259144	0.206641	0.135138	0.0844864	-0.260387	-0.01709	-0.196233
C2_05400W	CAALFM_C205400WA	0.00685056	-0.812295	-0.428773	-0.558284	0.223411	-0.463371	-0.382876	-0.640329	-0.782344
C2_05410W	CAALFM_C205410WA	-0.726976	-0.821187	-1.08539	-0.397743	-0.525401	-0.391675	-0.679014	-0.54651	-0.0232909
C2_05420C	CAALFM_C205420CA	0.00227736	-1.7432	-1.97826	-1.26861	-0.572898	-2.62991	-0.88792	-2.60292	-2.1803
C2_05440W	PEX6	0.388282	-0.638164	0.66281	-0.0829775	0.0426272	-0.0127364	1.03706	1.33127	-0.057041
C2_05450C	MDJ2	-1.09585	-0.669871	-1.81916	-0.420243	-1.04978	-0.278743	-0.789956	-0.102573	0.0725077
C2_05460W	CDC19	-0.0159698	0.465146	-0.517322	0.261712	0.169162	0.291665	-0.900485	-1.19929	-0.250117
C2_05470W	COQ5	-0.873529	-1.01559	-1.51775	-0.618611	-0.882927	-0.463465	-0.715973	-0.266494	-0.0950103
C2_05480C	CAALFM_C205480CA	-0.340985	-0.289271	-0.0351653	-0.0433599	0.0126002	-0.109674	-0.271501	0.0678806	0.0746154
C2_05490W	CAALFM_C205490WA	-0.585409	0.00155739	-0.475219	-0.270065	-0.282422	-0.301006	-0.45417	-0.0414034	-0.223027
C2_05500W	ATP4	-0.826721	-1.09088	-0.945613	-0.988941	-0.485936	-0.918633	-0.654293	-0.714094	-0.434372
C2_05510C	CAALFM_C205510CA	0.0783804	-0.200277	0.077847	-0.0264988	0.238151	0.0260532	0.178353	0.157602	-0.111374
C2_05520W	CAALFM_C205520WA	-0.905202	-0.366566	-1.01606	-0.221483	-0.725477	-0.198453	-0.778421	-0.218666	0.0072544
C2_05530C	CAALFM_C205530CA	-0.436279	-0.0663416	-0.476599	-0.203698	-0.229366	-0.133689	-0.281387	-0.120653	-0.0309795
C2_05540C	CAALFM_C205540CA	-0.223899	0.0507242	-0.309802	0.151433	-0.135156	0.124206	-0.175293	0.173494	0.120613
C2_05550W	CAALFM_C205550WA	0.336155	-0.0394034	0.630594	0.412545	0.557329	0.308441	0.332735	-0.120973	-0.0731359
C2_05560W	CAALFM_C205560WA	0.0999823	-0.161789	0.382395	-0.16696	0.341391	-0.0766112	0.229746	-0.0138704	-0.127
C2_05570C	CAALFM_C205570CA	1.37805	0.936742	1.51719	1.16052	0.97793	1.14087	1.27546	1.33925	0.160013
C2_05580W	CAALFM_C205580WA	0.605861	0.895537	0.400233	0.39718	0.156508	0.211064	0.506475	0.290991	0.216598
C2_05590C	CAALFM_C205590CA	-0.259905	-0.554987	-0.407469	-0.434023	-0.257064	-0.222292	-0.342108	-0.641004	-0.202161
C2_05600W	CAALFM_C205600WA	1.77506	-0.688958	NAME?	-0.519812	0.916969	-0.528376	1.24465	NAME?	#NAME?
C2_05610C	RPS8A	-0.925251	-0.789273	-1.55197	-0.537156	-0.604772	-0.429747	-0.851836	-0.59839	-0.0412985
C2_05620W	KTI11	-0.209827	0.306252	-0.514867	0.309106	-0.198624	-0.0668506	-0.272264	-0.796916	-0.23472
C2_05640W	CAALFM_C205640WA	-0.219487	0.0804049	-0.227725	0.395023	-1.47504	-0.646759	0.384864	1.63663	0.799621
C2_05650W	VPS35	0.0620975	-0.136913	0.138957	-0.133274	0.117025	0.060786	0.18497	-0.025004	0.0075398
C2_05660W	PNG2	0.573717	0.750076	0.0650389	0.108406	0.0320793	0.0689131	0.669185	0.085757	0.154147
C2_05670C	CAALFM_C205670CA	-0.520281	0.134842	-0.985603	0.202805	-0.503921	0.144483	-0.484908	-0.110818	0.174856
C2_05680W	COG4	-0.202205	-0.109148	-0.303031	0.0512273	-0.145141	-0.0202566	-0.0618765	-0.0155447	0.138971
C2_05690C	YTH1	0.0524898	-0.55957	-0.534773	-0.572477	-0.422033	-0.547838	-0.0665229	-0.156677	-0.0288737
C2_05700W	OSM1	2.39677	0.181064	0.54443	0.33792	0.591554	-0.134715	1.43078	0.369988	-0.274679
C2_05710C	CAALFM_C205710CA	-1.24965	-1.32571	-1.7767	-1.07832	-0.881029	-0.98124	-1.10315	-1.06308	-0.388336
C2_05720C	CAALFM_C205720CA	-0.325655	-0.077173	-0.189197	0.020664	-0.101384	-0.0161456	-0.14334	-0.192353	-0.089935
C2_05730C	GWT1	-0.4445	-0.765707	-0.33206	-0.329304	-0.0873649	-0.423741	-0.304434	-0.361768	-0.294459
C2_05740W	SPO7	-0.109655	-0.011374	0.00797843	-0.344722	-0.169732	-0.451272	-0.218659	-0.292641	-0.429403
C2_05750W	CAALFM_C205750WA	-0.828155	0.56811	-1.69475	0.306137	-1.16886	0.351842	-0.610625	0.347165	0.284745
C2_05760C	CAALFM_C205760CA	-0.540026	-1.25954	-0.925885	-0.764673	-0.748092	-0.794688	-0.388709	-0.346233	-0.356541
C2_05770W	CAALFM_C205770WA	1.2123	0.359252	0.821873	0.391268	-0.562363	-0.410755	1.15564	0.461987	0.838868
C2_05780C	MKK2	1.09123	0.938379	0.931017	0.276773	0.986525	0.405121	0.894082	-0.117269	-0.307054
C2_05790C	RFC1	-0.18116	0.1929	-0.279517	0.313807	0.020653	0.533025	-0.0638307	0.268537	0.18741
C2_05800C	CAALFM_C205800CA	-0.145824	-0.00301315	-0.0878373	0.0423712	0.114626	0.225578	0.0575464	0.147086	0.238732
C2_05810W	CAALFM_C205810WA	0.276766	0.952349	0.185926	0.422326	0.0524009	0.333457	0.508776	0.478425	0.220945
C2_05820W	CAALFM_C205820WA	0.134419	0.208876	-0.268569	0.224096	-0.239817	0.0772622	0.0684558	0.173099	0.0565303
C2_05830C	CAALFM_C205830CA	-0.166028	0.954551	-0.811296	0.878321	-0.527279	0.875678	0.00966697	0.76567	0.719964
C2_05840W	CAALFM_C205840WA	-0.688555	0.310117	-1.28423	0.204543	-0.749534	0.278196	-0.546447	0.268864	0.176106
C2_05850C	CAALFM_C205850CA	0.106665	0.0963544	0.321685	0.187559	0.199333	0.116452	0.245755	0.157962	0.116425
C2_05860C	CAALFM_C205860CA	0.350577	-0.397423	-0.0581175	-1.02227	-0.0668407	-0.858223	-0.0805858	-0.785852	-0.237446
C2_05870W	CAALFM_C205870WA	0.469499	-0.592892	1.03556	0.118848	0.815999	0.0115824	0.386765	0.00166566	-0.341903
C2_05890C	IDP1	-0.971684	0.764698	-0.899455	-0.399105	-0.2365	-0.233803	-0.571669	-0.603431	-0.363701
C2_05900W	CAALFM_C205900WA	0.0158812	2.07161	-0.379633	1.34451	-0.561232	0.923006	0.620645	1.32611	1.36405
C2_05910W	CAALFM_C205910WA	0.0331334	0.0756847	-0.00783471	-0.552975	-0.0366468	-0.186246	0.0291489	-0.284178	-0.284172
C2_05920C	COX8	-0.344653	-0.876401	-0.570793	-0.55915	-0.765284	-0.721278	-0.261528	-0.18458	-0.166269
C2_05930W	COX9	-0.212417	-0.603742	-0.481015	-0.283297	-0.479045	-0.38303	-0.251362	-0.0202242	-0.0499895
C2_05940C	VPS33	0.398162	-0.0721266	0.666052	-0.119001	0.545026	-0.112495	0.381384	0.23135	-0.0770395
C2_05950C	TES15	1.70628	0.467089	3.15225	0.804789	0.902424	0.664782	1.8594	1.45623	-0.23278
C2_05960C	CAALFM_C205960CA	-0.625778	0.152991	-0.67645	0.138206	-0.406567	0.11781	-0.438504	0.0659913	0.0784315
C2_05970C	TES1	-0.210352	-0.2378	-0.356538	-0.325823	-0.472229	-0.56113	-0.040263	0.297119	-0.32204
C2_05980C	CAALFM_C205980CA	-0.450538	-0.589796	0.00190244	-0.445166	-0.288787	-0.755316	-0.0988004	-0.0303952	-0.292193
C2_05990C	CAALFM_C205990CA	1.57687	0.265065	2.85111	0.43431	-0.0574323	0.103506	1.70422	1.27895	-0.427974
C2_06000W	LAS1	-0.53108	-0.000639592	-1.03236	-0.0970441	-0.461096	-0.0457974	-0.459413	-0.223057	-0.0769471
C2_06010W	SPO72	0.373359	0.923503	0.969953	0.340925	0.369223	0.385464	0.417644	0.493183	0.153963
C2_06020W	CNT	-0.17213	0.169142	-1.09606	0.140764	-0.03003	0.660097	0.119022	0.865588	0.304143
C2_06030W	CAALFM_C206030WA	0.0242583	-0.0521791	0.211663	-0.133875	0.229378	-0.112521	-0.00386414	-0.168211	-0.251455
C2_06040C	CAALFM_C206040CA	-0.682576	-0.618988	-0.149618	-0.227697	-0.306122	-0.258413	-0.550303	-0.114875	0.0597522
C2_06070W	FAA2-1	2.0071	0.77319	3.04525	0.921828	0.95664	0.777887	2.32081	2.21064	0.151542
C2_06080C	CAALFM_C206080CA	-0.144268	-0.0646689	-0.223653	-0.0308207	-0.190146	-0.00358197	-0.0580966	-0.0593589	0.00371884
C2_06090W	CAALFM_C206090WA	0.225096	0.609953	0.32209	0.219543	0.223932	0.266533	0.113507	0.543479	0.250748
C2_06100W	PMT4	0.176997	-0.26107	0.191612	0.200055	0.556398	0.0887569	0.242357	-0.025722	-0.168759
C2_06110W	CAALFM_C206110WA	-0.670383	-0.185224	-0.780228	-0.0848021	-0.564953	-0.124123	-0.446696	-0.0578964	-0.00778732
C2_06120C	CAALFM_C206120CA	-0.345437	0.604103	-0.696222	0.231583	-0.398693	0.319217	-0.313827	0.261063	0.0854212
C2_06130W	CSM3	0.128738	-0.123156	0.142571	-0.0741447	0.235611	-0.0768386	0.176047	0.159393	-0.0621194
C2_06140C	CAALFM_C206140CA	0.187648	0.143927	-0.225104	-0.0513683	0.200508	0.104453	0.595621	0.585933	-0.177487
C2_06150C	RPN10	-0.22008	-0.673614	-0.0317551	-0.572253	-0.09784	-0.626422	-0.157834	-0.636479	-0.355232
C2_06160W	CAALFM_C206160WA	0.328107	-0.435094	0.7353	0.302523	0.689636	0.392085	0.233272	0.139199	0.249091
C2_06170C	ECM17	0.41673	2.75939	-0.89948	0.700136	-1.16521	0.223198	0.936657	1.79162	0.439723
C2_06180C	FGR12	1.04254	2.01181	NAME?	0.490542	-1.53962	NAME?	NAME?	0.77057	0.794451
C2_06190W	ILV1	-1.03326	-0.601506	-1.10349	-0.633773	-0.819482	-0.659572	-0.989857	-0.922965	-0.444648
C2_06200C	CAALFM_C206200CA	-0.624575	-0.396071	-1.00207	-0.110961	-0.563865	-0.222967	-0.450484	-0.15523	0.0910027
C2_06210C	SER1	-1.08301	-0.241508	-0.912218	0.10113	-0.333961	0.234423	-0.88795	-0.365342	0.0486821
C2_06220C	MEC3	-0.196696	0.393267	-0.126055	0.30452	-0.304315	0.203641	-0.1451	0.35389	0.103684
C2_06230W	CAALFM_C206230WA	-0.344004	0.010826	-0.767761	-0.0612656	-0.5	-0.00189439	-0.263193	0.0257934	0.162486
C2_06240W	SMD2	-0.837869	-1.21206	-0.921142	-1.0738	-0.591979	-1.111	-0.706139	-1.1817	-0.922895
C2_06250C	CDC46	-0.121992	0.258647	0.0308095	-0.0567423	-0.222055	-0.254226	-0.0599809	0.126371	0.0122136
C2_06260W	CAALFM_C206260WA	0.0539409	-0.304007	0.226023	-0.443867	0.00420605	-0.360932	-0.138025	-0.197883	-0.116638
C2_06270W	CAALFM_C206270WA	0.0885169	-0.544032	0.354158	-0.496857	0.315083	-0.476848	0.135551	-0.21366	-0.25101
C2_06280C	CAALFM_C206280CA	-0.0663585	-0.291644	0.108234	-0.0591017	0.0704984	0.0913204	0.122756	0.132031	0.0513417
C2_06290C	ATP14	-0.483292	-0.520134	-0.208765	-0.289222	-0.310556	-0.318778	-0.24343	-0.0799728	0.053626
C2_06300W	CAALFM_C206300WA	-0.276318	-0.154806	-0.17237	-0.397048	-0.276283	-0.475053	-0.0993862	0.185853	-0.0855712
C2_06310C	GSP1	-0.555143	-0.580036	-0.82795	-0.256917	-0.305091	-0.187841	-0.463856	-0.472216	-0.190817
C2_06320W	CAALFM_C206320WA	0.661504	0.229944	0.809646	0.192882	0.616466	0.144708	0.537871	-0.0593432	-0.195942
C2_06330C	AVT1	-0.0762781	0.105515	-0.257853	-0.0808043	-0.0635699	-0.299858	-0.10832	-0.0726087	-0.275991
C2_06340W	EFH1	1.10279	0.277497	0.221489	1.3277	-0.280162	0.278441	1.242	1.50572	0.275178
C2_06350C	CAALFM_C206350CA	0.786636	-0.67371	-1.38072	-0.5783	-0.0119247	-2.43372	0.934945	0.18923	-1.2612
C2_06360C	MAK16	-0.738586	0.183626	-1.65519	-0.0907634	-0.972165	-0.100059	-0.646407	-0.253725	-0.121995
C2_06370C	SCP1	0.342528	0.603086	-0.168689	0.565356	-0.141405	0.534944	0.345253	0.534833	0.165804
C2_06390C	IMH3	-0.807667	-0.341931	-1.38196	-0.150516	-0.583912	-0.0258853	-0.680372	-0.303882	0.0522297
C2_06410W	CAALFM_C206410WA	-0.181791	NAME?	-0.135241	-0.227988	NAME?	0.0819375	0.272799	NAME?	#NAME?
C2_06420C	RTS1	0.111731	-0.249512	0.255642	-0.0245951	0.266708	0.283836	0.253598	-0.0845374	0.140269
C2_06430C	CAALFM_C206430CA	0.409026	0.617162	0.308919	0.522895	0.158592	0.623078	0.224225	0.159921	0.226837
C2_06440C	CAALFM_C206440CA	0.274448	0.291146	1.31854	-0.134641	0.728569	-0.626592	0.581149	0.0192869	-0.257999
C2_06450C	CAALFM_C206450CA	1.29444	-2.66821	4.20091	-0.87378	-0.118792	-1.76846	1.02206	-0.434216	-0.7343
C2_06460W	RTA3	-1.07	0.670804	-0.658799	-0.667362	-1.9221	-0.713467	-0.810189	0.083789	0.175654
C2_06470W	RTA2	0.156828	1.02529	-1.15101	0.730029	-1.48731	-0.0838992	0.593636	0.106027	1.46565
C2_06480W	CAALFM_C206480WA	-0.623311	-0.241131	-0.940123	-0.126657	-0.463747	-0.0852121	-0.644525	-0.367093	-0.0330747
C2_06490W	CAALFM_C206490WA	0.410609	0.146482	0.441719	0.222565	0.427457	0.209654	0.376822	0.182402	-0.0588347
C2_06510W	CAALFM_C206510WA	1.20637	0.879075	1.69501	0.916537	1.10776	0.741688	1.23073	0.776031	0.0560245
C2_06520C	CAALFM_C206520CA	-0.156814	0.774218	-0.396224	0.517145	-0.694271	0.264607	0.130388	0.314576	0.132376
C2_06530W	CAALFM_C206530WA	0.573772	0.929327	0.737035	1.05726	0.190596	0.686622	0.890559	0.690301	0.187457
C2_06540C	SPF1	-0.303329	-0.296237	-0.725329	-0.257325	-0.276883	-0.227188	-0.327276	-0.283249	-0.249326
C2_06550W	CAALFM_C206550WA	1.25089	0.33502	1.28455	0.188332	0.997818	0.375407	1.0363	0.305173	-0.217758
C2_06570C	CAALFM_C206570CA	4.33072	2.08654	4.13468	2.46832	2.00904	0.355234	3.47382	1.37918	-0.602576
C2_06590C	GIT1	0.906872	3.71715	0.0794075	-0.680901	-1.63684	2.45529	0.0563565	-0.744019	0.779874
C2_06600W	CAALFM_C206600WA	0.740408	0.482792	1.05564	0.181946	0.212683	0.541854	1.10523	0.75794	0.0518796
C2_06610C	CAALFM_C206610CA	-0.334645	-1.04113	-0.521703	-1.12619	-0.269045	-0.962422	-0.439653	-1.08925	-0.923603
C2_06620W	CAALFM_C206620WA	-0.272487	-0.779506	-0.745893	-0.717986	-0.274782	-0.424369	-0.399183	-0.484959	-0.491875
C2_06630C	CAALFM_C206630CA	1.43195	2.23946	3.56439	0.797535	0.34511	-0.938601	1.04783	0.246351	-0.777529
C2_06640C	VAS1	-0.873761	-0.369216	-1.44207	-0.19156	-0.767224	-0.0961108	-0.750892	-0.307235	0.0793555
C2_06650C	CAALFM_C206650CA	-0.390236	-0.0530121	-0.754624	-0.125	-0.27896	0.0769289	-0.411472	-0.24236	-0.211159
C2_06660W	CAALFM_C206660WA	-0.550847	0.181294	-1.25139	-0.0891631	-0.677827	-0.0108067	-0.635907	-0.232635	-0.133482
C2_06670C	DBF2	0.0350858	-0.935254	0.339797	-0.706476	-0.0700516	-0.666407	0.0669661	-0.409704	-0.458041
C2_06680W	FRP3	1.61837	-0.502695	3.67855	-0.193391	0.40475	-0.979204	1.74639	1.91246	-0.556906
C2_06690C	PEX22	0.261753	0.0875335	0.649731	0.198905	-0.083315	-0.188798	0.138494	0.527471	-0.515269
C2_06700W	AMO2	0.147159	2.36956	0.0118445	0.216806	0.0357055	0.412944	1.30127	0.696022	-0.402302
C2_06710W	CAALFM_C206710WA	-0.0536635	-1.03019	0.330152	-0.762893	-0.646327	-1.08086	0.521409	0.464087	-0.26269
C2_06720W	GRE2	1.95704	0.984819	1.33063	0.327311	0.429884	0.173549	1.69383	1.28943	-0.0487036
C2_06730W	LSP1	0.683982	0.575966	0.583551	0.0685764	0.254612	-0.0200616	0.728372	0.328676	-0.102698
C2_06740W	CAALFM_C206740WA	0.761411	0.281302	0.999967	0.281509	0.294806	0.182199	0.719373	0.706959	0.107799
C2_06750C	CAALFM_C206750CA	-0.794014	-0.88877	-1.49995	-0.686879	-0.655353	-0.683495	-0.892308	-0.745946	-0.431279
C2_06760C	CAALFM_C206760CA	0.638775	-0.0941966	0.728759	-0.261918	0.201813	0.244238	0.668153	0.74365	-0.112659
C2_06770W	CAALFM_C206770WA	0.11316	-0.383679	-0.302213	-0.347629	-0.012468	-0.0660713	0.196764	-0.0256836	-0.124211
C2_06780C	CAALFM_C206780CA	0.00573389	0.299984	0.120844	0.37154	-0.116034	0.231954	0.0942361	0.504088	0.223371
C2_06790W	CAALFM_C206790WA	-0.645278	-0.464462	-0.858175	-0.701812	-0.344377	-0.644969	-0.581741	-0.7663	-0.6155
C2_06800C	CAALFM_C206800CA	-0.0383607	-0.308577	-0.203652	-0.362502	-0.184723	-0.303763	-0.11665	0.0629418	-0.325796
C2_06810C	RPL11	-1.04425	-1.14517	-1.40807	-0.770113	-0.761122	-0.720686	-0.919684	-0.949196	-0.319161
C2_06820C	PRE2	-0.219477	-0.483692	-0.245882	-0.385197	-0.122012	-0.380587	-0.0803955	-0.422184	-0.31719
C2_06830C	FHL1	-0.404221	0.381166	-0.868454	0.11421	-0.64651	0.12538	-0.312147	0.184534	0.182089
C2_06840W	SPR1	-0.463743	-1.72198	-1.32862	-0.085463	-1.38731	-0.700582	-0.693191	-0.211398	-0.175964
C2_06850W	CAALFM_C206850WA	-0.536448	-0.0232916	-1.37442	-0.0314141	-0.596825	0.277152	-0.553538	-0.142076	0.116313
C2_06860W	LTE1	0.508004	0.305912	0.450474	0.475885	0.157329	0.214201	0.483649	0.357646	0.171381
C2_06870C	PST1	3.68371	2.00062	4.45913	1.16823	2.81431	1.23291	3.33368	1.28944	0.0125637
C2_06880C	PRB1	0.594205	0.986518	1.71419	-0.179638	0.219948	-0.286149	0.382563	-0.0239607	-0.168408
C2_06890C	CAALFM_C206890CA	-0.704763	0.206754	-0.596606	-0.752837	-0.611092	0.651203	-0.723564	-0.804427	0.131361
C2_06910W	YPT72	-0.138611	-0.156304	-0.0577876	-0.482598	-0.0437989	-0.383745	-0.165174	-0.372236	-0.299371
C2_06920C	CAALFM_C206920CA	0.157804	0.332545	0.24766	-0.0519651	0.416557	0.16901	0.0842964	-0.308869	-0.263317
C2_06930C	CAALFM_C206930CA	0.639699	1.68429	-0.365333	-0.164939	1.23741	0.802867	0.463726	-0.0983984	0.373384
C2_06940C	ARE2	1.3014	0.88012	1.25348	0.44919	1.07869	0.452851	0.768418	0.624657	0.11369
[truncated: 4,032 more rows]
