# Supplementary material for: Filamentation Involves Two Overlapping, but Distinct, Programs of Filamentation in the Pathogenic Fungus Candida albicans
Source: G3 (Bethesda). 2017 Sep 25;7(11):3797–808. doi: 10.1534/g3.117.300224 (PMC5677161; doi:10.1534/g3.117.300224)
Supplement: Supplementary file 15 [file 3797TableS5.xlsx]

## Sheet: Sheet1
ORF	FL-log2(fold_change)	FS-log2(fold_change)	LL-log2(fold_change)	LS-log2(fold_change)	RL-log2(fold_change)	RS-log2(fold_change)	SL-log2(fold_change)	SS-log2(fold_change)
C4_03570W	10.2576	9.63555	10.6524	7.78867	9.80719	7.99972	9.6016	4.86433	Upregulated in all		Statistically significant upregulation (2-fold or higher)
C4_00130W	8.31534	9.11577	9.6446	6.61401	8.29036	5.17398	8.00561	7.8841	Upregulated in all		Statistically significant Downregulation (2-fold or lower)
CR_06670W	8.39839	8.16166	8.77869	7.17689	8.20189	6.2744	8.10107	5.80312	Upregulated in all		Upregulated in all are upregulated in all conditions
C1_13100W	7.91442	8.99903	8.46554	8.45498	5.28232	6.67119	7.46547	6.29794	Upregulated in all		Downregulated in all are downregulated in all conditions
C4_00120W	7.16901	8.28766	8.68583	4.72904	6.90051	2.81269	6.80094	6.28924	Upregulated in all		Upregulated in liquid only were only upregulated in liquid conditions
C2_00680C	8.17516	6.84579	6.01866	1.84154	8.41688	6.83958	7.81465	4.91502	Upregulated in all		Downregulated in liquid only were only downregulated in liquid conditions
CR_07070C	6.82578	7.26305	7.30913	5.47678	6.94407	5.27148	6.43862	2.39457	Upregulated in all		Upregulated in liquid+ were upregulated in liquid conditions and between 1-3 solid conditions
C6_03850C	7.03689	6.22194	7.29304	5.58932	5.86676	4.0093	6.73567	5.14963	Upregulated in all		Downregulated in liquid+ were downregulated in liquid conditions and between 1-3 solid conditions
C4_00110C	5.5241	7.62182	6.95298	5.11257	5.83754	3.7568	5.43636	6.15592	Upregulated in all		Upregulated in solid only were only upregulated in solid conditions
C4_01940W	4.16451	7.7257	1.85288	3.40465	4.98757	7.98901	4.88146	6.74381	Upregulated in all		Downregulated in solid only were only downregulated in solid conditions
C4_03520C	4.55073	5.59551	5.56042	6.37098	5.44913	5.29534	4.78451	3.84597	Upregulated in all		Upregulated in solid+ were upregulated in liquid conditions and between 1-3 solid conditions
C1_13450W	8.23009	4.82781	7.66302	3.55247	2.64466	2.08862	7.45422	2.1802	Upregulated in all		Downregulated in solid+ were downregulated in liquid conditions and between 1-3 solid conditions
CR_10790W	7.46282	3.55644	7.43013	2.52128	3.34588	1.97763	6.54053	5.12455	Upregulated in all
C6_03030W	7.40175	5.01425	8.02534	2.89636	4.19297	1.18087	7.0687	1.14378	Upregulated in all
C1_13430C	4.60329	5.47413	6.61232	3.47473	4.07407	3.1407	4.27024	3.83183	Upregulated in all
C1_13480W	5.47496	3.1434	5.64946	2.96751	4.32945	2.72572	5.67807	4.04885	Upregulated in all
C7_00870W	4.79831	5.11287	5.8164	2.64724	4.5283	2.16685	4.76059	3.90962	Upregulated in all
C1_01980W	4.99941	4.28395	4.68709	2.99554	3.53157	3.3788	4.85619	4.22297	Upregulated in all
C1_00270W	5.78461	6.4152	2.31861	2.33603	3.66003	2.57305	4.74152	3.38494	Upregulated in all
C7_03150W	4.53175	4.02958	5.40701	2.92133	3.81719	3.16054	4.04672	2.79792	Upregulated in all
C1_00780C	4.66432	4.45012	4.74147	3.44464	4.26987	3.18926	4.09725	1.21621	Upregulated in all
C1_09400C	3.24783	5.21118	4.88556	2.61075	4.51373	2.26427	3.55363	3.61803	Upregulated in all
C4_05780C	1.68413	4.84454	4.01663	2.85893	5.48302	5.10706	2.56799	3.22756	Upregulated in all
C1_08330C	4.16375	3.22034	7.5497	2.25911	2.75061	2.20345	4.00485	3.62631	Upregulated in all
C1_05140W	3.85167	4.93758	3.94523	4.35957	2.73628	3.14025	3.54623	2.743	Upregulated in all
CR_03890W	4.51375	4.02146	4.40323	2.79141	4.29747	3.16959	3.85112	2.20249	Upregulated in all
C6_00840W	3.89373	4.42428	4.72381	4.48858	2.48861	2.45696	3.59579	2.66679	Upregulated in all
C7_00100W	2.87441	5.28713	4.75966	2.77398	4.26503	2.52216	3.11368	2.71716	Upregulated in all
C6_00440C	2.61398	4.74491	3.52231	3.48739	4.24563	3.70435	2.47486	2.70071	Upregulated in all
CR_02070C	6.7847	2.65581	2.96982	1.78928	1.92193	1.64089	5.50568	3.13022	Upregulated in all
CR_09220C	3.89112	2.99199	3.8358	2.72342	3.02823	2.4283	3.89241	3.48864	Upregulated in all
C2_07630C	4.36517	1.23645	4.63945	1.26518	3.77026	3.73399	4.0472	2.91751	Upregulated in all
C3_06450W	4.19417	3.64661	4.30715	2.56468	2.0931	1.17262	4.08813	3.69364	Upregulated in all
C1_01740W	3.43439	2.53796	6.90602	2.56773	1.82833	1.45052	4.38999	2.4559	Upregulated in all
C3_06790W	2.25167	6.23364	1.17678	2.1131	1.3623	5.96516	2.51402	3.92472	Upregulated in all
C1_06340W	2.17115	4.11498	3.13651	2.17702	5.10871	4.98353	1.82012	1.91084	Upregulated in all
C1_10240C	3.14388	3.04752	4.68487	2.11101	3.1932	1.97602	3.50395	3.09272	Upregulated in all
C7_00930W	3.78507	3.18977	3.62186	2.37218	2.69197	1.86042	3.61093	3.24925	Upregulated in all
C3_00210C	4.89319	2.48799	2.32378	1.16214	1.87648	1.01146	5.23195	5.24912	Upregulated in all
C3_01130C	4.01264	2.88861	5.18713	1.97987	1.98738	1.49842	3.78821	2.75843	Upregulated in all
C4_03000C	3.79934	3.12684	4.70083	2.56199	2.69302	1.2828	3.42483	1.93998	Upregulated in all
C7_03280C	3.48963	2.08956	4.87629	1.44963	2.56812	1.75087	3.71668	3.32738	Upregulated in all
C7_03170W	2.94721	2.59143	3.66669	2.73516	2.76937	2.52265	3.05303	2.75394	Upregulated in all
CR_08510W	3.23576	3.92421	2.02526	3.4157	3.20823	3.41208	2.1009	1.3268	Upregulated in all
C5_02630C	4.09659	2.79364	2.63451	1.69505	2.86842	3.41517	3.07398	1.89896	Upregulated in all
C2_09820W	3.35878	3.09225	4.31409	2.42879	1.88491	1.10033	3.28351	2.84134	Upregulated in all
C4_00080C	3.11994	2.19882	4.65065	2.30252	2.60881	1.87176	2.87847	2.66653	Upregulated in all
C1_00290W	4.70815	4.4182	1.89715	1.2831	2.69076	1.05765	4.10565	1.95231	Upregulated in all
CR_00090C	3.25604	2.87828	3.59027	2.43311	2.72127	1.71541	3.13229	2.25419	Upregulated in all
C2_08050C	1.62521	5.25021	2.28696	1.78407	2.62319	2.80732	2.47464	3.11932	Upregulated in all
C1_00850W	3.32345	2.9128	3.30624	2.08967	3.4989	1.99411	3.00623	1.72033	Upregulated in all
C4_04470W	2.78664	3.58455	3.35448	2.42785	2.84938	2.36423	2.71727	1.4688	Upregulated in all
C1_13470W	3.04262	2.67264	3.51449	2.39009	2.27003	1.8962	3.0224	2.62857	Upregulated in all
C4_03430W	3.2406	2.80048	4.64428	1.9278	1.76289	1.93037	2.78461	2.33143	Upregulated in all
C6_00930C	2.71419	2.70576	3.57804	1.88526	2.17701	1.64781	3.36568	3.03749	Upregulated in all
C3_06670C	2.87101	2.42272	3.40153	2.4008	3.08057	1.76921	2.88844	2.24979	Upregulated in all
C4_03710C	2.37233	5.31548	3.52314	2.20169	1.82104	1.08147	2.80569	1.74785	Upregulated in all
C2_02060C	1.91179	1.81992	5.67376	2.02279	1.52652	1.64389	2.85083	3.2775	Upregulated in all
C6_02200C	3.65315	3.52903	3.74	1.24018	2.08864	1.18184	3.17063	1.96713	Upregulated in all
C1_04020C	2.81429	2.28342	3.60207	2.00521	2.65211	1.67216	2.85606	2.64979	Upregulated in all
CR_08670C	3.10347	1.60849	3.58959	1.54842	2.04113	1.59305	3.53974	3.37314	Upregulated in all
C1_01220C	3.01904	2.80339	3.90554	1.99087	1.82583	1.33939	2.70243	2.58566	Upregulated in all
C1_02990C	2.20986	3.03345	3.04645	2.11548	2.28929	2.44763	2.17979	2.76225	Upregulated in all
CR_07150W	3.46507	2.21179	3.55812	2.17659	1.55828	1.1395	3.17436	2.75156	Upregulated in all
C3_01230C	3.07191	2.05667	3.52587	2.11765	2.35293	2.38098	2.70912	1.78878	Upregulated in all
C2_06870C	3.68371	2.00062	4.45913	1.16823	2.81431	1.23291	3.33368	1.28944	Upregulated in all
C1_04940C	2.68429	3.05273	3.26093	2.23187	1.55452	1.59701	2.88539	2.56219	Upregulated in all
C1_13160W	3.70709	2.84812	3.32942	1.83118	1.73645	1.30541	2.84647	2.14348	Upregulated in all
C1_01930W	3.00317	4.13267	3.67469	2.26925	2.00167	1.1338	2.30778	1.10153	Upregulated in all
CR_00610W	2.6618	2.4336	3.2759	1.73267	2.17766	1.93756	2.85724	2.5469	Upregulated in all
C5_03930C	2.54124	2.7217	2.82048	2.57424	2.51197	2.26361	2.34445	1.55302	Upregulated in all
C7_03310W	1.80986	2.61752	1.22328	2.49017	1.71044	2.34237	2.6597	4.40762	Upregulated in all
C1_11200W	2.92436	2.22831	2.77413	1.74464	1.95179	2.00404	2.79049	2.63169	Upregulated in all
C1_14190C	3.40433	2.07945	3.68051	1.75977	2.19357	1.42364	2.84413	1.35968	Upregulated in all
CR_09530C	2.77614	2.77949	3.16896	2.11663	2.35996	1.11382	2.47653	1.83006	Upregulated in all
C3_05810C	2.24281	2.2177	2.36421	2.22882	2.55248	2.77842	2.25002	1.85693	Upregulated in all
C3_00360W	2.04337	3.32479	1.93055	2.87545	1.07707	2.60227	2.03603	2.55695	Upregulated in all
C5_04470C	2.65243	1.83764	3.9896	2.14835	2.04538	1.70165	2.55271	1.40435	Upregulated in all
C1_00390W	1.9218	3.20245	1.75191	1.22532	2.34053	2.93542	2.19857	2.73364	Upregulated in all
CR_01910C	2.24969	2.62746	3.1583	2.68452	1.90167	1.46715	2.29278	1.81141	Upregulated in all
C2_05070W	1.74413	3.4651	2.99135	1.74568	2.85623	1.48638	1.71159	2.0169	Upregulated in all
C4_04530C	2.73039	2.27933	2.43247	1.51117	2.69991	2.08007	2.7026	1.51886	Upregulated in all
C3_06490W	2.896	1.07408	2.66866	1.36079	1.88587	1.30855	3.24972	3.04922	Upregulated in all
C5_05050W	3.84686	1.8142	1.58415	1.07882	2.7526	2.09271	2.63439	1.57584	Upregulated in all
C6_02450W	1.71202	3.31336	4.18519	1.48596	1.03122	1.21371	2.55158	1.69873	Upregulated in all
CR_05940W	2.33132	2.22198	2.30492	2.50991	1.21687	1.66985	2.28269	2.56973	Upregulated in all
C1_06130C	1.94057	2.61558	2.24412	2.38583	1.60808	2.04307	2.03393	2.15255	Upregulated in all
C5_00870C	1.90941	2.43952	2.43547	2.31951	1.71163	2.08419	2.15713	1.80846	Upregulated in all
C1_14180W	2.30646	2.96129	2.39752	1.62725	1.61538	1.78714	2.21039	1.94574	Upregulated in all
C3_07270C	2.28719	2.36544	2.66113	1.93387	1.92274	1.70553	2.33479	1.53431	Upregulated in all
C6_00860W	1.66262	2.28627	2.23348	2.60306	2.01874	2.35141	1.73732	1.6181	Upregulated in all
C1_12140W	2.27198	1.71769	3.12684	1.35714	1.71734	1.07869	2.55645	2.55803	Upregulated in all
C2_04050C	2.30613	2.59834	2.05837	2.32407	1.6195	1.48634	2.28585	1.56062	Upregulated in all
C2_03670W	1.8457	2.36939	2.78467	1.86375	1.44004	1.76917	1.92016	1.90953	Upregulated in all
CR_07490C	2.40011	1.92694	2.51086	1.95745	1.49918	1.30467	2.23856	1.99533	Upregulated in all
C7_03580C	1.94747	2.25404	2.53067	2.00672	2.02965	1.79521	1.92579	1.26703	Upregulated in all
C4_01860C	2.53873	1.94559	2.7579	1.20746	2.36475	1.56999	2.2318	1.02645	Upregulated in all
C4_04270W	1.73574	3.89867	2.39659	1.38122	1.64085	1.02158	1.72407	1.48562	Upregulated in all
C2_04470W	1.9878	1.51515	2.8929	1.34863	3.00451	1.00954	2.11253	1.19581	Upregulated in all
C3_05980C	1.89966	1.48992	2.68316	1.17851	1.33761	1.21343	2.49701	2.62431	Upregulated in all
C4_04790W	2.46529	2.80242	1.75857	1.97189	1.05586	1.88658	1.84063	1.12587	Upregulated in all
C3_03980C	1.2282	2.3675	1.97424	2.21967	1.36385	2.17364	1.51149	1.91181	Upregulated in all
C1_09340C	1.51389	2.5923	3.00659	1.21214	2.30164	1.1403	1.38579	1.13215	Upregulated in all
CR_04640W	2.06244	1.99163	1.8517	1.50572	1.42488	1.81903	1.74683	1.79659	Upregulated in all
CR_02130W	1.82062	1.75364	2.58275	1.41581	1.28937	1.58637	1.82352	1.79187	Upregulated in all
CR_06500C	1.65326	2.62187	2.75649	1.26366	1.95415	1.10407	1.44839	1.19093	Upregulated in all
C1_04930C	1.42191	1.5772	2.19323	2.15737	1.71423	1.4286	1.86273	1.48127	Upregulated in all
C1_12000C	2.04075	1.32282	1.74731	1.67885	1.33789	1.15997	2.27662	2.26145	Upregulated in all
C1_09310C	1.59262	2.2076	2.89338	1.49346	1.42028	1.49525	1.51082	1.18426	Upregulated in all
C5_00890C	2.04784	1.78	2.39112	1.09955	1.51929	1.2273	2.05488	1.62757	Upregulated in all
C4_02180C	1.4217	2.2164	2.50155	1.80679	1.61438	1.55459	1.39527	1.14663	Upregulated in all
C3_01900C	1.46726	2.62231	1.53459	1.49951	2.1449	1.74576	1.29485	1.32101	Upregulated in all
C6_04410C	1.81153	1.89377	2.23233	1.69722	1.32395	1.38141	1.69696	1.23645	Upregulated in all
C1_14030W	1.64668	1.99762	2.2018	1.44503	1.67514	1.38762	1.64964	1.22331	Upregulated in all
C2_09860C	1.65921	2.61535	1.84511	1.54699	1.0246	1.20884	1.87723	1.40934	Upregulated in all
C2_10180W	2.29139	2.46373	1.98874	1.0124	1.35276	1.43402	1.57478	1.00881	Upregulated in all
C6_04490W	1.59075	1.88543	2.04686	1.66691	1.47042	1.54382	1.60719	1.17333	Upregulated in all
C5_05450C	1.96358	1.60589	1.89643	1.5168	1.58062	1.19094	2.00125	1.16685	Upregulated in all
CR_00170W	1.45257	1.45469	2.21939	1.6276	1.86966	1.4778	1.53299	1.20153	Upregulated in all
C3_01820W	1.34355	1.67008	1.77241	2.05436	1.32015	1.49543	1.66062	1.51844	Upregulated in all
C2_07790C	1.21004	2.13616	1.7523	1.43302	1.18694	1.96304	1.36521	1.39273	Upregulated in all
C1_01810C	1.41952	1.43585	1.93664	1.37513	1.41869	1.42679	1.5723	1.46934	Upregulated in all
C1_10520W	1.46062	1.30773	1.80366	1.25503	1.00938	1.29425	1.55602	2.10108	Upregulated in all
C1_07650W	1.59347	1.73547	1.80848	1.59877	1.1066	1.40543	1.37181	1.13707	Upregulated in all
C4_04670C	1.51004	1.52726	2.24158	1.43554	1.28233	1.16821	1.35479	1.21813	Upregulated in all
C7_03470W	1.20467	1.41394	2.12317	1.17083	1.40509	1.28678	1.34625	1.20194	Upregulated in all
C7_01680C	1.18321	1.47378	1.72637	1.69179	1.08162	1.3187	1.29164	1.38201	Upregulated in all
C1_05300C	1.421	1.18457	1.61477	1.11982	1.38712	1.22014	1.41826	1.19157	Upregulated in all
C3_03410C	1.03186	1.61859	1.47676	1.26479	1.16245	1.29068	1.08908	1.2573	Upregulated in all
C7_02680W	-1.36803	-1.70052	-1.93803	-1.22661	-1.06776	-1.08687	-1.28676	-1.3555	Downregulated in all
C5_01050C	-1.30756	-1.78305	-1.85093	-1.27982	-1.00398	-1.3372	-1.22668	-1.2995	Downregulated in all
CR_08760C	-1.12551	-1.72927	-2.62858	-1.08144	-1.55416	-1.25962	-1.25155	-1.61452	Downregulated in all
C2_01740C	-1.43726	-1.78197	-2.33697	-1.41262	-1.18972	-1.31921	-1.42366	-1.42031	Downregulated in all
CR_05790C	-2.23472	-1.22856	-2.51696	-1.40235	-1.48502	-1.0753	-1.95418	-1.47728	Downregulated in all
CR_06220C	-1.17182	-1.61087	-1.51894	-2.13675	-1.17758	-1.83797	-1.03204	-2.93757	Downregulated in all
C7_03630C	-1.53713	-2.07744	-2.46809	-1.78249	-1.14145	-1.45711	-1.48099	-1.69401	Downregulated in all
C3_03710W	-1.20396	-2.66128	-2.07945	-1.38142	-2.03475	-1.71997	-1.21552	-1.61093	Downregulated in all
CR_08210C	-1.52239	-2.73492	-2.37301	-1.7369	-2.00062	-1.76192	-1.16762	-1.27224	Downregulated in all
C1_14220C	-1.58167	-1.6883	-2.74075	-2.00572	-1.48583	-1.39244	-1.71949	-2.15158	Downregulated in all
C1_08960W	-1.07369	-2.01489	-1.62182	-2.50729	-1.70202	-2.41517	-1.16269	-2.98734	Downregulated in all
C1_07330W	-2.00427	-2.16115	-2.30244	-2.27899	-2.89713	-2.41643	-1.8686	-2.55117	Downregulated in all
C5_03440W	-2.75706	-1.82844	-3.25345	-1.80108	-1.65376	-1.07646	-3.75381	-3.57019	Downregulated in all
C1_04450C	-1.15387	-3.50235	-3.33926	-2.56243	-4.23738	-4.29155	-1.16792	-1.17767	Downregulated in all
C1_00220W	-2.2555	-1.99721	-3.51151	-2.05433	-3.70457	-3.04499	-2.7247	-4.31424	Downregulated in all
C2_04010C_A	8.52246	4.56038	1.32821	6.3932	0.0752745	0.349451	-0.356514	0.545442	Upregulated in liquid only
C7_00350C	4.13449	3.75456	2.19584	3.97329	0.255377	0.468948	-1.29764	-0.795502	Upregulated in liquid only
C4_00450C_A	7.58151	1.77374	1.22758	2.34238	0.0112919	0.619855	0.609085	0.824744	Upregulated in liquid only
C3_06860C	2.65272	2.21377	1.25993	2.06401	-0.0590642	0.147607	0.194062	0.665368	Upregulated in liquid only
C6_03280W	2.43843	2.0083	1.63098	1.99453	0.929611	1.22703	1.24443	1.40129	Upregulated in liquid only
C1_10290W_A	3.45161	1.70589	1.39384	1.23859	0.312552	0.370638	0.642641	0.510552	Upregulated in liquid only
CR_09070C	2.06536	1.78445	2.058	1.86496	0.326423	-0.104127	0.353132	0.72545	Upregulated in liquid only
C3_02250C	1.92598	2.23527	1.77795	1.60335	0.33051	-0.250538	-0.466993	-0.965609	Upregulated in liquid only
C5_00100C	1.81758	2.01327	1.38353	1.80109	0.640321	0.624289	0.467451	0.745527	Upregulated in liquid only
C2_09810C	1.35652	2.47363	1.31838	1.60863	0.848934	0.696279	0.440146	0.208651	Upregulated in liquid only
C2_05130W	1.52676	2.29032	1.18091	1.67947	0.931945	0.109749	0.183588	0.890834	Upregulated in liquid only
C2_07180W	1.60927	1.90195	1.75592	1.39939	0.869392	0.209037	0.678115	0.106653	Upregulated in liquid only
CR_09060W	1.49385	1.4767	1.88467	1.54614	-0.222702	-0.846914	-0.258289	-0.0136215	Upregulated in liquid only
C4_02330C	1.34472	2.28628	1.47059	1.28363	0.283722	0.638868	0.562987	0.739301	Upregulated in liquid only
C2_08100W	1.78431	1.53675	1.26343	1.55565	0.637138	0.174899	0.908788	0.581612	Upregulated in liquid only
C1_00310W	1.48869	1.76582	1.21676	1.45963	0.88337	0.448981	0.437115	0.99873	Upregulated in liquid only
C6_03860C_A	1.47426	1.51731	1.47651	1.46217	0.778225	0.80059	0.66484	0.850076	Upregulated in liquid only
C3_00050C	1.10766	1.98294	1.46734	1.36329	0.681181	0.5463	0.590134	-0.0428515	Upregulated in liquid only
CR_01720W	1.41842	1.70928	1.19973	1.32505	0.97553	0.598104	0.613724	0.485009	Upregulated in liquid only
C1_09650W	1.32173	1.78483	1.14388	1.27438	-0.0103707	0.451446	0.462925	0.396772	Upregulated in liquid only
C4_03990C	1.24227	1.75734	1.09777	1.40147	0.93333	0.700938	0.538389	0.877775	Upregulated in liquid only
CR_00220W	1.10111	1.87468	1.1149	1.2741	0.746828	0.741913	0.519879	0.997785	Upregulated in liquid only
C2_06510W	1.20637	1.69501	1.10776	1.23073	0.879075	0.916537	0.741688	0.776031	Upregulated in liquid only
C5_02310C	1.27755	1.52127	1.22824	1.18759	0.817926	0.881354	0.744956	0.87251	Upregulated in liquid only
CR_10020C	1.15344	1.56944	1.43816	1.0451	0.370443	0.194709	0.063142	0.0456131	Upregulated in liquid only
C7_01730C_A	1.17713	1.62792	1.22596	1.17511	0.384873	0.341692	0.102091	0.159383	Upregulated in liquid only
C2_09850C	1.20669	1.55469	1.10055	1.33137	0.466984	0.0541259	0.278339	0.64283	Upregulated in liquid only
C2_09590C	1.08396	1.87571	1.11365	1.02509	0.83267	0.526907	0.372074	0.367075	Upregulated in liquid only
C1_11660W_A	1.34326	1.28657	1.1693	1.21165	0.392399	0.478417	0.859651	0.645695	Upregulated in liquid only
CR_09600C_A	1.42808	1.28081	1.06147	1.1769	0.202626	-0.13499	0.106861	0.0351356	Upregulated in liquid only
C2_01780W_A	1.33462	1.26623	1.12005	1.15738	0.77638	0.869426	0.97493	0.583306	Upregulated in liquid only
C3_02240C_A	1.23657	1.43109	1.19926	1.00936	0.433069	0.219017	0.304041	-0.105678	Upregulated in liquid only
C1_02680C	1.17526	1.25736	1.07461	1.30695	0.728459	0.597519	0.840114	0.995371	Upregulated in liquid only
C7_01050W	1.22758	1.52679	1.01578	1.02605	0.381483	0.696039	0.506921	0.113121	Upregulated in liquid only
C4_03530W	-1.36871	-1.2304	-1.02914	-1.10967	0.233829	-0.144294	-0.397339	-0.691927	Downregulated in liquid only
C2_02740C_A	-1.13506	-1.80168	-1.02133	-1.0642	-0.886736	-0.652882	-0.533944	-0.650878	Downregulated in liquid only
C4_04410C_A	-1.41433	-1.45937	-1.12207	-1.03978	-0.117031	-0.689356	-0.426352	-0.797536	Downregulated in liquid only
CR_00080W_A	-1.24997	-1.76592	-1.00215	-1.13265	-0.0923486	-0.402884	-0.365323	-0.852844	Downregulated in liquid only
CR_02520W_A	-1.11982	-1.91905	-1.06551	-1.10387	-0.773583	-0.836957	-0.750766	-0.938467	Downregulated in liquid only
CR_08090W_A	-1.27314	-2.02283	-1.00046	-1.06543	-0.814713	-0.710673	-0.616972	-0.750508	Downregulated in liquid only
CR_02940C	-1.24736	-1.53112	-1.50387	-1.08694	-0.373297	-0.633733	-0.708685	-0.594418	Downregulated in liquid only
C4_00750C	-1.12534	-1.8431	-1.1918	-1.24702	-0.458737	-0.237153	-0.340814	-0.708753	Downregulated in liquid only
CR_07050C_A	-1.19135	-2.10596	-1.11928	-1.09412	0.548337	0.224883	0.383085	0.306805	Downregulated in liquid only
C2_09060C_A	-1.47644	-1.48505	-1.49659	-1.18214	-0.62622	-0.367407	-0.742478	-0.734293	Downregulated in liquid only
C3_06760W	-1.12272	-2.246	-1.22761	-1.05324	-0.1338	-0.438631	-0.357165	-0.475283	Downregulated in liquid only
C1_03370W	-1.27949	-2.09403	-1.3092	-1.15685	-0.458615	-0.431254	-0.393594	-0.593981	Downregulated in liquid only
C6_02770W_A	-1.3136	-2.25458	-1.25693	-1.22733	-0.697837	-0.660085	-0.668623	-0.7978	Downregulated in liquid only
C1_08810C_A	-1.29717	-2.41723	-1.57363	-1.0559	-0.276477	-0.321751	-0.394996	-0.302159	Downregulated in liquid only
CR_06300C_A	-1.62744	-2.49856	-1.27067	-1.15021	-0.147332	-0.199907	-0.0778046	-0.0269609	Downregulated in liquid only
C1_00160C	-1.49577	-2.51792	-1.56913	-1.41501	-0.431486	-0.532793	-0.424035	-0.654763	Downregulated in liquid only
C2_04010C	8.52246	4.56038	1.32821	6.3932	0.0752745	0.349451	-0.356514	0.545442	Upregulated in liquid +
C3_00220W	7.87397	3.44305	1.95324	7.17015	-1.29895	-1.33116	-1.06252	7.17126	Upregulated in liquid +
C3_00230C	7.71895	3.26402	2.04205	7.23396	-1.71624	-1.86571	-1.66198	6.48597	Upregulated in liquid +
C4_00450C	7.58151	1.77374	1.22758	2.34238	0.0112919	0.619855	0.609085	0.824744	Upregulated in liquid +
C5_04930C	7.46216	8.5444	1.6174	6.6496	2.33571	1.74139	0.340917	5.7462	Upregulated in liquid +
CR_00200W	6.52288	3.64107	4.09128	6.56716	3.01111	0.800537	3.09959	6.01237	Upregulated in liquid +
C2_01020W	5.92336	4.31328	3.3363	4.67025	4.10865	2.16991	1.30879	0.363498	Upregulated in liquid +
C3_00920W	5.77599	8.34894	4.10848	5.89533	3.08256	1.13749	0.462608	5.06949	Upregulated in liquid +
CR_02490W	5.70078	5.79457	1.44245	4.96357	4.78268	0.629973	0.772872	1.88821	Upregulated in liquid +
C2_09220W	4.59821	3.93224	1.38394	3.40384	3.12696	1.92093	1.0831	0.945353	Upregulated in liquid +
CR_02750C	4.49292	5.95593	4.77146	3.99128	4.43993	2.02077	2.12253	0.288209	Upregulated in liquid +
C6_01070C	4.48588	6.71562	2.22973	3.14377	5.65713	0.793901	1.01667	1.88917	Upregulated in liquid +
C6_03240W	4.41434	6.22327	2.1009	4.41913	3.11427	2.90313	0.560626	3.02677	Upregulated in liquid +
CR_10840C	4.40871	2.33563	1.57381	3.29532	1.13797	0.563925	0.582135	2.18496	Upregulated in liquid +
C5_02460C	4.35112	3.79422	2.72814	3.83063	4.83406	1.96083	1.62186	0.599197	Upregulated in liquid +
C2_06570C	4.33072	4.13468	2.00904	3.47382	2.08654	2.46832	0.355234	1.37918	Upregulated in liquid +
C1_06280C	4.24639	4.4996	4.51873	3.89258	3.39017	3.61584	3.20388	0.54141	Upregulated in liquid +
C1_07040C	4.24278	4.24469	3.92694	3.35092	2.61139	0.233659	0.742549	-0.625237	Upregulated in liquid +
C5_04560C	3.84264	4.97199	3.47694	3.26224	3.24375	2.59475	2.41588	0.717195	Upregulated in liquid +
C1_05920W	3.53688	3.80762	3.81936	2.89752	2.82287	1.26204	2.83924	-0.405876	Upregulated in liquid +
C2_03790C	3.52945	3.34328	1.7763	3.37441	1.34487	0.889728	1.05944	2.19072	Upregulated in liquid +
CR_05170C	3.47566	5.46672	1.22341	3.84063	0.0722593	0.216199	-0.0241865	2.67526	Upregulated in liquid +
C5_03750W	3.46707	3.91516	2.95037	3.29081	2.71069	1.61165	2.3544	0.418178	Upregulated in liquid +
C2_07720C	3.4642	4.01135	2.63838	3.12573	2.28432	0.966948	0.589859	0.189507	Upregulated in liquid +
C1_10290W	3.45161	1.70589	1.39384	1.23859	0.312552	0.370638	0.642641	0.510552	Upregulated in liquid +
C1_11950W	3.44139	4.80907	1.80501	4.64956	2.06205	1.67743	-0.0328613	4.26113	Upregulated in liquid +
C1_02150W	3.39569	2.88071	1.16706	3.366	1.67496	0.793681	0.093243	3.01269	Upregulated in liquid +
CR_07220C	3.35541	2.79588	1.99028	2.79718	2.56844	1.13055	0.860681	0.661624	Upregulated in liquid +
C7_00660W	3.33234	3.04458	1.38301	3.57663	4.37165	2.62035	0.814329	4.19096	Upregulated in liquid +
C4_03500C	3.28876	4.55289	4.80058	2.97101	3.29997	0.403397	2.21134	-0.487835	Upregulated in liquid +
C5_00390C	3.27421	3.40318	2.50193	3.10644	2.15441	0.903702	0.632387	2.36425	Upregulated in liquid +
CR_07680C	3.17737	1.50169	2.40904	2.19451	0.583994	1.31307	1.41399	1.46487	Upregulated in liquid +
C1_05160C	3.12505	3.06271	1.09694	2.76853	1.24707	1.25754	0.55332	1.38833	Upregulated in liquid +
C1_08230C	3.11934	3.88923	3.11007	2.6793	3.56444	1.01872	1.51738	0.201281	Upregulated in liquid +
C4_04380C	2.99651	3.71088	2.63914	2.88912	2.64017	1.81985	1.25446	0.730044	Upregulated in liquid +
CR_02280W	2.92571	3.03613	2.00575	3.01172	2.3611	0.700784	1.60495	-0.381904	Upregulated in liquid +
C4_05560C	2.81915	2.83569	2.33478	2.17837	3.59829	1.56047	1.23586	0.895198	Upregulated in liquid +
C3_02610C	2.81892	2.91742	1.9731	2.565	1.03048	0.720481	0.361697	0.807772	Upregulated in liquid +
C3_06660C	2.77794	3.23083	1.93023	2.34505	1.109	1.58601	0.96086	1.12266	Upregulated in liquid +
C4_02030W	2.71441	3.01245	2.5335	2.30508	2.3699	1.50914	1.32709	-0.586492	Upregulated in liquid +
C2_00660C	2.6973	4.51128	5.49426	3.12646	3.71229	0.174816	3.40286	3.24703	Upregulated in liquid +
CR_04275W	2.69351	2.66108	1.7011	2.81651	2.73047	2.41943	1.18532	0.793139	Upregulated in liquid +
C7_02240W	2.64233	4.28351	1.51931	2.54066	1.36395	1.65949	0.915482	2.31936	Upregulated in liquid +
C7_00090C	2.62792	4.91796	4.52032	2.89157	5.83707	1.23068	0.509793	1.53692	Upregulated in liquid +
C6_03090W	2.57782	3.0685	1.4553	2.34634	1.67895	-0.212033	-0.0967319	-1.64943	Upregulated in liquid +
C5_04260W	2.55975	3.93191	2.32622	2.33175	2.84088	1.21615	0.984234	1.64523	Upregulated in liquid +
C2_08390W	2.5514	2.49649	1.22393	2.37895	0.779698	0.952452	1.08447	1.83323	Upregulated in liquid +
C2_08340C	2.51656	3.28226	2.05193	2.28296	1.87272	0.98868	1.15536	1.39507	Upregulated in liquid +
C2_08330W	2.44597	3.84829	1.65169	2.34276	1.63726	1.57206	0.747231	1.84905	Upregulated in liquid +
C3_05710W	2.44065	2.93004	1.46667	2.15516	1.71856	1.86731	1.30074	0.710043	Upregulated in liquid +
C5_05510C	2.42857	3.04476	1.44922	2.89804	1.89085	1.29171	0.24083	0.512597	Upregulated in liquid +
C1_12010C	2.37384	2.38698	2.05135	2.03445	1.49887	0.920004	0.700398	0.49193	Upregulated in liquid +
C3_02330C	2.3551	2.67671	1.74464	1.77798	1.91874	1.09858	1.0471	0.961936	Upregulated in liquid +
CR_09270C	2.34746	2.53	2.18893	2.19195	1.38191	0.831622	1.18711	0.747302	Upregulated in liquid +
C1_07080W	2.34209	3.09137	1.89737	2.49644	0.998946	0.606708	0.974701	1.71999	Upregulated in liquid +
C1_05890W	2.32084	7.25053	1.17502	2.84271	0.696803	0.953514	0.977773	3.47387	Upregulated in liquid +
C4_05250W	2.30355	2.02167	2.70293	1.66508	0.796356	-1.04097	2.96871	-1.7157	Upregulated in liquid +
C4_02360W	2.25315	2.91885	1.21533	1.90095	1.43767	0.922706	1.08792	1.15996	Upregulated in liquid +
C5_03430W	2.24901	2.87951	2.76116	2.15485	1.95388	1.56744	1.9915	-0.75695	Upregulated in liquid +
C2_00510W	2.24322	2.69892	1.51888	2.0795	1.03768	1.14128	0.992316	1.47979	Upregulated in liquid +
C1_05440C	2.23793	3.3096	1.60606	1.41415	2.25664	0.897185	0.765646	0.23516	Upregulated in liquid +
CR_04480C	2.19567	3.28899	4.02469	2.16417	1.95774	1.0164	0.819196	1.76017	Upregulated in liquid +
C4_03340C	2.19156	6.56677	1.04991	2.06417	2.64341	4.56245	0.980686	2.02287	Upregulated in liquid +
C1_10740C	2.19075	2.31287	1.31375	2.008	0.512223	0.137459	1.20605	0.992114	Upregulated in liquid +
C3_01360C	2.11521	2.45384	1.91103	1.75344	1.84495	1.23724	1.38613	0.591276	Upregulated in liquid +
CR_02800C	2.09571	2.46184	1.6528	2.19546	1.20114	0.81135	1.04387	1.64214	Upregulated in liquid +
CR_06860C	2.06693	2.89315	1.23781	2.95136	-0.531501	0.959012	0.698123	2.4256	Upregulated in liquid +
C1_08900W	2.03274	2.57035	2.81768	1.82846	1.88421	0.862913	1.46735	0.285844	Upregulated in liquid +
C5_03610W	2.01578	2.33849	2.1583	1.75456	1.58792	0.825904	1.19856	0.883608	Upregulated in liquid +
C4_01320C	2.00206	2.40534	1.60296	1.88811	1.78315	1.22291	0.790016	1.12551	Upregulated in liquid +
C7_03480W	1.99578	2.54077	1.55227	1.57267	1.78722	1.3642	0.775498	0.546281	Upregulated in liquid +
C6_04420W	1.95618	2.6205	1.71406	2.03844	2.43846	1.84303	1.20551	0.883462	Upregulated in liquid +
C4_05350W	1.9537	1.95977	1.86374	1.58402	1.60679	0.68738	0.681753	0.443272	Upregulated in liquid +
C1_01840C	1.94741	2.61573	1.70939	2.35555	1.01493	1.03718	0.752606	2.20032	Upregulated in liquid +
C2_04970W	1.9268	2.38387	1.77524	1.88878	0.956893	0.843514	1.13225	1.40942	Upregulated in liquid +
C4_01850C	1.92434	1.8383	1.585	1.87042	1.91077	0.587546	0.910777	0.403283	Upregulated in liquid +
C3_00400C	1.92299	2.83127	1.15477	1.87594	1.56464	1.40256	0.74576	1.60503	Upregulated in liquid +
C3_05990C	1.88709	1.95591	2.00399	1.51807	1.6934	1.44815	1.25333	0.973024	Upregulated in liquid +
C2_07770C	1.85359	1.93048	1.36043	1.93469	1.29504	0.825187	1.17723	1.09481	Upregulated in liquid +
C2_10560C	1.82127	1.45102	1.24599	1.40586	0.964402	0.745998	0.491828	1.50079	Upregulated in liquid +
C7_03440W	1.81106	1.62731	1.58664	1.7552	1.61952	0.902885	1.51574	1.33831	Upregulated in liquid +
C4_05140C	1.80519	2.16647	1.19642	1.75802	1.29815	1.09197	0.950355	1.32455	Upregulated in liquid +
CR_09880W	1.79795	1.35375	1.33587	1.24273	1.35979	1.18911	0.915892	0.414365	Upregulated in liquid +
C3_01060W	1.79742	3.37429	1.41578	2.15912	0.56983	-0.789027	-0.442287	1.28955	Upregulated in liquid +
C6_03270C	1.78174	2.34782	1.32169	1.75666	1.4944	1.75161	0.917955	1.35421	Upregulated in liquid +
CR_06510W	1.77966	3.61154	1.54485	1.731	2.75075	2.09797	1.59485	0.90101	Upregulated in liquid +
CR_04630C	1.76211	2.06286	1.50689	1.70733	1.02283	0.849611	0.789921	0.681824	Upregulated in liquid +
C1_14060W	1.74071	2.50791	1.80805	1.54846	2.26801	1.22014	1.56312	0.389298	Upregulated in liquid +
C6_04400W	1.73746	2.47554	1.64924	1.63798	1.44802	1.36035	0.806	0.625781	Upregulated in liquid +
C1_02700C	1.7359	2.03112	1.68582	1.58263	1.19237	1.13427	2.13118	-0.0740774	Upregulated in liquid +
C6_02330W	1.72894	2.00836	1.61439	1.75083	1.89894	1.49377	1.29702	0.62826	Upregulated in liquid +
CR_07480W	1.7238	1.33692	1.03606	1.69102	3.40748	1.42328	2.47237	0.942949	Upregulated in liquid +
C6_04600W	1.70674	2.207	1.36401	1.75169	1.21058	1.11336	0.802098	1.0237	Upregulated in liquid +
C3_07470W	1.67946	1.90544	1.50384	1.33661	2.15018	0.580744	0.763853	1.03797	Upregulated in liquid +
CR_00910W	1.67904	1.84645	1.68189	1.15129	1.99537	1.22665	1.54775	-0.200392	Upregulated in liquid +
CR_01900C	1.67048	1.84673	1.02559	1.84824	0.953853	1.18965	0.88333	1.79512	Upregulated in liquid +
CR_05490W	1.67028	2.38135	1.59406	1.8081	1.12292	1.2793	0.947776	1.06434	Upregulated in liquid +
C3_02300W	1.65306	1.15763	1.16074	1.0523	1.38267	1.35865	1.21145	0.628766	Upregulated in liquid +
C4_02620C	1.60255	1.56552	1.44879	1.56371	0.58567	0.479832	1.67814	1.29044	Upregulated in liquid +
C1_02630C	1.59562	1.59126	2.06203	1.27423	0.78884	0.375796	1.559	-0.894738	Upregulated in liquid +
C3_01020W	1.59049	2.17701	1.7883	1.20155	1.86261	0.655776	0.672504	0.377997	Upregulated in liquid +
C1_08530W	1.58558	1.94994	1.67764	1.64548	2.01988	0.825043	0.858042	0.558777	Upregulated in liquid +
C1_08940C	1.55565	1.97474	2.06001	1.57212	1.86558	1.04429	1.19183	0.954016	Upregulated in liquid +
C4_02340W	1.55066	2.27778	1.52001	1.42322	1.6789	1.15529	1.12411	0.854178	Upregulated in liquid +
C6_00140C	1.54287	1.27429	1.17455	1.50081	1.24173	1.00942	0.704127	0.957724	Upregulated in liquid +
CR_10860C	1.53434	2.24911	2.22703	1.38451	1.08416	0.659177	0.718604	-0.684184	Upregulated in liquid +
C4_05530W	1.53229	1.78648	1.04617	1.5396	1.37498	1.08784	0.849062	1.29643	Upregulated in liquid +
CR_06730W	1.51695	2.33589	1.67087	1.72123	0.912656	0.592	0.421432	1.08535	Upregulated in liquid +
CR_00020W	1.51664	2.44143	2.56162	1.51843	1.63164	1.282	1.34798	-0.291416	Upregulated in liquid +
C5_01260W	1.48229	2.35136	1.90883	1.52016	1.85938	0.643851	0.139421	1.23423	Upregulated in liquid +
C5_01450W	1.47924	2.98544	1.76511	1.27666	2.47811	1.0565	0.945701	0.436726	Upregulated in liquid +
C6_03860C	1.47426	1.51731	1.47651	1.46217	0.778225	0.80059	0.66484	0.850076	Upregulated in liquid +
CR_09290W	1.44793	1.86013	1.13425	1.40934	0.417555	4.79726	0.0592052	0.558373	Upregulated in liquid +
C4_01230C	1.42973	1.67792	1.13205	1.22691	1.0512	0.801479	0.93016	0.192511	Upregulated in liquid +
CR_09600C	1.42808	1.28081	1.06147	1.1769	0.202626	-0.13499	0.106861	0.0351356	Upregulated in liquid +
C1_00040W	1.42523	2.45494	2.22964	1.47951	1.22981	1.09076	1.09706	0.0418537	Upregulated in liquid +
C6_02660C	1.41573	2.28432	1.08967	1.31417	1.64936	1.3247	0.980161	1.22905	Upregulated in liquid +
C2_02570W	1.40626	1.97241	1.16453	1.26153	1.29087	1.14901	0.818209	0.440945	Upregulated in liquid +
C4_06480C	1.39557	1.86191	1.43395	1.41317	0.568273	1.05518	0.760283	0.0908158	Upregulated in liquid +
C3_01940C	1.39255	1.25468	1.13643	1.25307	1.34228	0.64652	0.643409	0.510252	Upregulated in liquid +
C6_03990C	1.38887	1.82768	1.10801	1.35422	1.32451	0.924907	0.857908	1.19005	Upregulated in liquid +
C3_04840C	1.37844	3.61747	2.95173	1.56355	2.62663	0.683177	0.257066	0.851533	Upregulated in liquid +
C6_02790C	1.36625	1.66889	1.01483	1.09509	1.09111	0.490115	0.467684	0.897508	Upregulated in liquid +
C1_11660W	1.34326	1.28657	1.1693	1.21165	0.392399	0.478417	0.859651	0.645695	Upregulated in liquid +
C6_03310W	1.34237	1.17045	1.06154	1.0936	1.45536	0.995417	0.749369	0.624389	Upregulated in liquid +
C2_01780W	1.33462	1.26623	1.12005	1.15738	0.77638	0.869426	0.97493	0.583306	Upregulated in liquid +
C7_02750W	1.32668	1.605	1.0574	1.27241	1.16017	0.853195	0.749274	1.12081	Upregulated in liquid +
C1_13950C	1.32604	2.08996	1.76851	1.32229	0.960195	0.697137	0.714312	1.14582	Upregulated in liquid +
C1_06940C	1.31555	1.76861	1.06776	1.2234	0.968145	0.823708	0.935161	1.01282	Upregulated in liquid +
C3_07830W	1.3142	1.50479	1.24919	1.31474	0.337089	0.418223	0.620939	1.13575	Upregulated in liquid +
C2_08640C	1.30328	2.16516	1.03687	1.35467	-0.059607	0.540196	0.64334	1.61756	Upregulated in liquid +
C2_04480W	1.30185	2.79047	1.42901	1.54816	0.825669	1.23187	0.501366	0.930525	Upregulated in liquid +
CR_04760C	1.29278	1.39434	1.07195	1.43158	2.82254	0.64737	0.820962	1.04463	Upregulated in liquid +
C4_04250W	1.28925	2.06898	1.64598	1.09158	1.13289	0.310556	0.459061	0.0448852	Upregulated in liquid +
C3_03450C	1.28612	1.92397	1.6715	1.20089	1.36727	0.703088	0.992346	-0.208924	Upregulated in liquid +
C6_04430W	1.25527	1.96025	1.44153	1.21015	1.15324	0.827614	0.751377	0.555544	Upregulated in liquid +
C2_02550C	1.25515	1.92049	1.68763	1.36052	1.57546	1.44546	1.17998	0.717853	Upregulated in liquid +
C3_07840C	1.24078	1.47994	1.0938	1.43955	0.235824	0.329177	0.679233	1.1041	Upregulated in liquid +
C3_02240C	1.23657	1.43109	1.19926	1.00936	0.433069	0.219017	0.304041	-0.105678	Upregulated in liquid +
CR_09360W	1.21485	2.65857	1.56258	2.35488	2.5705	5.55967	0.688403	3.11457	Upregulated in liquid +
C4_06550C	1.20815	1.24632	1.07755	1.21272	1.21158	0.664076	0.84032	1.03612	Upregulated in liquid +
C4_06980W	1.20293	1.51868	7.18541	1.2215	0.448359	1.25265	1.05022	-0.632794	Upregulated in liquid +
C7_01730C	1.17713	1.62792	1.22596	1.17511	0.384873	0.341692	0.102091	0.159383	Upregulated in liquid +
C3_04630W	1.15082	1.77985	1.23592	1.47899	0.0903549	0.466308	0.645908	1.11597	Upregulated in liquid +
C1_09250W	1.13772	2.23867	2.10862	1.67325	0.764502	1.28488	1.71606	0.0857013	Upregulated in liquid +
CR_09180W	1.13429	1.7429	1.25687	1.02958	1.32844	0.681625	0.606819	0.209934	Upregulated in liquid +
C3_07070C	1.00073	3.03422	1.31362	1.04422	2.46127	0.730145	0.550918	0.916378	Upregulated in liquid +
CR_02520W	-1.11982	-1.91905	-1.06551	-1.10387	-0.773583	-0.836957	-0.750766	-0.938467	Downregulated in liquid +
C5_00850C	-1.12168	-1.32368	-1.05046	-1.07208	-1.21624	-0.804476	-0.874417	-0.654648	Downregulated in liquid +
C2_02740C	-1.13506	-1.80168	-1.02133	-1.0642	-0.886736	-0.652882	-0.533944	-0.650878	Downregulated in liquid +
C4_01000C	-1.18349	-1.63825	-1.9032	-1.53764	-0.822945	-0.281461	-0.787027	-1.60011	Downregulated in liquid +
C1_01600W	-1.18372	-1.91899	-1.14045	-1.00851	-1.13623	-0.673138	-0.63411	-0.651032	Downregulated in liquid +
CR_07050C	-1.19135	-2.10596	-1.11928	-1.09412	0.548337	0.224883	0.383085	0.306805	Downregulated in liquid +
C6_04610C	-1.20677	-2.26216	-2.03788	-1.2099	-2.73966	-2.31747	-2.53458	0.163426	Downregulated in liquid +
C2_05000C	-1.24917	-1.91467	-1.01382	-1.03007	-1.34035	-0.829417	-0.848176	-0.876128	Downregulated in liquid +
CR_00080W	-1.24997	-1.76592	-1.00215	-1.13265	-0.0923486	-0.402884	-0.365323	-0.852844	Downregulated in liquid +
C4_03410W	-1.26483	-1.93326	-1.0251	-1.08936	-1.50865	-0.871123	-0.761371	-0.957723	Downregulated in liquid +
C5_03850W	-1.26768	-1.30811	-1.00142	-1.09955	-1.34364	-0.706582	-0.813677	-0.759207	Downregulated in liquid +
CR_08090W	-1.27314	-2.02283	-1.00046	-1.06543	-0.814713	-0.710673	-0.616972	-0.750508	Downregulated in liquid +
C1_08810C	-1.29717	-2.41723	-1.57363	-1.0559	-0.276477	-0.321751	-0.394996	-0.302159	Downregulated in liquid +
C6_02770W	-1.3136	-2.25458	-1.25693	-1.22733	-0.697837	-0.660085	-0.668623	-0.7978	Downregulated in liquid +
C2_05370C	-1.3525	-1.33976	-1.18883	-1.09412	-0.993866	-0.954075	-1.03693	-0.642266	Downregulated in liquid +
C4_04410C	-1.41433	-1.45937	-1.12207	-1.03978	-0.117031	-0.689356	-0.426352	-0.797536	Downregulated in liquid +
C3_03470W	-1.41755	-1.90916	-1.74987	-1.12612	-1.99809	-1.44426	-1.5835	-0.938337	Downregulated in liquid +
C5_05410C	-1.4516	-2.16391	-1.24875	-1.24481	-1.05501	-1.13775	-0.936055	-1.11881	Downregulated in liquid +
C2_09350W	-1.47055	-1.9307	-1.3376	-1.21731	-1.20674	-0.811158	-0.775709	-0.877017	Downregulated in liquid +
C1_12910W	-1.47063	-1.84055	-1.1173	-2.34467	-0.880309	-1.17834	-1.44672	-5.02571	Downregulated in liquid +
C2_09060C	-1.47644	-1.48505	-1.49659	-1.18214	-0.62622	-0.367407	-0.742478	-0.734293	Downregulated in liquid +
C6_01930W	-1.48112	-1.66174	-1.11029	-1.29692	-0.449586	-0.601099	-0.733127	-1.05175	Downregulated in liquid +
C4_03230C	-1.49159	-1.7153	-1.77494	-1.31886	-0.0290611	-0.650788	-0.690397	-1.20064	Downregulated in liquid +
C3_03800W	-1.50405	-2.41598	-2.37441	-1.36274	-1.59578	-2.38622	-1.89642	-0.948745	Downregulated in liquid +
C6_00620W	-1.51804	-1.94274	-1.47296	-1.15909	-0.881155	-1.50003	-1.50043	-0.884221	Downregulated in liquid +
CR_06300C	-1.62744	-2.49856	-1.27067	-1.15021	-0.147332	-0.199907	-0.0778046	-0.0269609	Downregulated in liquid +
C7_00430W	-1.78293	-6.23088	-5.54783	-1.9581	-0.503748	-4.50689	-5.05998	-2.54733	Downregulated in liquid +
C4_04080C	-1.89449	-1.73624	-1.16772	-1.84917	-1.15616	-1.63937	2.39337	-2.40864	Downregulated in liquid +
C4_07170C	-1.92853	-1.50751	-1.48114	-1.90611	-1.32554	-0.435695	-1.18138	-1.82393	Downregulated in liquid +
C1_05940W	-1.99569	-3.45199	-1.94737	-2.06807	-1.91044	-0.692733	-0.61365	-1.72934	Downregulated in liquid +
C4_04320W	-2.08941	-1.28718	-1.02475	-1.75192	1.31979	1.46615	-0.0729423	-1.40835	Downregulated in liquid +
C2_01010W	-2.21633	-3.35558	-2.09617	-2.47949	-1.61557	-1.73874	0.434904	-2.97897	Downregulated in liquid +
C4_03250C	-2.27211	-3.2064	-2.59396	-1.84852	-0.311718	-0.778888	-0.707415	-1.11578	Downregulated in liquid +
C6_03790C	-3.62125	-4.44295	-2.05582	-3.85607	-6.8583	-5.98861	-0.257498	-3.17031	Downregulated in liquid +
C1_05000W	-3.66643	-5.40905	-2.22675	-3.5272	-1.37223	-0.657589	-0.694816	-3.01339	Downregulated in liquid +
C3_02060W	3.60283	1.76164	1.4046	1.13262	0.311925	0.635096	0.331114	0.0649109	Upregulated in solid only
C4_00960W	1.89163	1.50076	1.61436	1.78766	0.488481	-0.235295	0.755358	0.764181	Upregulated in solid only
C7_02040C	1.72182	2.02437	1.51027	1.2518	0.27817	0.349468	-1.10695	0.845521	Upregulated in solid only
CR_01620C	2.07544	1.26586	1.28902	1.03298	-0.339363	0.0633548	0.160551	0.175405	Upregulated in solid only
C6_01090C	1.24641	1.08559	1.42663	1.0827	0.698168	0.214096	0.298631	0.568321	Upregulated in solid only
C4_05820W	-1.13658	-1.06563	-1.02022	-1.17081	-0.76708	-0.99652	-0.471837	-0.736851	Downregulated in solid only
C1_07600W	-1.22972	-1.19978	-1.00574	-1.08266	-0.921741	-0.987874	-0.542631	-0.724636	Downregulated in solid only
C2_06240W	-1.21206	-1.0738	-1.111	-1.1817	-0.837869	-0.921142	-0.591979	-0.706139	Downregulated in solid only
C2_08200W	-1.28791	-1.08517	-1.02926	-1.22637	1.00692	-0.57849	-0.543524	0.08044	Downregulated in solid only
CR_05370W	-1.09937	-1.08614	-1.21086	-1.2338	0.430772	0.62927	0.314717	0.233583	Downregulated in solid only
C1_08970W	-1.22128	-1.07634	-1.22689	-1.29003	-0.325774	-0.748254	-0.434802	-0.303251	Downregulated in solid only
C3_01440C	-1.61224	-1.08534	-1.13375	-1.04711	-0.83947	-0.670357	-0.605043	-0.525855	Downregulated in solid only
C1_04010C	-1.1689	-1.28031	-1.10281	-1.62802	0.743573	0.865719	-0.0284924	0.282078	Downregulated in solid only
CR_10380C	-1.22693	-1.28463	-1.10547	-1.67372	-0.708029	-0.609599	-0.375247	-0.658443	Downregulated in solid only
C6_01360W	-1.4659	-1.63616	-1.23153	-1.04939	0.951049	1.36116	-0.0626302	0.576737	Downregulated in solid only
C1_07010W	-1.22857	-1.612	-1.28282	-1.27128	-0.417792	-0.58585	-0.253288	-0.724143	Downregulated in solid only
C6_02520W	-2.06041	-1.14653	-1.21096	-1.08936	-0.604389	-0.822742	-0.825073	-0.716323	Downregulated in solid only
C1_06120C	-1.70196	-1.54975	-1.18685	-1.10821	-0.303823	-0.401374	-0.20005	-0.467032	Downregulated in solid only
CR_08420W	-1.08673	-1.45786	-1.41965	-1.85045	0.83143	1.19944	0.624717	1.09638	Downregulated in solid only
C1_03820W	-1.60893	-1.54795	-1.7464	-1.14977	0.66335	0.0842385	-0.577078	-0.0513189	Downregulated in solid only
C2_09550C	-1.37965	-1.33899	-1.97056	-1.66252	-0.417979	-0.00779622	-0.140776	-0.673307	Downregulated in solid only
C2_05060C	-1.35856	-2.03152	-1.88268	-1.97748	2.44004	1.2657	1.43209	0.888982	Downregulated in solid only
C7_00770W	-1.80299	-1.82042	-1.94652	-3.44884	1.10509	0.290513	-0.284453	-0.713612	Downregulated in solid only
C4_03470C	10.2469	8.1627	6.47856	5.15403	10.6971	0	9.28381	10.2088	Upregulated in solid +
C4_01340W	7.37594	6.23808	5.01562	3.86851	-1.41785	2.6125	-2.47086	-2.55522	Upregulated in solid +
C6_01060C	5.48183	2.33074	3.00665	4.35274	2.43219	5.75648	0.525783	3.27857	Upregulated in solid +
C1_10060C	4.97556	4.16579	3.25923	2.19302	0.815593	5.12825	1.12327	0.943486	Upregulated in solid +
CR_05610C	3.57582	3.51124	3.26144	2.99166	1.5517	1.44328	0.459635	1.9163	Upregulated in solid +
C6_00960W	5.57795	2.31948	2.05944	3.22463	1.71844	2.44628	0.21428	2.99257	Upregulated in solid +
C4_05770C	4.42903	3.5199	1.8989	3.29747	0.656434	0.916256	1.69975	2.2275	Upregulated in solid +
C3_05620W	3.97126	3.12553	2.17884	3.11011	2.71567	3.73533	0.785685	2.85808	Upregulated in solid +
C1_07220W	1.18788	4.14796	1.57137	4.67154	3.48087	5.291	-0.383525	3.87638	Upregulated in solid +
C1_10430W	2.60293	1.55822	3.94033	3.37519	1.04864	0.8188	1.14141	1.86569	Upregulated in solid +
C1_13870W	4.36396	1.65494	1.23519	4.12105	2.31567	-0.407369	-1.54103	3.26379	Upregulated in solid +
C1_02120C	3.41173	2.01448	2.60354	3.14666	2.06602	0.474952	0.975591	2.30864	Upregulated in solid +
C2_09880C	3.59025	2.509	2.23204	2.13049	2.80193	2.29655	-0.213807	3.25501	Upregulated in solid +
C1_14130W	3.54385	2.03205	2.52603	1.53503	0.668247	2.43995	3.1552	1.07321	Upregulated in solid +
C6_03370W	2.23329	2.06808	2.15426	2.86993	2.20173	2.09548	0.804244	2.33941	Upregulated in solid +
C1_10580C	2.69908	2.2806	2.36	1.67969	1.0109	1.885	0.418455	1.15877	Upregulated in solid +
CR_00290W	1.98295	2.56992	1.95069	2.34665	1.66892	1.0492	0.29817	1.70454	Upregulated in solid +
C1_14020W	2.27269	2.16248	1.46027	2.40902	2.62332	2.83821	1.13367	2.37307	Upregulated in solid +
CR_01630C	3.00855	1.47577	1.25939	2.24448	0.654991	-0.452755	-0.767241	1.179	Upregulated in solid +
C2_02610C	2.19283	2.12041	2.42302	1.06637	-0.886355	0.160157	1.04393	-0.337128	Upregulated in solid +
C2_10150W	2.09365	1.54016	2.28689	1.67451	1.8496	3.60815	1.05958	2.10473	Upregulated in solid +
C2_00860C	3.12091	1.68936	1.4354	1.25983	1.07011	0.362437	3.47166	0.601382	Upregulated in solid +
CR_09460C	1.73418	1.88466	1.56555	2.27563	1.6294	2.14739	0.262264	1.68689	Upregulated in solid +
CR_01640C	2.96044	1.38836	1.20576	1.78294	0.833814	0.160559	-0.249575	1.29881	Upregulated in solid +
C1_02580W	3.30082	1.5448	1.09247	1.29317	1.28631	1.99831	0.758869	1.35053	Upregulated in solid +
C5_00710W	1.59757	2.02186	1.70537	1.65263	1.11543	0.502385	0.312631	0.946772	Upregulated in solid +
C1_13620W	1.77509	1.74167	1.07029	2.34979	1.65111	1.57035	0.756517	2.00977	Upregulated in solid +
C2_09130C	1.8528	1.80341	1.6617	1.60708	1.19281	1.66307	0.799783	1.29452	Upregulated in solid +
CR_06610W	1.51294	2.05622	1.66774	1.6424	0.813145	1.42321	0.947074	1.01474	Upregulated in solid +
C3_02360C	2.36434	1.53937	1.08651	1.719	1.52017	1.88438	0.711203	1.87506	Upregulated in solid +
C6_00150W	1.73994	1.1709	1.03886	2.67468	2.06895	1.31366	0.716204	2.16886	Upregulated in solid +
C2_00690W	2.69615	1.00724	1.77906	1.06159	1.13289	0.778015	0.828821	1.17498	Upregulated in solid +
C5_03020W	2.44655	1.57108	1.41165	1.10216	0.464522	1.33227	1.69508	0.809337	Upregulated in solid +
C1_01710W	2.03169	1.92589	1.38517	1.13881	1.10651	0.908269	0.216049	1.11703	Upregulated in solid +
CR_07160C	2.27494	1.31627	1.29168	1.43925	2.441	1.58992	0.962195	2.36495	Upregulated in solid +
C6_02950C	2.41645	1.6422	1.25196	1.00359	1.27867	1.74461	0.888737	1.30716	Upregulated in solid +
C4_00100C	1.95265	1.49022	1.15799	1.68709	0.857576	0.528143	0.239398	0.902842	Upregulated in solid +
C1_12720C	1.51462	1.83405	1.34671	1.34812	1.89562	1.21507	0.463484	1.06816	Upregulated in solid +
CR_01470W	1.1364	1.08853	1.13405	2.64881	2.09029	2.84952	0.731892	3.11815	Upregulated in solid +
C1_02670C	1.50282	1.45204	1.27866	1.68117	1.20125	0.458501	0.303305	1.42901	Upregulated in solid +
C1_09580C	1.99599	1.40072	1.40323	1.10531	2.08485	3.27702	0.861846	1.79078	Upregulated in solid +
CR_07840C	1.27453	1.37018	1.62018	1.44973	1.44373	1.24389	0.281307	1.43751	Upregulated in solid +
C4_01170C	1.8341	1.25692	1.19631	1.35392	0.602859	1.92137	0.232975	1.06741	Upregulated in solid +
C3_04890W	1.64139	1.43335	1.10716	1.29889	1.06479	0.640366	0.447731	1.22242	Upregulated in solid +
C1_13140C	1.37644	1.72134	1.17791	1.13868	2.26605	-0.0110094	0.0619773	1.95352	Upregulated in solid +
C7_02420C	1.79343	1.04422	1.28903	1.06609	0.884522	0.56873	0.416757	0.881932	Upregulated in solid +
C4_02740W	1.02793	1.78094	1.1401	1.19544	1.27285	1.97344	0.405105	1.36825	Upregulated in solid +
C1_13590W	1.28284	1.15354	1.38271	1.26755	1.21104	0.595966	0.5155	0.881808	Upregulated in solid +
C2_02600C	1.1298	1.44161	1.0403	1.35979	0.954993	1.53072	0.701305	1.1844	Upregulated in solid +
C3_05840W	1.29509	1.32959	1.03352	1.2532	0.733085	0.514558	0.135566	1.36209	Upregulated in solid +
C4_02200C	1.31126	1.16899	1.06469	1.32274	0.853985	1.39038	0.354877	0.910842	Upregulated in solid +
CR_07830C	1.21463	1.21681	1.21337	1.19471	1.55426	1.56271	0.986333	1.52242	Upregulated in solid +
C6_03490C	1.30179	1.11423	1.07063	1.15356	0.871968	1.15597	0.733874	1.20796	Upregulated in solid +
C6_00980C	1.28753	1.01784	1.12559	1.121	1.04858	1.09917	0.620856	1.09584	Upregulated in solid +
C5_04940W	1.10119	1.13691	1.00901	1.06672	1.78398	4.37169	0.572308	1.65472	Upregulated in solid +
CR_10830C	-1.36022	-1.1148	-1.1756	-1.22435	-1.08426	-1.466	-0.712666	-1.11131	Downregulated in solid +
C5_04530W	-1.58191	-1.03585	-1.10666	-1.15731	-1.29323	-1.86318	-0.873593	-1.19766	Downregulated in solid +
C1_10390C	-1.36365	-1.24608	-1.04062	-1.31888	-1.05054	-1.7631	-0.856811	-1.19716	Downregulated in solid +
CR_05910W	-1.35486	-1.41733	-1.12901	-1.17671	-1.27456	-1.90285	-0.887324	-1.19885	Downregulated in solid +
C1_12820C	-1.313	-1.26775	-1.20187	-1.42592	-0.88701	-1.55114	-0.712208	-1.02808	Downregulated in solid +
C1_05790W	-1.49701	-1.22977	-1.23306	-1.34611	-0.871102	-1.29495	-0.852617	-0.886865	Downregulated in solid +
C5_00030W	-1.42979	-1.31155	-1.16528	-1.46735	-1.13188	-1.58535	-0.973775	-1.22932	Downregulated in solid +
C1_00590W	-1.74051	-1.26669	-1.24319	-1.16768	-1.27263	-1.93099	-1.0668	-0.995506	Downregulated in solid +
C1_06070W	-1.69918	-1.31222	-1.23122	-1.23333	-0.927606	-1.54677	-0.741039	-1.01676	Downregulated in solid +
C1_03620C	-2.13699	-1.19123	-1.06719	-1.10807	-1.31256	-2.46152	-0.98673	-1.27564	Downregulated in solid +
CR_02330C	-1.48815	-1.27851	-1.3227	-1.5136	-1.06296	-1.34564	-0.797425	-0.975411	Downregulated in solid +
C4_01740W	-1.36623	-1.39535	-1.59507	-1.26753	-0.956565	-1.81426	-1.06473	-0.974406	Downregulated in solid +
C1_04300C	-1.97374	-1.13155	-1.01041	-1.54228	-1.10167	-1.1315	-0.709347	-0.746952	Downregulated in solid +
C3_04150W	-1.14325	-1.65952	-1.59906	-1.35082	-0.932502	-1.77943	-0.905633	-0.931548	Downregulated in solid +
C7_01440W	-2.10373	-1.37492	-1.39868	-1.27916	-0.677388	-1.67301	-0.890845	-0.84214	Downregulated in solid +
CR_03500W	-2.21393	-1.58577	-1.3372	-1.17223	-1.31914	0.281102	-1.45735	-0.871604	Downregulated in solid +
C1_12280C	-1.82783	-1.68045	-1.30024	-1.51589	-1.11561	-2.35907	-0.957175	-1.26152	Downregulated in solid +
C2_04190C	-1.24014	-1.01186	-2.24703	-1.89177	-0.791526	0.0402571	-1.90999	-1.05287	Downregulated in solid +
CR_07060C	-1.24619	-1.57887	-2.09666	-1.49939	-1.15546	-3.40589	-3.24658	-0.965618	Downregulated in solid +
C1_10020W	-1.48217	-1.65934	-1.50764	-1.7729	-0.628105	-1.42502	-1.25879	-0.884421	Downregulated in solid +
C2_09830C	-1.983	-1.46045	-1.57011	-1.4218	-0.798423	-1.51344	-1.34414	-0.974009	Downregulated in solid +
CR_06630W	-1.42801	-1.59805	-1.74159	-1.88224	-0.315821	-1.32513	-0.556293	-0.972312	Downregulated in solid +
C6_00480C	-1.08206	-2.20027	-1.03882	-3.34156	-4.68913	-3.01927	-0.813277	-4.36117	Downregulated in solid +
C7_01430C	-2.29228	-1.94594	-1.79463	-1.67865	1.02046	0.0211226	-1.20421	-0.114551	Downregulated in solid +
C4_06910W	-1.57202	-2.74084	-1.83203	-2.09749	-0.213402	-3.11665	-1.71979	-0.830955	Downregulated in solid +
C1_12990W	-2.27291	-1.7956	-1.9247	-2.81688	-0.911587	-1.02551	-1.14452	-0.583357	Downregulated in solid +
C1_04140W	-2.78344	-2.10756	-2.10524	-2.48813	0.989265	-1.99173	-1.43398	0.786016	Downregulated in solid +
C6_03170C	-1.15487	-2.53565	-2.87339	-3.25796	1.59824	-1.69018	-1.90374	0.492197	Downregulated in solid +
C1_08790W	-1.99915	-3.10836	-2.813	-2.95432	-0.138993	-2.08203	-0.992195	-1.52035	Downregulated in solid +
C4_01160W	-4.12825	-1.80588	-2.70639	-3.45499	-0.913953	-3.40861	-3.04854	-1.41608	Downregulated in solid +
C7_00280W	-4.0617	-3.08479	-5.01974	-1.93207	-1.00092	1.60743	-2.48755	-0.758902	Downregulated in solid +
