# Supplementary material for: Filamentation Involves Two Overlapping, but Distinct, Programs of Filamentation in the Pathogenic Fungus Candida albicans
Source: G3 (Bethesda). 2017 Sep 25;7(11):3797–808. doi: 10.1534/g3.117.300224 (PMC5677161; doi:10.1534/g3.117.300224)
Supplement: Supplementary file 16 [file 3797TableS6.xlsx]

## Sheet: Sheet1
SN numbers	ORF	ORF19	Gene
1	C6_01070C	ORF19.113	CIP1	SN numbers apply to strain numbers from the Noble, et al set of mutant strains available from the Fungal Genetics Stock Center.
2	C6_01110W	ORF19.118	FAD2	ORF, ORF19, and Gene refer to the gene mutated in the particular strain.
7	C4_00080C	ORF19.376		The ORF column is the current systematic gene name assigned by the Candida genome database.
12	C1_04800C	ORF19.762		The ORF19 column is the old systematicgene name assigned by the Candida genome database.
17	C5_00580W	ORF19.931		The Gene column refers to the gene name of the mutated gene in the strain.
31	C2_01450C	ORF19.1449
39	C3_01410C	ORF19.1710
57	C3_00960W	ORF19.2500
58	CR_01740W	ORF19.2570	MCI4
62	CR_02620C	ORF19.2821
73	C4_03510C	ORF19.3380	HWP2
93	C1_09020W	ORF19.4758
103	C1_13070C	ORF19.4933	FAD3
111	C1_12290C	ORF19.5234	RBD1
120	C6_02740W	ORF19.5547
129	C1_00700W	ORF19.6035
147	C3_06470W	ORF19.7436	AAF1
193	C2_06540C	ORF19.30
225	C3_02960C	ORF19.290	KRE5
226	C3_03030C	ORF19.299	ECM14
229	C3_03290C	ORF19.328	NPR2
245	CR_03900W	ORF19.469	HST7
253	C2_09370C	ORF19.564	KAR3
263	CR_05030W	ORF19.649
265	C1_11400C	ORF19.663	GIN4
271	CR_06590C	ORF19.695	RGS2
274	CR_06670W	ORF19.701	CFL11
275	CR_06440C	ORF19.723	BCR1
276	CR_06420W	ORF19.726	PPZ1
277	CR_07580C	ORF19.728	TSC11
287	C1_04630C	ORF19.783
288	C2_04260W	ORF19.794
293	C2_04140W	ORF19.807	CHS5
294	C2_04050C	ORF19.815	DCK1
299	C2_03770C	ORF19.844	STE11
307	C2_03330C	ORF19.895	HOG1
324	C6_04340W	ORF19.1092
333	C6_00280W	ORF19.1187	CPH2
360	C2_09770C	ORF19.1373	INP51
370	C2_01620W	ORF19.1471	COX4
372	C2_01780W	ORF19.1490	MSB2
379	C2_02440W	ORF19.1567
388	C3_02240C	ORF19.1621	GPA2
395	C3_01810C	ORF19.1665	MNT1
397	C3_01730C	ORF19.1671	UTR2
401	C3_01470W	ORF19.1702	ARF3
404	C2_10310C	ORF19.1747	KIP2
415	CR_07090W	ORF19.1814	STT4
473	C2_06910W	ORF19.2245	YPT72
493	CR_03430W	ORF19.2378
504	C1_05670W	ORF19.2484
508	CR_01520W	ORF19.2538	PTC2
520	C4_02970C	ORF19.2695	UBR1
521	C4_02960W	ORF19.2697
528	C4_02500C	ORF19.2752	ADR1
540	CR_02850C	ORF19.2842	GZF3
544	C4_06480C	ORF19.2886	CEK1
593	C1_01270W	ORF19.3315	CTA9
643	CR_07810W	ORF19.3710	YHB5
655	C4_04850C	ORF19.3794	CSR1
658	C4_04710W	ORF19.3811	GYP1
660	C4_04530C	ORF19.3829	PHR1
664	C4_04420W	ORF19.3845	FGR3
665	CR_06040W	ORF19.3854
674	C5_04600C	ORF19.3944	GRR1
678	C5_05030C	ORF19.3995	RIM13
683	C5_05210W	ORF19.4014
687	C5_05400W	ORF19.4036	APM1
690	C1_05140W	ORF19.4056	GAT2
692	C2_09230C	ORF19.4084	KIS1
706	C4_00610W	ORF19.4182
724	C5_02670W	ORF19.4284	BUR2
728	C5_02840C	ORF19.4308	HSL1
733	CR_03800C	ORF19.4378	PPH3 (partial?)
746	C1_07230W	ORF19.4444	PHO15
748	C1_03870C	ORF19.4459
750	C1_03960C	ORF19.4471
770	C4_01890C	ORF19.4603	ARL1
776	C4_01380W	ORF19.4649
786	C1_08700W	ORF19.4729
791	C1_08990C	ORF19.4755	KEX2
795	C1_09140C	ORF19.4772	SSU81
796	C1_09260C	ORF19.4785	PTC1
805	C1_09790C	ORF19.4844
808	C1_09920W	ORF19.4859
809	C1_10000C	ORF19.4866	CPP1
812	C1_10210C	ORF19.4890	CLA4
822	C1_13440C	ORF19.4972	OFI1
831	C1_07970C	ORF19.5068	IRE1
851	C1_04380W	ORF19.5200	SIT4
855	C1_12230W	ORF19.5241	SNT1
863	C4_04090C	ORF19.5300
875	C3_00570C	ORF19.5406
881	C3_00240C	ORF19.5445	GLO3
882	C2_06170C	ORF19.5477
903	C4_00340W	ORF19.5661	PTC7
918	C2_03180C	ORF19.5776	TOM1
941	C3_05170W	ORF19.5992	WOR2
944	C1_00930C	ORF19.6011	SIN3
957	C3_07860C	ORF19.6182	MRR2
969	CR_07590W	ORF19.6293
973	C6_00130C	ORF19.6324	VID27
976	C1_12650C	ORF19.6358
992	C7_01950W	ORF19.6526
1005	CR_05620C	ORF19.6653
1018	C3_07550C	ORF19.6736
1031	C1_04480C	ORF19.6842
1032	C2_05640W	ORF19.6874
1035	C3_03880C	ORF19.6927	PEP8
1039	C3_05420W	ORF19.6980
1054	C7_00340C	ORF19.7086
1071	C1_14140C	ORF19.7221	SET3
1072	C1_14170W	ORF19.7224
1074	C1_14340C	ORF19.7247	RIM101
1076	CR_08870W	ORF19.7282	PEX13
1095	C3_06000W	ORF19.7381	AHR1
1098	C3_06070C	ORF19.7388	PBS2
1108	CR_00590W	ORF19.7475	PHO81
1119	CR_10340W	ORF19.7610	PTP3
1128	C2_02200W	ORF19.9111
1133	CR_02640W	ORF19.10341	RFG1
1139	C4_05030C	ORF19.11257	SSK2
1147	C1_07870C	ORF19.12525	SMI1
1149	C6_03920W	ORF19.13191	SNF4
